# Supplementary material
Source: publisher site journal article supplement (https://www.dovepress.com/get_supplementary_file.php?f=335293.xlsx)
Supplement: Supplementary file 1 [file get_supplementary_file.php]

## Sheet: Table S1
Table S1. The clinical information of participants.
No.	Uyghur/ Han	Sample type	Age	Gender	Active/ Healthy	Group 1/2
1	Uyghur	UIU 8	46	Female	Active	1
2	Uyghur	UIU 9	24	Male	Active	1
3	Uyghur	UIU 10	32	Female	Active	2
4	Uyghur	UIU 11	61	Male	Active	2
5	Uyghur	UIN 1	58	Male	Healthy	2
6	Uyghur	UIN 2	25	Male	Healthy	1
7	Uyghur	UIN 3	45	Female	Healthy	2
8	Uyghur	UIN 4	37	Female	Healthy	1
9	Han	HU 4	54	Female	Active	1
10	Han	HU 11	32	Female	Active	2
11	Han	HU 12	68	Male	Active	1
12	Han	HU 16	26	Male	Active	2
13	Han	HN 1	29	Female	Healthy	1
14	Han	HN 2	58	Female	Healthy	2
15	Han	HN 3	64	Male	Healthy	2
16	Han	HN 4	33	Male	Healthy	1
17	Han	HN 7	47	Female	Healthy	1
18	Han	HN 8	36	Male	Healthy	1
19	Han	HN 5	58	Male	Healthy	2
20	Han	HN 6	60	Female	Healthy	2
21	Han	HU 1	28	Female	Active	2
22	Han	HU 3	25	Male	Active	2
23	Han	HU 10	56	Male	Active	1
24	Han	HU 2	31	Female	Active	1
25	Uyghur	UIU 12	53	Female	Healthy	1
26	Uyghur	UIU 13	41	Female	Healthy	2
27	Uyghur	UIU 14	37	Male	Healthy	1
28	Uyghur	UIU 15	29	Male	Healthy	2
29	Uyghur	UIN 5	34	Male	Active	1
30	Uyghur	UIN 6	62	Male	Active	2
31	Uyghur	UIN 7	48	Female	Active	1
32	Uyghur	UIN 8	25	Female	Active	2
UIU: Uighur patients with ulcerative colitis; UIN: Uighur healthy participants; HU: Han patients with ulcerative colitis; HN: Han healthy participants. Group 1: samples used for bioinformatic prediction; Group 2: samples used for experimental validation.

## Sheet: Table S2
Table S2. 125 mRNAs
CHI3L1
ACSL4
MTMR11
CTSK
CHRDL2
CLDN8
PDPN
SAA1
ACAT1
C1R
CES2
HMGA2
SSTR1
PDZD3
TRABD2A
TMEM72
ITPKA
CHP2
OAF
CAPN13
RGS5
LPCAT1
IGFBP7
CDH3
C2
EPB41L4B
NEURL1B
VIPR1
CLDN1
IFITM2
CXCL8
BCAT2
ZNF611
C2CD4A
IGFBP5
SLC9A2
IRAK3
PADI2
ELK3
OTOP2
SERPINI1
SRD5A3
MMP12
PLCD1
IKBIP
PPARGC1A
NOS2
SAA1
PLAU
C4BPA
ELOVL5
RNF183
EGFL6
TGFBI
SLC22A5
AMACR
CA7
FGFR3
TRPM6
PCDH17
SLC6A14
LAMA1
NFE2L3
SOCS1
SELENBP1
ANGPTL2
SOX18
SULF1
SLC4A4
LIPG
SPNS2
PCLO
STOM
DHRS11
SERPINE1
FCN1
S100A8
TNC
TGM2
C4BPB
TXNDC15
SLC25A34
SDR16C5
BEST4
TMEM158
LYZ
F3
EDN1
CFI
TTC9
RUNDC3B
TEX11
ARNTL2
ACKR3
ACSF2
ABCC9
MMP10
S100A11
GUCA2A
UGT1A1
PIGZ
ARFGAP3
ANXA1
AQP9
TMIGD1
ADIRF
GPR126
LILRB2
MMP9
AQP8
IGLL3P
L1TD1
MMP3
TREM1
TRIL
HMGCS2
APIP
CA1
MFSD4
C3
ME1
KDELR3
PDZK1
CTSA
OLFM4

## Sheet: Table S3
Table S3. GO terms and KEGG pathways
ID	Description	GeneRatio	BgRatio	pvalue	p.adjust	qvalue	geneID	Count
GO:0042119	neutrophil activation	15/115	498/17653	8.31512e-07	0.00132567	0.00112012	1116/79888/3576/11240/5328/2040/2219/6279/4069/6282/10288/4318/718/5476/10562	15
GO:0002526	acute inflammatory response	10/115	215/17653	1.42647e-06	0.00132567	0.00112012	6288/715/717/722/6279/725/2152/3426/54658/718	10
GO:0043062	extracellular structure organization	13/115	395/17653	1.79603e-06	0.00132567	0.00112012	1513/10630/4321/25975/7045/284217/23213/9388/5054/3371/4319/4318/4314	13
GO:0030198	extracellular matrix organization	12/115	341/17653	2.30953e-06	0.00132567	0.00112012	1513/10630/4321/25975/7045/284217/23213/5054/3371/4319/4318/4314	12
GO:0043312	neutrophil degranulation	14/115	485/17653	3.26152e-06	0.00134024	0.00113243	1116/79888/11240/5328/2040/2219/6279/4069/6282/10288/4318/718/5476/10562	14
GO:0002283	neutrophil activation involved in immune response	14/115	488/17653	3.50236e-06	0.00134024	0.00113243	1116/79888/11240/5328/2040/2219/6279/4069/6282/10288/4318/718/5476/10562	14
GO:0002446	neutrophil mediated immunity	14/115	500/17653	4.6322e-06	0.00151936	0.00128378	1116/79888/11240/5328/2040/2219/6279/4069/6282/10288/4318/718/5476/10562	14
GO:0006959	humoral immune response	11/115	329/17653	1.01097e-05	0.00290148	0.0024516	715/717/722/124976/2219/6279/725/4069/3426/54210/718	11
GO:0050727	regulation of inflammatory response	12/115	411/17653	1.53464e-05	0.00391503	0.00330799	6288/715/717/4843/722/5054/6279/7052/725/3426/301/718	12
GO:0002920	regulation of humoral immune response	7/115	125/17653	1.75371e-05	0.00402652	0.0034022	715/717/722/124976/725/3426/718	7
GO:0042044	fluid transport	4/115	26/17653	2.2872e-05	0.00467022	0.00394609	79849/1906/366/343	4
GO:0072376	protein activation cascade	8/115	182/17653	2.53061e-05	0.00467022	0.00394609	715/717/722/2219/725/2152/3426/718	8
GO:0061448	connective tissue development	9/115	240/17653	2.74895e-05	0.00467022	0.00394609	1116/25884/38/8091/10891/7045/2261/23213/1906	9
GO:1901570	fatty acid derivative biosynthetic process	6/115	91/17653	2.84769e-05	0.00467022	0.00394609	2182/38/60481/1906/301/3158	6
GO:0072606	interleukin-8 secretion	4/115	28/17653	3.10114e-05	0.00474681	0.00401081	1116/4843/2219/301	4
GO:0022617	extracellular matrix disassembly	6/115	94/17653	3.42386e-05	0.00491323	0.00415143	1513/10630/4321/4319/4318/4314	6
GO:0032496	response to lipopolysaccharide	10/115	327/17653	5.5381e-05	0.0074797	0.00631995	9076/3576/11213/10891/4843/5054/6279/1906/54658/10288	10
GO:0030449	regulation of complement activation	6/115	107/17653	7.09601e-05	0.00852679	0.0072047	715/717/722/725/3426/718	6
GO:0031282	regulation of guanylate cyclase activity	3/115	13/17653	7.34468e-05	0.00852679	0.0072047	79849/4843/2980	3
GO:2000257	regulation of protein activation cascade	6/115	108/17653	7.47392e-05	0.00852679	0.0072047	715/717/722/725/3426/718	6
GO:0030574	collagen catabolic process	5/115	68/17653	8.07965e-05	0.00852679	0.0072047	1513/4321/4319/4318/4314	5
GO:0006956	complement activation	7/115	159/17653	8.17767e-05	0.00852679	0.0072047	715/717/722/2219/725/3426/718	7
GO:0002237	response to molecule of bacterial origin	10/115	345/17653	8.64689e-05	0.00852679	0.0072047	9076/3576/11213/10891/4843/5054/6279/1906/54658/10288	10
GO:1901568	fatty acid derivative metabolic process	7/115	162/17653	9.19595e-05	0.00852679	0.0072047	2182/38/8824/60481/1906/301/3158	7
GO:0032637	interleukin-8 production	5/115	70/17653	9.2844e-05	0.00852679	0.0072047	1116/4843/5054/2219/301	5
GO:0070613	regulation of protein processing	7/115	167/17653	0.000111213	0.009821	0.00829823	715/717/722/5054/725/3426/718	7
GO:1903317	regulation of protein maturation	7/115	169/17653	0.000119779	0.0101857	0.00860635	715/717/722/5054/725/3426/718	7
GO:0019216	regulation of lipid metabolic process	10/115	366/17653	0.000140392	0.0115121	0.00972714	79888/3490/10891/60481/2261/54658/301/3158/718/4199	10
GO:0030193	regulation of blood coagulation	5/115	78/17653	0.000155386	0.0118665	0.0100265	10630/5328/5054/2152/1906	5
GO:1900046	regulation of hemostasis	5/115	78/17653	0.000155386	0.0118665	0.0100265	10630/5328/5054/2152/1906	5
GO:0006631	fatty acid metabolic process	10/115	372/17653	0.000160218	0.0118665	0.0100265	2182/38/8824/10891/60481/23600/1906/80221/301/718	10
GO:0043277	apoptotic cell clearance	4/115	43/17653	0.000173364	0.0124389	0.0105102	717/2219/7052/718	4
GO:0006958	complement activation, classical pathway	6/115	128/17653	0.000190653	0.0132648	0.0112081	715/717/722/725/3426/718	6
GO:0051216	cartilage development	7/115	184/17653	0.000202623	0.013683	0.0115614	1116/25884/8091/7045/2261/23213/1906	7
GO:0006694	steroid biosynthetic process	7/115	186/17653	0.000216508	0.01405	0.0118715	38/3490/79644/10891/23600/79154/3158	7
GO:0050818	regulation of coagulation	5/115	84/17653	0.000220296	0.01405	0.0118715	10630/5328/5054/2152/1906	5
GO:0006833	water transport	3/115	19/17653	0.000241848	0.0147718	0.0124814	79849/366/343	3
GO:0061041	regulation of wound healing	6/115	134/17653	0.000244482	0.0147718	0.0124814	10630/5328/5054/2152/1906/301	6
GO:0045766	positive regulation of angiogenesis	7/115	193/17653	0.000271277	0.0159705	0.0134943	1116/8091/3576/5054/2152/301/718	7
GO:0002455	humoral immune response mediated by circulating immunoglobulin	6/115	139/17653	0.000297908	0.0165528	0.0139863	715/717/722/725/3426/718	6
GO:0050663	cytokine secretion	7/115	196/17653	0.000297925	0.0165528	0.0139863	1116/6288/4321/4843/8651/2219/301	7
GO:0016485	protein processing	9/115	329/17653	0.000302796	0.0165528	0.0139863	715/717/5328/722/5054/725/2152/3426/718	9
GO:0002697	regulation of immune effector process	10/115	405/17653	0.000316601	0.016905	0.0142838	715/717/11213/4321/722/725/3426/301/9865/718	10
GO:0014812	muscle cell migration	5/115	93/17653	0.000354024	0.0182421	0.0154136	3488/10891/5328/5054/301	5
GO:0030595	leukocyte chemotaxis	7/115	202/17653	0.000357532	0.0182421	0.0154136	6288/3576/11240/5054/6279/1906/301	7
GO:0030826	regulation of cGMP biosynthetic process	3/115	22/17653	0.000378925	0.0189133	0.0159808	79849/4843/2980	3
GO:0071398	cellular response to fatty acid	4/115	53/17653	0.000391267	0.0191138	0.0161502	9076/10891/3371/1906	4
GO:0090303	positive regulation of wound healing	4/115	54/17653	0.00042046	0.020112	0.0169936	10630/5054/2152/301	4
GO:0002673	regulation of acute inflammatory response	6/115	149/17653	0.000432027	0.0202436	0.0171047	715/717/722/725/3426/718	6
GO:1904018	positive regulation of vasculature development	7/115	215/17653	0.000519608	0.0238604	0.0201608	1116/8091/3576/5054/2152/301/718	7
GO:0006637	acyl-CoA metabolic process	5/115	103/17653	0.000566364	0.0250072	0.0211297	2182/38/60481/80221/3158	5
GO:0035383	thioester metabolic process	5/115	103/17653	0.000566364	0.0250072	0.0211297	2182/38/60481/80221/3158	5
GO:0071621	granulocyte chemotaxis	5/115	105/17653	0.000618314	0.0262044	0.0221414	6288/3576/6279/1906/301	5
GO:0030194	positive regulation of blood coagulation	3/115	26/17653	0.00062772	0.0262044	0.0221414	10630/5054/2152	3
GO:1900048	positive regulation of hemostasis	3/115	26/17653	0.00062772	0.0262044	0.0221414	10630/5054/2152	3
GO:1903034	regulation of response to wounding	6/115	161/17653	0.000650605	0.0266748	0.0225388	10630/5328/5054/2152/1906/301	6
GO:0050820	positive regulation of coagulation	3/115	27/17653	0.000702845	0.0283111	0.0239214	10630/5054/2152	3
GO:0030823	regulation of cGMP metabolic process	3/115	28/17653	0.000783465	0.0306615	0.0259074	79849/4843/2980	3
GO:0046890	regulation of lipid biosynthetic process	6/115	167/17653	0.000787906	0.0306615	0.0259074	79888/3490/10891/60481/301/718	6
GO:1903036	positive regulation of response to wounding	4/115	64/17653	0.000803566	0.0307498	0.025982	10630/5054/2152/301	4
GO:0015711	organic anion transport	10/115	460/17653	0.000851195	0.0320384	0.0270708	2182/4843/6584/766/11254/8671/1906/301/366/759	10
GO:0034754	cellular hormone metabolic process	5/115	115/17653	0.00093346	0.0345681	0.0292083	79644/10891/79154/195814/54658	5
GO:0008202	steroid metabolic process	8/115	311/17653	0.000982161	0.0354499	0.0299533	38/3490/79644/10891/23600/79154/54658/3158	8
GO:0050900	leukocyte migration	10/115	470/17653	0.00100193	0.0354499	0.0299533	6288/3576/11240/124976/5054/6279/1906/301/4318/54210	10
GO:0051604	protein maturation	9/115	390/17653	0.00102476	0.0354499	0.0299533	715/717/5328/722/5054/725/2152/3426/718	9
GO:0014912	negative regulation of smooth muscle cell migration	3/115	31/17653	0.00105983	0.0354499	0.0299533	3488/10891/5054	3
GO:0046949	fatty-acyl-CoA biosynthetic process	3/115	31/17653	0.00105983	0.0354499	0.0299533	2182/38/60481	3
GO:0045785	positive regulation of cell adhesion	9/115	392/17653	0.00106204	0.0354499	0.0299533	10630/6288/54566/25975/8651/7052/301/10288/10562	9
GO:0097529	myeloid leukocyte migration	6/115	177/17653	0.00106535	0.0354499	0.0299533	6288/3576/5054/6279/1906/301	6
GO:0097530	granulocyte migration	5/115	119/17653	0.0010882	0.0356931	0.0301588	6288/3576/6279/1906/301	5
GO:0071241	cellular response to inorganic substance	6/115	180/17653	0.00116168	0.0371168	0.0313618	63928/9076/10891/1906/4318/4314	6
GO:0045923	positive regulation of fatty acid metabolic process	3/115	32/17653	0.00116394	0.0371168	0.0313618	10891/60481/301	3
GO:0030335	positive regulation of cell migration	10/115	486/17653	0.00128827	0.0405187	0.0342362	10630/54566/3576/5328/5054/2152/1906/57007/301/4318	10
GO:0032963	collagen metabolic process	5/115	124/17653	0.00130747	0.0405669	0.0342769	1513/4321/4319/4318/4314	5
GO:0014910	regulation of smooth muscle cell migration	4/115	74/17653	0.0013844	0.0418236	0.0353387	3488/10891/5328/5054	4
GO:0050764	regulation of phagocytosis	4/115	74/17653	0.0013844	0.0418236	0.0353387	717/722/725/718	4
GO:0001501	skeletal system development	10/115	493/17653	0.00143299	0.0427292	0.036104	1116/25884/8091/7045/2261/23213/124976/1906/23508/4318	10
GO:0010165	response to X-ray	3/115	35/17653	0.00151425	0.044009	0.0371853	8091/121457/301	3
GO:0071392	cellular response to estradiol stimulus	3/115	35/17653	0.00151425	0.044009	0.0371853	6751/10891/54658	3
GO:0006692	prostanoid metabolic process	3/115	36/17653	0.00164411	0.0466035	0.0393775	8824/1906/301	3
GO:0006693	prostaglandin metabolic process	3/115	36/17653	0.00164411	0.0466035	0.0393775	8824/1906/301	3
GO:0035690	cellular response to drug	8/115	340/17653	0.00172938	0.0484227	0.0409147	8091/10891/4843/1906/54658/301/10974/4314	8
GO:0002713	negative regulation of B cell mediated immunity	2/115	10/17653	0.00182965	0.0485541	0.0410257	722/725	2
GO:0002890	negative regulation of immunoglobulin mediated immune response	2/115	10/17653	0.00182965	0.0485541	0.0410257	722/725	2
GO:0002923	regulation of humoral immune response mediated by circulating immunoglobulin	2/115	10/17653	0.00182965	0.0485541	0.0410257	722/725	2
GO:0051547	regulation of keratinocyte migration	2/115	10/17653	0.00182965	0.0485541	0.0410257	54566/4318	2
GO:0016064	immunoglobulin mediated immune response	6/115	197/17653	0.00183981	0.0485541	0.0410257	715/717/722/725/3426/718	6
GO:0019724	B cell mediated immunity	6/115	198/17653	0.00188741	0.0492441	0.0416087	715/717/722/725/3426/718	6
GO:0070542	response to fatty acid	4/115	81/17653	0.00193319	0.0498719	0.0421392	9076/10891/3371/1906	4
GO:0014909	smooth muscle cell migration	4/115	82/17653	0.00202224	0.0506438	0.0427914	3488/10891/5328/5054	4
GO:0070098	chemokine-mediated signaling pathway	4/115	82/17653	0.00202224	0.0506438	0.0427914	3576/11240/1906/57007	4
GO:1903900	regulation of viral life cycle	5/115	137/17653	0.00202928	0.0506438	0.0427914	8091/10581/3576/2040/2219	5
GO:0060326	cell chemotaxis	7/115	273/17653	0.00207586	0.0512492	0.0433029	6288/3576/11240/5054/6279/1906/301	7
GO:0002921	negative regulation of humoral immune response	2/115	11/17653	0.00222673	0.0523033	0.0441936	722/725	2
GO:0031284	positive regulation of guanylate cyclase activity	2/115	11/17653	0.00222673	0.0523033	0.0441936	4843/2980	2
GO:0045091	regulation of single stranded viral RNA replication via double stranded DNA intermediate	2/115	11/17653	0.00222673	0.0523033	0.0441936	8091/3576	2
GO:0046950	cellular ketone body metabolic process	2/115	11/17653	0.00222673	0.0523033	0.0441936	38/3158	2
GO:0035337	fatty-acyl-CoA metabolic process	3/115	40/17653	0.00223246	0.0523033	0.0441936	2182/38/60481	3
GO:0050777	negative regulation of immune response	5/115	141/17653	0.00230062	0.0533559	0.0450829	11213/4321/722/725/301	5
GO:0006182	cGMP biosynthetic process	3/115	41/17653	0.00239736	0.0534811	0.0451887	79849/4843/2980	3
GO:0010955	negative regulation of protein processing	3/115	41/17653	0.00239736	0.0534811	0.0451887	722/5054/725	3
GO:1903318	negative regulation of protein maturation	3/115	41/17653	0.00239736	0.0534811	0.0451887	722/5054/725	3
GO:0048661	positive regulation of smooth muscle cell proliferation	4/115	86/17653	0.00240686	0.0534811	0.0451887	10891/7052/1906/4318	4
GO:0048660	regulation of smooth muscle cell proliferation	5/115	143/17653	0.00244578	0.0534811	0.0451887	3488/10891/7052/1906/4318	5
GO:0051384	response to glucocorticoid	5/115	143/17653	0.00244578	0.0534811	0.0451887	3490/9076/1906/54658/301	5
GO:0032309	icosanoid secretion	3/115	42/17653	0.00256962	0.0543695	0.0459394	4843/1906/301	3
GO:0030593	neutrophil chemotaxis	4/115	88/17653	0.00261684	0.0543695	0.0459394	6288/3576/6279/1906	4
GO:0045069	regulation of viral genome replication	4/115	88/17653	0.00261684	0.0543695	0.0459394	8091/10581/3576/2040	4
GO:0008228	opsonization	2/115	12/17653	0.00266073	0.0543695	0.0459394	722/725	2
GO:0039692	single stranded viral RNA replication via double stranded DNA intermediate	2/115	12/17653	0.00266073	0.0543695	0.0459394	8091/3576	2
GO:0045591	positive regulation of regulatory T cell differentiation	2/115	12/17653	0.00266073	0.0543695	0.0459394	8651/10288	2
GO:1902224	ketone body metabolic process	2/115	12/17653	0.00266073	0.0543695	0.0459394	38/3158	2
GO:0048659	smooth muscle cell proliferation	5/115	146/17653	0.00267585	0.0543695	0.0459394	3488/10891/7052/1906/4318	5
GO:0015908	fatty acid transport	4/115	89/17653	0.0027264	0.0544179	0.0459803	2182/4843/1906/301	4
GO:0045765	regulation of angiogenesis	8/115	366/17653	0.00272968	0.0544179	0.0459803	1116/8091/3576/23213/5054/2152/301/718	8
GO:0006636	unsaturated fatty acid biosynthetic process	3/115	43/17653	0.00274934	0.0544179	0.0459803	60481/1906/301	3
GO:0032103	positive regulation of response to external stimulus	7/115	289/17653	0.00285379	0.0560025	0.0473192	3576/5054/6279/7052/2152/1906/718	7
GO:0015701	bicarbonate transport	3/115	44/17653	0.00293662	0.0571397	0.0482801	766/8671/759	3
GO:0015697	quaternary ammonium group transport	2/115	13/17653	0.00313114	0.0575209	0.0486021	6584/5174	2
GO:0017014	protein nitrosylation	2/115	13/17653	0.00313114	0.0575209	0.0486021	4843/6279	2
GO:0018119	peptidyl-cysteine S-nitrosylation	2/115	13/17653	0.00313114	0.0575209	0.0486021	4843/6279	2
GO:0032310	prostaglandin secretion	2/115	13/17653	0.00313114	0.0575209	0.0486021	4843/1906	2
GO:0043568	positive regulation of insulin-like growth factor receptor signaling pathway	2/115	13/17653	0.00313114	0.0575209	0.0486021	1001/3488	2
GO:0071715	icosanoid transport	3/115	45/17653	0.00313158	0.0575209	0.0486021	4843/1906/301	3
GO:1901571	fatty acid derivative transport	3/115	45/17653	0.00313158	0.0575209	0.0486021	4843/1906/301	3
GO:0010876	lipid localization	8/115	377/17653	0.00326932	0.0595742	0.0503371	2182/4843/9388/124976/1906/301/366/718	8
GO:0002712	regulation of B cell mediated immunity	3/115	46/17653	0.00333431	0.0598092	0.0505356	722/725/718	3
GO:0002889	regulation of immunoglobulin mediated immune response	3/115	46/17653	0.00333431	0.0598092	0.0505356	722/725/718	3
GO:0031349	positive regulation of defense response	9/115	466/17653	0.00343142	0.0610739	0.0516043	1513/11213/4321/5054/2219/6279/7052/9865/718	9
GO:0071248	cellular response to metal ion	5/115	156/17653	0.00355655	0.0628142	0.0530747	63928/9076/10891/1906/4318	5
GO:0002062	chondrocyte differentiation	4/115	97/17653	0.00371828	0.0651693	0.0550646	8091/7045/2261/23213	4
GO:0015718	monocarboxylic acid transport	5/115	158/17653	0.00375497	0.0653138	0.0551867	2182/4843/1906/301/366	5
GO:0031960	response to corticosteroid	5/115	160/17653	0.00396122	0.068027	0.0574793	3490/9076/1906/54658/301	5
GO:0030850	prostate gland development	3/115	49/17653	0.00399006	0.068027	0.0574793	23213/3371/301	3
GO:1990266	neutrophil migration	4/115	99/17653	0.00399985	0.068027	0.0574793	6288/3576/6279/1906	4
GO:0001946	lymphangiogenesis	2/115	15/17653	0.0041793	0.0690337	0.0583298	10630/54345	2
GO:0009812	flavonoid metabolic process	2/115	15/17653	0.0041793	0.0690337	0.0583298	10891/54658	2
GO:0045723	positive regulation of fatty acid biosynthetic process	2/115	15/17653	0.0041793	0.0690337	0.0583298	60481/301	2
GO:0051546	keratinocyte migration	2/115	15/17653	0.0041793	0.0690337	0.0583298	54566/4318	2
GO:1901342	regulation of vasculature development	8/115	396/17653	0.00439349	0.0697401	0.0589267	1116/8091/3576/23213/5054/2152/301/718	8
GO:0006885	regulation of pH	4/115	102/17653	0.00444873	0.0697401	0.0589267	6549/766/8671/1906	4
GO:0030195	negative regulation of blood coagulation	3/115	51/17653	0.00446778	0.0697401	0.0589267	5328/5054/1906	3
GO:0031638	zymogen activation	3/115	51/17653	0.00446778	0.0697401	0.0589267	715/5328/5054	3
GO:0035384	thioester biosynthetic process	3/115	51/17653	0.00446778	0.0697401	0.0589267	2182/38/60481	3
GO:0071320	cellular response to cAMP	3/115	51/17653	0.00446778	0.0697401	0.0589267	3488/366/343	3
GO:0071616	acyl-CoA biosynthetic process	3/115	51/17653	0.00446778	0.0697401	0.0589267	2182/38/60481	3
GO:1900047	negative regulation of hemostasis	3/115	51/17653	0.00446778	0.0697401	0.0589267	5328/5054/1906	3
GO:0002460	adaptive immune response based on somatic recombination of immune receptors built from immunoglobulin superfamily domains	7/115	314/17653	0.00449544	0.0697401	0.0589267	715/717/722/725/3426/301/718	7
GO:0033559	unsaturated fatty acid metabolic process	4/115	103/17653	0.00460559	0.0708482	0.059863	8824/60481/1906/301	4
GO:0062013	positive regulation of small molecule metabolic process	5/115	166/17653	0.00462858	0.0708482	0.059863	10891/4843/60481/2980/301	5
GO:0002643	regulation of tolerance induction	2/115	16/17653	0.00475609	0.070909	0.0599144	11213/10288	2
GO:0015732	prostaglandin transport	2/115	16/17653	0.00475609	0.070909	0.0599144	4843/1906	2
GO:0035988	chondrocyte proliferation	2/115	16/17653	0.00475609	0.070909	0.0599144	8091/2261	2
GO:0048535	lymph node development	2/115	16/17653	0.00475609	0.070909	0.0599144	10630/124976	2
GO:1901617	organic hydroxy compound biosynthetic process	6/115	240/17653	0.00487255	0.0721765	0.0609854	38/3706/1001/79644/23600/3158	6
GO:0002698	negative regulation of immune effector process	4/115	105/17653	0.00493041	0.0723491	0.0611312	11213/722/725/301	4
GO:0001960	negative regulation of cytokine-mediated signaling pathway	3/115	53/17653	0.00497873	0.0723491	0.0611312	11213/11240/4321	3
GO:0046068	cGMP metabolic process	3/115	53/17653	0.00497873	0.0723491	0.0611312	79849/4843/2980	3
GO:0001959	regulation of cytokine-mediated signaling pathway	5/115	172/17653	0.00537241	0.0770941	0.0651405	11213/11240/4321/8651/1906	5
GO:0050707	regulation of cytokine secretion	5/115	172/17653	0.00537241	0.0770941	0.0651405	6288/4321/8651/2219/301	5
GO:0001819	positive regulation of cytokine production	8/115	411/17653	0.0054749	0.0780768	0.0659708	6288/4321/23213/5054/2219/301/10288/718	8
GO:0071222	cellular response to lipopolysaccharide	5/115	174/17653	0.00563812	0.0799082	0.0675182	3576/10891/4843/5054/10288	5
GO:0031279	regulation of cyclase activity	3/115	56/17653	0.00580882	0.0812073	0.068616	79849/4843/2980	3
GO:0050819	negative regulation of coagulation	3/115	56/17653	0.00580882	0.0812073	0.068616	5328/5054/1906	3
GO:0006909	phagocytosis	7/115	330/17653	0.00586941	0.0812073	0.068616	717/722/2219/7052/725/301/718	7
GO:0002685	regulation of leukocyte migration	5/115	176/17653	0.00591299	0.0812073	0.068616	3576/11240/5054/1906/301	5
GO:0002688	regulation of leukocyte chemotaxis	4/115	111/17653	0.00599636	0.0812073	0.068616	3576/11240/5054/1906	4
GO:0035338	long-chain fatty-acyl-CoA biosynthetic process	2/115	18/17653	0.00601274	0.0812073	0.068616	2182/60481	2
GO:0036303	lymph vessel morphogenesis	2/115	18/17653	0.00601274	0.0812073	0.068616	10630/54345	2
GO:0051195	negative regulation of cofactor metabolic process	2/115	18/17653	0.00601274	0.0812073	0.068616	10891/4314	2
GO:0051339	regulation of lyase activity	3/115	57/17653	0.00610279	0.0814652	0.0688338	79849/4843/2980	3
GO:0060761	negative regulation of response to cytokine stimulus	3/115	57/17653	0.00610279	0.0814652	0.0688338	11213/11240/4321	3
GO:0010038	response to metal ion	7/115	334/17653	0.00625735	0.0830455	0.0701691	63928/9076/10891/6279/1906/366/4318	7
GO:0048871	multicellular organismal homeostasis	7/115	335/17653	0.00635726	0.0838866	0.0708798	1513/79888/1001/9076/10891/6584/4069	7
GO:0060759	regulation of response to cytokine stimulus	5/115	180/17653	0.00649085	0.08516	0.0719558	11213/11240/4321/8651/1906	5
GO:0002221	pattern recognition receptor signaling pathway	5/115	181/17653	0.0066413	0.0852427	0.0720257	1513/11213/2219/6279/9865	5
GO:0030828	positive regulation of cGMP biosynthetic process	2/115	19/17653	0.00669167	0.0852427	0.0720257	4843/2980	2
GO:0046597	negative regulation of viral entry into host cell	2/115	19/17653	0.00669167	0.0852427	0.0720257	10581/2219	2
GO:1902170	cellular response to reactive nitrogen species	2/115	19/17653	0.00669167	0.0852427	0.0720257	10891/4314	2
GO:0050918	positive chemotaxis	3/115	59/17653	0.00671705	0.0852427	0.0720257	6288/3576/2152	3
GO:0019079	viral genome replication	4/115	115/17653	0.00678623	0.0852427	0.0720257	8091/10581/3576/2040	4
GO:0046717	acid secretion	4/115	115/17653	0.00678623	0.0852427	0.0720257	4843/1906/301/366	4
GO:0071219	cellular response to molecule of bacterial origin	5/115	182/17653	0.00679417	0.0852427	0.0720257	3576/10891/4843/5054/10288	5
GO:0007596	blood coagulation	7/115	341/17653	0.00698197	0.0871229	0.0736143	10630/6288/5328/5054/725/2152/1906	7
GO:0048732	gland development	8/115	430/17653	0.00712439	0.0884194	0.0747098	38/9076/3488/23213/3371/7052/54658/301	8
GO:0006869	lipid transport	7/115	343/17653	0.00720003	0.0888778	0.0750971	2182/4843/9388/124976/1906/301/366	7
GO:0071385	cellular response to glucocorticoid stimulus	3/115	61/17653	0.00736682	0.0904504	0.0764259	1906/54658/301	3
GO:0007599	hemostasis	7/115	346/17653	0.00753655	0.0920421	0.0777708	10630/6288/5328/5054/725/2152/1906	7
GO:0022612	gland morphogenesis	4/115	119/17653	0.00764218	0.0924597	0.0781236	3488/23213/3371/7052	4
GO:0050817	coagulation	7/115	347/17653	0.00765128	0.0924597	0.0781236	10630/6288/5328/5054/725/2152/1906	7
GO:0002822	regulation of adaptive immune response based on somatic recombination of immune receptors built from immunoglobulin superfamily domains	4/115	120/17653	0.00786674	0.0945657	0.0799031	722/725/301/718	4
GO:0032677	regulation of interleukin-8 production	3/115	63/17653	0.00805258	0.0954533	0.080653	5054/2219/301	3
GO:0009083	branched-chain amino acid catabolic process	2/115	21/17653	0.00814845	0.0954533	0.080653	38/587	2
GO:0030825	positive regulation of cGMP metabolic process	2/115	21/17653	0.00814845	0.0954533	0.080653	4843/2980	2
GO:0031281	positive regulation of cyclase activity	2/115	21/17653	0.00814845	0.0954533	0.080653	4843/2980	2
GO:0051349	positive regulation of lyase activity	2/115	21/17653	0.00814845	0.0954533	0.080653	4843/2980	2
GO:0010810	regulation of cell-substrate adhesion	5/115	191/17653	0.00828272	0.0960461	0.081154	10630/5328/25975/5054/10562	5
GO:0034341	response to interferon-gamma	5/115	191/17653	0.00828272	0.0960461	0.081154	9076/10581/4843/8651/1906	5
GO:0046889	positive regulation of lipid biosynthetic process	3/115	64/17653	0.00840908	0.0970214	0.081978	10891/60481/301	3
GO:0070555	response to interleukin-1	5/115	192/17653	0.00846099	0.0971322	0.0820717	1116/3576/11213/1906/301	5
GO:0071384	cellular response to corticosteroid stimulus	3/115	65/17653	0.00877475	0.0996254	0.0841783	1906/54658/301	3
GO:0045834	positive regulation of lipid metabolic process	4/115	124/17653	0.00880834	0.0996254	0.0841783	10891/60481/2261/301	4
GO:0050729	positive regulation of inflammatory response	4/115	124/17653	0.00880834	0.0996254	0.0841783	5054/6279/7052/718	4
GO:0032355	response to estradiol	4/115	125/17653	0.00905474	0.10191	0.0861088	6751/10891/54658/301	4
GO:0050792	regulation of viral process	5/115	196/17653	0.00920073	0.103048	0.0870703	8091/10581/3576/2040/2219	5
GO:0001516	prostaglandin biosynthetic process	2/115	23/17653	0.00973413	0.106427	0.0899249	1906/301	2
GO:0008210	estrogen metabolic process	2/115	23/17653	0.00973413	0.106427	0.0899249	79154/54658	2
GO:0016338	calcium-independent cell-cell adhesion via plasma membrane cell-adhesion molecules	2/115	23/17653	0.00973413	0.106427	0.0899249	9073/9076	2
GO:0043457	regulation of cellular respiration	2/115	23/17653	0.00973413	0.106427	0.0899249	10891/4843	2
GO:0046457	prostanoid biosynthetic process	2/115	23/17653	0.00973413	0.106427	0.0899249	1906/301	2
GO:0006720	isoprenoid metabolic process	4/115	128/17653	0.0098208	0.106865	0.0902955	79644/195814/54658/3158	4
GO:0030810	positive regulation of nucleotide biosynthetic process	3/115	68/17653	0.00992717	0.107008	0.0904165	10891/4843/2980	3
GO:1900373	positive regulation of purine nucleotide biosynthetic process	3/115	68/17653	0.00992717	0.107008	0.0904165	10891/4843/2980	3
GO:0071229	cellular response to acid chemical	5/115	200/17653	0.00998401	0.107118	0.0905092	9076/10891/8651/3371/1906	5
GO:0006140	regulation of nucleotide metabolic process	5/115	201/17653	0.0101868	0.108451	0.0916354	79849/10891/4843/2980/4199	5
GO:0042440	pigment metabolic process	3/115	69/17653	0.0103299	0.108451	0.0916354	1001/10891/54658	3
GO:0050921	positive regulation of chemotaxis	4/115	130/17653	0.0103542	0.108451	0.0916354	3576/5054/2152/1906	4
GO:0050920	regulation of chemotaxis	5/115	202/17653	0.0103923	0.108451	0.0916354	3576/11240/5054/2152/1906	5
GO:0001945	lymph vessel development	2/115	24/17653	0.0105742	0.108451	0.0916354	10630/54345	2
GO:0002507	tolerance induction	2/115	24/17653	0.0105742	0.108451	0.0916354	11213/10288	2
GO:0009081	branched-chain amino acid metabolic process	2/115	24/17653	0.0105742	0.108451	0.0916354	38/587	2
GO:0032461	positive regulation of protein oligomerization	2/115	24/17653	0.0105742	0.108451	0.0916354	129293/4314	2
GO:2000482	regulation of interleukin-8 secretion	2/115	24/17653	0.0105742	0.108451	0.0916354	2219/301	2
GO:0002819	regulation of adaptive immune response	4/115	131/17653	0.0106278	0.108451	0.0916354	722/725/301/718	4
GO:0045471	response to ethanol	4/115	131/17653	0.0106278	0.108451	0.0916354	9076/6279/3371/54658	4
GO:0071216	cellular response to biotic stimulus	5/115	204/17653	0.010812	0.109842	0.092811	3576/10891/4843/5054/10288	5
GO:0031667	response to nutrient levels	8/115	465/17653	0.0111151	0.112425	0.0949928	2182/38/6751/717/10891/9388/3371/54658	8
GO:0035336	long-chain fatty-acyl-CoA metabolic process	2/115	25/17653	0.0114452	0.113936	0.0962696	2182/60481	2
GO:0043501	skeletal muscle adaptation	2/115	25/17653	0.0114452	0.113936	0.0962696	3488/10891	2
GO:0050927	positive regulation of positive chemotaxis	2/115	25/17653	0.0114452	0.113936	0.0962696	3576/2152	2
GO:0007584	response to nutrient	5/115	207/17653	0.011463	0.113936	0.0962696	2182/717/9388/3371/54658	5
GO:0061045	negative regulation of wound healing	3/115	72/17653	0.0115947	0.114014	0.0963363	5328/5054/1906	3
GO:0002224	toll-like receptor signaling pathway	4/115	135/17653	0.0117689	0.114014	0.0963363	1513/11213/6279/9865	4
GO:0030260	entry into host cell	4/115	135/17653	0.0117689	0.114014	0.0963363	9076/10581/3576/2219	4
GO:0044409	entry into host	4/115	135/17653	0.0117689	0.114014	0.0963363	9076/10581/3576/2219	4
GO:0051806	entry into cell of other organism involved in symbiotic interaction	4/115	135/17653	0.0117689	0.114014	0.0963363	9076/10581/3576/2219	4
GO:0051828	entry into other organism involved in symbiotic interaction	4/115	135/17653	0.0117689	0.114014	0.0963363	9076/10581/3576/2219	4
GO:0045582	positive regulation of T cell differentiation	3/115	73/17653	0.0120352	0.114541	0.0967811	8651/301/10288	3
GO:0006732	coenzyme metabolic process	7/115	380/17653	0.0122118	0.114541	0.0967811	2182/38/10891/60481/80221/3158/4199	7
GO:0031639	plasminogen activation	2/115	26/17653	0.0123466	0.114541	0.0967811	5328/5054	2
GO:0039694	viral RNA genome replication	2/115	26/17653	0.0123466	0.114541	0.0967811	8091/3576	2
GO:0043567	regulation of insulin-like growth factor receptor signaling pathway	2/115	26/17653	0.0123466	0.114541	0.0967811	1001/3488	2
GO:0050926	regulation of positive chemotaxis	2/115	26/17653	0.0123466	0.114541	0.0967811	3576/2152	2
GO:0060740	prostate gland epithelium morphogenesis	2/115	26/17653	0.0123466	0.114541	0.0967811	23213/3371	2
GO:0001889	liver development	4/115	137/17653	0.0123679	0.114541	0.0967811	38/9076/54658/301	4
GO:0001894	tissue homeostasis	5/115	211/17653	0.012372	0.114541	0.0967811	1513/79888/1001/6584/4069	5
GO:0033002	muscle cell proliferation	5/115	211/17653	0.012372	0.114541	0.0967811	3488/10891/7052/1906/4318	5
GO:0051701	interaction with host	5/115	211/17653	0.012372	0.114541	0.0967811	9076/10581/3576/6584/2219	5
GO:1905954	positive regulation of lipid localization	3/115	75/17653	0.0129448	0.119362	0.100855	9388/1906/718	3
GO:0010575	positive regulation of vascular endothelial growth factor production	2/115	27/17653	0.0132782	0.120245	0.101601	23213/718	2
GO:0042730	fibrinolysis	2/115	27/17653	0.0132782	0.120245	0.101601	5328/5054	2
GO:0090314	positive regulation of protein targeting to membrane	2/115	27/17653	0.0132782	0.120245	0.101601	2040/5174	2
GO:0046165	alcohol biosynthetic process	4/115	140/17653	0.0133023	0.120245	0.101601	38/3706/79644/3158	4
GO:0061008	hepaticobiliary system development	4/115	140/17653	0.0133023	0.120245	0.101601	38/9076/54658/301	4
GO:0007568	aging	6/115	298/17653	0.0133744	0.120422	0.10175	8091/9076/3488/10891/5054/1906	6
GO:0008277	regulation of G-protein coupled receptor protein signaling pathway	4/115	141/17653	0.0136236	0.122186	0.103241	8490/3576/1906/718	4
GO:0062012	regulation of small molecule metabolic process	8/115	485/17653	0.0140342	0.124309	0.105035	79849/3488/10891/4843/60481/2980/301/4199	8
GO:0044706	multi-multicellular organism process	5/115	218/17653	0.0140784	0.124309	0.105035	2182/3490/3488/1906/4318	5
GO:0043900	regulation of multi-organism process	7/115	391/17653	0.0140965	0.124309	0.105035	8091/10581/3576/4321/4843/2040/2219	7
GO:0048545	response to steroid hormone	7/115	391/17653	0.0140965	0.124309	0.105035	3490/9076/11240/10891/1906/54658/301	7
GO:0008209	androgen metabolic process	2/115	28/17653	0.0142393	0.124309	0.105035	79644/10891	2
GO:0008299	isoprenoid biosynthetic process	2/115	28/17653	0.0142393	0.124309	0.105035	79644/3158	2
GO:0060512	prostate gland morphogenesis	2/115	28/17653	0.0142393	0.124309	0.105035	23213/3371	2
GO:0042445	hormone metabolic process	5/115	219/17653	0.0143345	0.1246	0.105281	79644/10891/79154/195814/54658	5
GO:0030802	regulation of cyclic nucleotide biosynthetic process	3/115	78/17653	0.0143811	0.1246	0.105281	79849/4843/2980	3
GO:0060627	regulation of vesicle-mediated transport	8/115	490/17653	0.0148442	0.12795	0.108111	717/145741/722/27445/5054/725/301/718	8
GO:1903901	negative regulation of viral life cycle	3/115	79/17653	0.0148792	0.12795	0.108111	8091/10581/2219	3
GO:0043903	regulation of symbiosis, encompassing mutualism through parasitism	5/115	222/17653	0.0151214	0.129547	0.109461	8091/10581/3576/2040/2219	5
GO:0045589	regulation of regulatory T cell differentiation	2/115	29/17653	0.0152296	0.12999	0.109834	8651/10288	2
GO:0014074	response to purine-containing compound	4/115	147/17653	0.0156546	0.132311	0.111796	3488/10891/366/343	4
GO:0009991	response to extracellular stimulus	8/115	495/17653	0.0156879	0.132311	0.111796	2182/38/6751/717/10891/9388/3371/54658	8
GO:0015849	organic acid transport	6/115	309/17653	0.0157321	0.132311	0.111796	2182/4843/11254/1906/301/366	6
GO:0046942	carboxylic acid transport	6/115	309/17653	0.0157321	0.132311	0.111796	2182/4843/11254/1906/301/366	6
GO:1901615	organic hydroxy compound metabolic process	8/115	497/17653	0.0160349	0.134365	0.113532	38/3706/1001/79644/5333/23600/195814/3158	8
GO:0046596	regulation of viral entry into host cell	2/115	30/17653	0.0162487	0.135171	0.114212	10581/2219	2
GO:0090023	positive regulation of neutrophil chemotaxis	2/115	30/17653	0.0162487	0.135171	0.114212	3576/1906	2
GO:0050878	regulation of body fluid levels	8/115	499/17653	0.0163875	0.135833	0.114772	10630/6288/9076/5328/5054/725/2152/1906	8
GO:0000302	response to reactive oxygen species	5/115	227/17653	0.0164964	0.136244	0.115119	10891/1906/301/4318/4314	5
GO:0042446	hormone biosynthetic process	3/115	83/17653	0.0169685	0.138672	0.11717	79644/10891/79154	3
GO:0044070	regulation of anion transport	3/115	83/17653	0.0169685	0.138672	0.11717	766/1906/5174	3
GO:0030100	regulation of endocytosis	5/115	229/17653	0.017069	0.138672	0.11717	717/722/5054/725/718	5
GO:0002449	lymphocyte mediated immunity	6/115	315/17653	0.0171329	0.138672	0.11717	715/717/722/725/3426/718	6
GO:0034694	response to prostaglandin	2/115	31/17653	0.0172963	0.138672	0.11717	3371/1906	2
GO:0044319	wound healing, spreading of cells	2/115	31/17653	0.0172963	0.138672	0.11717	10630/4321	2
GO:0045066	regulatory T cell differentiation	2/115	31/17653	0.0172963	0.138672	0.11717	8651/10288	2
GO:0090505	epiboly involved in wound healing	2/115	31/17653	0.0172963	0.138672	0.11717	10630/4321	2
GO:0019058	viral life cycle	6/115	316/17653	0.0173745	0.138672	0.11717	8091/9076/10581/3576/2040/2219	6
GO:0071774	response to fibroblast growth factor	4/115	152/17653	0.0174856	0.138672	0.11717	3576/2261/23213/3371	4
GO:0045621	positive regulation of lymphocyte differentiation	3/115	84/17653	0.0175152	0.138672	0.11717	8651/301/10288	3
GO:0050829	defense response to Gram-negative bacterium	3/115	84/17653	0.0175152	0.138672	0.11717	4843/5054/4069	3
GO:0035821	modification of morphology or physiology of other organism	4/115	153/17653	0.0178671	0.140138	0.118409	8091/4843/2040/4069	4
GO:1900371	regulation of purine nucleotide biosynthetic process	4/115	153/17653	0.0178671	0.140138	0.118409	79849/10891/4843/2980	4
GO:0019217	regulation of fatty acid metabolic process	3/115	85/17653	0.0180716	0.140138	0.118409	10891/60481/301	3
GO:1903035	negative regulation of response to wounding	3/115	85/17653	0.0180716	0.140138	0.118409	5328/5054/1906	3
GO:0010634	positive regulation of epithelial cell migration	4/115	154/17653	0.0182538	0.140138	0.118409	54566/1906/301/4318	4
GO:0030808	regulation of nucleotide biosynthetic process	4/115	154/17653	0.0182538	0.140138	0.118409	79849/10891/4843/2980	4
GO:0016042	lipid catabolic process	6/115	320/17653	0.0183642	0.140138	0.118409	38/8824/79644/5333/23600/9388	6
GO:0051260	protein homooligomerization	6/115	320/17653	0.0183642	0.140138	0.118409	38/9076/2040/7052/51074/10562	6
GO:0010574	regulation of vascular endothelial growth factor production	2/115	32/17653	0.0183717	0.140138	0.118409	23213/718	2
GO:0071624	positive regulation of granulocyte chemotaxis	2/115	32/17653	0.0183717	0.140138	0.118409	3576/1906	2
GO:0090504	epiboly	2/115	32/17653	0.0183717	0.140138	0.118409	10630/4321	2
GO:0002690	positive regulation of leukocyte chemotaxis	3/115	87/17653	0.0192137	0.145114	0.122614	3576/5054/1906	3
GO:0045981	positive regulation of nucleotide metabolic process	3/115	87/17653	0.0192137	0.145114	0.122614	10891/4843/2980	3
GO:1900544	positive regulation of purine nucleotide metabolic process	3/115	87/17653	0.0192137	0.145114	0.122614	10891/4843/2980	3
GO:0006066	alcohol metabolic process	6/115	324/17653	0.019392	0.145176	0.122666	38/3706/79644/5333/195814/3158	6
GO:0051897	positive regulation of protein kinase B signaling	4/115	157/17653	0.0194451	0.145176	0.122666	1116/3488/2261/2152	4
GO:0090313	regulation of protein targeting to membrane	2/115	33/17653	0.0194748	0.145176	0.122666	2040/5174	2
GO:1902624	positive regulation of neutrophil migration	2/115	33/17653	0.0194748	0.145176	0.122666	3576/1906	2
GO:0001942	hair follicle development	3/115	88/17653	0.0197995	0.146565	0.12384	1001/3488/54345	3
GO:0046394	carboxylic acid biosynthetic process	7/115	419/17653	0.0198224	0.146565	0.12384	587/10891/60481/23600/1906/301/51074	7
GO:0055067	monovalent inorganic cation homeostasis	4/115	158/17653	0.0198527	0.146565	0.12384	6549/766/8671/1906	4
GO:0046677	response to antibiotic	6/115	326/17653	0.0199204	0.146594	0.123864	9076/6279/3371/1906/54658/301	6
GO:0016053	organic acid biosynthetic process	7/115	420/17653	0.020053	0.147098	0.12429	587/10891/60481/23600/1906/301/51074	7
GO:0032388	positive regulation of intracellular transport	5/115	240/17653	0.0204549	0.149568	0.126377	1513/63928/1001/2040/5174	5
GO:0010573	vascular endothelial growth factor production	2/115	34/17653	0.020605	0.149713	0.126499	23213/718	2
GO:0051482	positive regulation of cytosolic calcium ion concentration involved in phospholipase C-activating G-protein coupled signaling pathway	2/115	34/17653	0.020605	0.149713	0.126499	7052/1906	2
GO:0001101	response to acid chemical	6/115	329/17653	0.0207313	0.150155	0.126873	3490/9076/10891/8651/3371/1906	6
GO:0022404	molting cycle process	3/115	90/17653	0.0210005	0.150678	0.127315	1001/3488/54345	3
GO:0022405	hair cycle process	3/115	90/17653	0.0210005	0.150678	0.127315	1001/3488/54345	3
GO:0098773	skin epidermis development	3/115	90/17653	0.0210005	0.150678	0.127315	1001/3488/54345	3
GO:0009108	coenzyme biosynthetic process	5/115	242/17653	0.0211144	0.151024	0.127607	2182/38/10891/60481/4199	5
GO:0002683	negative regulation of immune system process	7/115	426/17653	0.0214765	0.151871	0.128323	11213/11240/4321/722/725/301/10288	7
GO:0051453	regulation of intracellular pH	3/115	91/17653	0.0216157	0.151871	0.128323	6549/766/8671	3
GO:0097327	response to antineoplastic agent	3/115	91/17653	0.0216157	0.151871	0.128323	9076/1906/10974	3
GO:0045088	regulation of innate immune response	7/115	427/17653	0.0217204	0.151871	0.128323	1513/11213/4321/8651/2219/6279/9865	7
GO:0051222	positive regulation of protein transport	7/115	427/17653	0.0217204	0.151871	0.128323	1513/6288/63928/4321/2040/2219/5174	7
GO:0002707	negative regulation of lymphocyte mediated immunity	2/115	35/17653	0.0217621	0.151871	0.128323	722/725	2
GO:0002823	negative regulation of adaptive immune response based on somatic recombination of immune receptors built from immunoglobulin superfamily domains	2/115	35/17653	0.0217621	0.151871	0.128323	722/725	2
GO:0090022	regulation of neutrophil chemotaxis	2/115	35/17653	0.0217621	0.151871	0.128323	3576/1906	2
GO:0006084	acetyl-CoA metabolic process	2/115	36/17653	0.0229455	0.158683	0.134079	38/3158	2
GO:0006730	one-carbon metabolic process	2/115	36/17653	0.0229455	0.158683	0.134079	766/759	2
GO:0070741	response to interleukin-6	2/115	36/17653	0.0229455	0.158683	0.134079	1116/10891	2
GO:0072676	lymphocyte migration	3/115	94/17653	0.0235201	0.162169	0.137024	6288/11240/124976	3
GO:0030324	lung development	4/115	167/17653	0.0237587	0.163323	0.138	1116/10630/3488/3371	4
GO:0030641	regulation of cellular pH	3/115	95/17653	0.0241746	0.163731	0.138344	6549/766/8671	3
GO:0043502	regulation of muscle adaptation	3/115	95/17653	0.0241746	0.163731	0.138344	3488/10891/1906	3
GO:0048525	negative regulation of viral process	3/115	95/17653	0.0241746	0.163731	0.138344	8091/10581/2219	3
GO:1990823	response to leukemia inhibitory factor	3/115	95/17653	0.0241746	0.163731	0.138344	6751/587/11240	3
GO:1990830	cellular response to leukemia inhibitory factor	3/115	95/17653	0.0241746	0.163731	0.138344	6751/587/11240	3
GO:0019932	second-messenger-mediated signaling	6/115	342/17653	0.0245049	0.16548	0.139822	79849/63928/3576/4843/27445/1906	6
GO:0048771	tissue remodeling	4/115	169/17653	0.0246856	0.166212	0.14044	1513/3488/7052/301	4
GO:0071347	cellular response to interleukin-1	4/115	170/17653	0.0251572	0.168892	0.142705	1116/3576/11213/1906	4
GO:0002820	negative regulation of adaptive immune response	2/115	38/17653	0.0253899	0.168972	0.142772	722/725	2
GO:0060612	adipose tissue development	2/115	38/17653	0.0253899	0.168972	0.142772	38/10891	2
GO:1902622	regulation of neutrophil migration	2/115	38/17653	0.0253899	0.168972	0.142772	3576/1906	2
GO:0051591	response to cAMP	3/115	97/17653	0.0255129	0.169127	0.142903	3488/366/343	3
GO:0030323	respiratory tube development	4/115	171/17653	0.0256342	0.169127	0.142903	1116/10630/3488/3371	4
GO:0071346	cellular response to interferon-gamma	4/115	171/17653	0.0256342	0.169127	0.142903	9076/4843/8651/1906	4
GO:0007162	negative regulation of cell adhesion	5/115	255/17653	0.0257411	0.169346	0.143088	7045/5054/3371/301/10288	5
GO:0015696	ammonium transport	3/115	98/17653	0.0261967	0.171851	0.145205	6584/1906/5174	3
GO:0048009	insulin-like growth factor receptor signaling pathway	2/115	39/17653	0.0266502	0.17334	0.146463	1001/3488	2
GO:0048016	inositol phosphate-mediated signaling	2/115	39/17653	0.0266502	0.17334	0.146463	63928/1906	2
GO:0061028	establishment of endothelial barrier	2/115	39/17653	0.0266502	0.17334	0.146463	9076/54345	2
GO:0019395	fatty acid oxidation	3/115	100/17653	0.0275938	0.178671	0.150968	38/10891/23600	3
GO:0071383	cellular response to steroid hormone stimulus	5/115	260/17653	0.0276807	0.178671	0.150968	11240/10891/1906/54658/301	5
GO:0045861	negative regulation of proteolysis	6/115	352/17653	0.0277033	0.178671	0.150968	5274/722/5054/725/4318/718	6
GO:0033628	regulation of cell adhesion mediated by integrin	2/115	40/17653	0.0279353	0.179085	0.151318	5328/5054	2
GO:0042304	regulation of fatty acid biosynthetic process	2/115	40/17653	0.0279353	0.179085	0.151318	60481/301	2
GO:0045089	positive regulation of innate immune response	6/115	353/17653	0.0280377	0.179085	0.151318	1513/11213/4321/2219/6279/9865	6
GO:0051648	vesicle localization	5/115	261/17653	0.0280795	0.179085	0.151318	1001/145741/27253/27445/26286	5
GO:0042594	response to starvation	4/115	177/17653	0.0286106	0.181967	0.153752	38/6751/10891/54658	4
GO:0042176	regulation of protein catabolic process	6/115	355/17653	0.0287144	0.182122	0.153884	79888/11213/4843/722/725/5476	6
GO:0034440	lipid oxidation	3/115	102/17653	0.02903	0.183112	0.15472	38/10891/23600	3
GO:0051193	regulation of cofactor metabolic process	3/115	102/17653	0.02903	0.183112	0.15472	10891/4314/4199	3
GO:0043616	keratinocyte proliferation	2/115	41/17653	0.029245	0.183963	0.155439	1001/195814	2
GO:0002791	regulation of peptide secretion	7/115	455/17653	0.0293557	0.184155	0.155601	6288/4321/4843/8651/2219/6279/301	7
GO:0052652	cyclic purine nucleotide metabolic process	3/115	103/17653	0.0297628	0.1862	0.157329	79849/4843/2980	3
GO:0015698	inorganic anion transport	4/115	180/17653	0.0301729	0.187724	0.158617	766/8671/266675/10060	4
GO:0009190	cyclic nucleotide biosynthetic process	3/115	104/17653	0.0305052	0.187724	0.158617	79849/4843/2980	3
GO:0030799	regulation of cyclic nucleotide metabolic process	3/115	104/17653	0.0305052	0.187724	0.158617	79849/4843/2980	3
GO:1901606	alpha-amino acid catabolic process	3/115	104/17653	0.0305052	0.187724	0.158617	38/587/4843	3
GO:0015695	organic cation transport	2/115	42/17653	0.0305787	0.187724	0.158617	6584/5174	2
GO:0030804	positive regulation of cyclic nucleotide biosynthetic process	2/115	42/17653	0.0305787	0.187724	0.158617	4843/2980	2
GO:0032459	regulation of protein oligomerization	2/115	42/17653	0.0305787	0.187724	0.158617	129293/4314	2
GO:0045446	endothelial cell differentiation	3/115	105/17653	0.0312574	0.191379	0.161705	10630/9076/54345	3
GO:1904951	positive regulation of establishment of protein localization	7/115	462/17653	0.0315168	0.192454	0.162613	1513/6288/63928/4321/2040/2219/5174	7
GO:0071548	response to dexamethasone	2/115	43/17653	0.0319363	0.194498	0.164341	9076/1906	2
GO:0061138	morphogenesis of a branching epithelium	4/115	185/17653	0.0328872	0.199759	0.168786	23213/3371/7052/1906	4
GO:0006790	sulfur compound metabolic process	6/115	367/17653	0.0330018	0.199926	0.168927	2182/38/60481/80221/3158/51074	6
GO:0031099	regeneration	4/115	186/17653	0.0334467	0.202088	0.170754	9076/3371/54658/301	4
GO:0019218	regulation of steroid metabolic process	3/115	108/17653	0.0335722	0.202315	0.170945	3490/10891/54658	3
GO:0009165	nucleotide biosynthetic process	6/115	369/17653	0.0337547	0.202335	0.170962	38/79849/10891/4843/2980/4199	6
GO:0007565	female pregnancy	4/115	187/17653	0.0340117	0.202335	0.170962	2182/3490/3488/4318	4
GO:0060348	bone development	4/115	187/17653	0.0340117	0.202335	0.170962	2261/23213/124976/23508	4
GO:0006644	phospholipid metabolic process	7/115	470/17653	0.0341152	0.202335	0.170962	79888/79644/5333/2261/9388/80235/3158	7
GO:0006721	terpenoid metabolic process	3/115	109/17653	0.0343632	0.202335	0.170962	195814/54658/3158	3
GO:0043200	response to amino acid	3/115	109/17653	0.0343632	0.202335	0.170962	10891/8651/1906	3
GO:0048511	rhythmic process	5/115	276/17653	0.0345037	0.202335	0.170962	10891/4843/5054/56938/301	5
GO:0001503	ossification	6/115	371/17653	0.0345188	0.202335	0.170962	1513/25884/3488/2261/3371/4318	6
GO:0044272	sulfur compound biosynthetic process	4/115	188/17653	0.0345823	0.202335	0.170962	2182/38/60481/51074	4
GO:0002704	negative regulation of leukocyte mediated immunity	2/115	45/17653	0.0347212	0.202335	0.170962	722/725	2
GO:0018198	peptidyl-cysteine modification	2/115	45/17653	0.0347212	0.202335	0.170962	4843/6279	2
GO:0032757	positive regulation of interleukin-8 production	2/115	45/17653	0.0347212	0.202335	0.170962	5054/2219	2
GO:0045824	negative regulation of innate immune response	2/115	45/17653	0.0347212	0.202335	0.170962	11213/4321	2
GO:0009410	response to xenobiotic stimulus	5/115	277/17653	0.0349618	0.203221	0.171711	8824/9076/10891/1906/54658	5
GO:0006690	icosanoid metabolic process	3/115	110/17653	0.0351638	0.203879	0.172267	8824/1906/301	3
GO:1901293	nucleoside phosphate biosynthetic process	6/115	373/17653	0.0352939	0.204118	0.172469	38/79849/10891/4843/2980/4199	6
GO:0043500	muscle adaptation	3/115	111/17653	0.035974	0.207489	0.175317	3488/10891/1906	3
GO:0001961	positive regulation of cytokine-mediated signaling pathway	2/115	46/17653	0.0361479	0.207489	0.175317	4321/1906	2
GO:0035987	endodermal cell differentiation	2/115	46/17653	0.0361479	0.207489	0.175317	8091/4318	2
GO:0097305	response to alcohol	4/115	191/17653	0.0363276	0.208	0.175749	9076/6279/3371/54658	4
GO:0042303	molting cycle	3/115	112/17653	0.0367938	0.209624	0.177121	1001/3488/54345	3
GO:0042633	hair cycle	3/115	112/17653	0.0367938	0.209624	0.177121	1001/3488/54345	3
GO:0090316	positive regulation of intracellular protein transport	4/115	192/17653	0.0369205	0.209825	0.177291	1513/63928/2040/5174	4
GO:0060541	respiratory system development	4/115	193/17653	0.037519	0.21069	0.178022	1116/10630/3488/3371	4
GO:0030809	negative regulation of nucleotide biosynthetic process	2/115	47/17653	0.0375969	0.21069	0.178022	79849/10891	2
GO:0051353	positive regulation of oxidoreductase activity	2/115	47/17653	0.0375969	0.21069	0.178022	1001/1906	2
GO:0071622	regulation of granulocyte chemotaxis	2/115	47/17653	0.0375969	0.21069	0.178022	3576/1906	2
GO:1900372	negative regulation of purine nucleotide biosynthetic process	2/115	47/17653	0.0375969	0.21069	0.178022	79849/10891	2
GO:0042177	negative regulation of protein catabolic process	3/115	113/17653	0.0376232	0.21069	0.178022	11213/4843/5476	3
GO:0002758	innate immune response-activating signal transduction	5/115	283/17653	0.0377899	0.211109	0.178376	1513/11213/2219/6279/9865	5
GO:1900542	regulation of purine nucleotide metabolic process	4/115	194/17653	0.0381231	0.212453	0.179511	79849/10891/4843/2980	4
GO:0030004	cellular monovalent inorganic cation homeostasis	3/115	114/17653	0.0384621	0.213823	0.180669	6549/766/8671	3
GO:0007623	circadian rhythm	4/115	195/17653	0.0387327	0.21429	0.181064	10891/4843/5054/56938	4
GO:0015893	drug transport	4/115	195/17653	0.0387327	0.21429	0.181064	9076/6584/1906/5174	4
GO:0006953	acute-phase response	2/115	48/17653	0.0390679	0.215108	0.181755	6288/54658	2
GO:0046456	icosanoid biosynthetic process	2/115	48/17653	0.0390679	0.215108	0.181755	1906/301	2
GO:0008654	phospholipid biosynthetic process	5/115	287/17653	0.0397513	0.217826	0.184051	79888/79644/2261/80235/3158	5
GO:0071356	cellular response to tumor necrosis factor	5/115	287/17653	0.0397513	0.217826	0.184051	1116/9076/3576/10891/1906	5
GO:0050715	positive regulation of cytokine secretion	3/115	116/17653	0.0401685	0.219588	0.18554	6288/4321/2219	3
GO:1900024	regulation of substrate adhesion-dependent cell spreading	2/115	49/17653	0.0405606	0.220869	0.186623	10630/10562	2
GO:0001763	morphogenesis of a branching structure	4/115	198/17653	0.0405952	0.220869	0.186623	23213/3371/7052/1906	4
GO:0009152	purine ribonucleotide biosynthetic process	5/115	291/17653	0.0417739	0.226744	0.191587	38/79849/10891/4843/2980	5
GO:0009063	cellular amino acid catabolic process	3/115	118/17653	0.0419128	0.226768	0.191607	38/587/4843	3
GO:0007566	embryo implantation	2/115	50/17653	0.0420746	0.226768	0.191607	3490/4318	2
GO:0060760	positive regulation of response to cytokine stimulus	2/115	50/17653	0.0420746	0.226768	0.191607	4321/1906	2
GO:0046718	viral entry into host cell	3/115	119/17653	0.0427992	0.230133	0.19445	9076/10581/2219	3
GO:0035306	positive regulation of dephosphorylation	2/115	51/17653	0.0436096	0.233854	0.197594	63928/10288	2
GO:0032635	interleukin-6 production	3/115	120/17653	0.0436949	0.233854	0.197594	11213/4843/10288	3
GO:0006164	purine nucleotide biosynthetic process	5/115	295/17653	0.043858	0.234181	0.197871	38/79849/10891/4843/2980	5
GO:0030336	negative regulation of cell migration	5/115	296/17653	0.0443886	0.235917	0.199338	3488/11240/10891/23213/5054	5
GO:0072330	monocarboxylic acid biosynthetic process	5/115	296/17653	0.0443886	0.235917	0.199338	10891/60481/23600/1906/301	5
GO:0050766	positive regulation of phagocytosis	2/115	52/17653	0.0451652	0.23949	0.202357	717/718	2
GO:0051188	cofactor biosynthetic process	5/115	298/17653	0.0454615	0.240506	0.203215	2182/38/10891/60481/4199	5
GO:0002687	positive regulation of leukocyte migration	3/115	123/17653	0.046438	0.243986	0.206155	3576/5054/1906	3
GO:0003158	endothelium development	3/115	123/17653	0.046438	0.243986	0.206155	10630/9076/54345	3
GO:0042476	odontogenesis	3/115	123/17653	0.046438	0.243986	0.206155	5054/3371/1906	3
GO:0035065	regulation of histone acetylation	2/115	53/17653	0.0467411	0.245017	0.207027	10891/195814	2
GO:0002218	activation of innate immune response	5/115	301/17653	0.0470998	0.246126	0.207964	1513/11213/2219/6279/9865	5
GO:0044242	cellular lipid catabolic process	4/115	208/17653	0.0471671	0.246126	0.207964	38/79644/23600/9388	4
GO:0002706	regulation of lymphocyte mediated immunity	3/115	124/17653	0.047371	0.24663	0.208389	722/725/718	3
GO:0001885	endothelial cell development	2/115	54/17653	0.048337	0.250523	0.211679	9076/54345	2
GO:0002011	morphogenesis of an epithelial sheet	2/115	54/17653	0.048337	0.250523	0.211679	10630/4321	2
GO:0045444	fat cell differentiation	4/115	210/17653	0.0485485	0.251053	0.212126	8091/10891/8651/10974	4
GO:0009260	ribonucleotide biosynthetic process	5/115	304/17653	0.048773	0.251083	0.212152	38/79849/10891/4843/2980	5
GO:0050808	synapse organization	5/115	304/17653	0.048773	0.251083	0.212152	3706/27253/27445/3371/10288	5
GO:0034612	response to tumor necrosis factor	5/115	305/17653	0.0493385	0.253182	0.213925	1116/9076/3576/10891/1906	5
GO:0001706	endoderm formation	2/115	55/17653	0.0499526	0.253182	0.213925	8091/4318	2
GO:0030801	positive regulation of cyclic nucleotide metabolic process	2/115	55/17653	0.0499526	0.253182	0.213925	4843/2980	2
GO:0032370	positive regulation of lipid transport	2/115	55/17653	0.0499526	0.253182	0.213925	9388/1906	2
GO:0043388	positive regulation of DNA binding	2/115	55/17653	0.0499526	0.253182	0.213925	8091/4318	2
GO:0045071	negative regulation of viral genome replication	2/115	55/17653	0.0499526	0.253182	0.213925	8091/10581	2
GO:0048662	negative regulation of smooth muscle cell proliferation	2/115	55/17653	0.0499526	0.253182	0.213925	3488/10891	2
GO:0097479	synaptic vesicle localization	3/115	127/17653	0.0502252	0.253444	0.214147	145741/27253/27445	3
GO:1903533	regulation of protein targeting	3/115	127/17653	0.0502252	0.253444	0.214147	1513/2040/5174	3
GO:0072522	purine-containing compound biosynthetic process	5/115	307/17653	0.0504811	0.254177	0.214766	38/79849/10891/4843/2980	5
GO:0046390	ribose phosphate biosynthetic process	5/115	308/17653	0.0510583	0.256107	0.216397	38/79849/10891/4843/2980	5
GO:0045580	regulation of T cell differentiation	3/115	128/17653	0.0511949	0.256107	0.216397	8651/301/10288	3
GO:0050673	epithelial cell proliferation	6/115	409/17653	0.051199	0.256107	0.216397	1001/3488/4321/23213/195814/2152	6
GO:0014888	striated muscle adaptation	2/115	56/17653	0.0515876	0.256931	0.217093	3488/10891	2
GO:0033627	cell adhesion mediated by integrin	2/115	56/17653	0.0515876	0.256931	0.217093	5328/5054	2
GO:0009615	response to virus	5/115	310/17653	0.0522242	0.258978	0.218823	8091/10581/11213/4321/10060	5
GO:0032102	negative regulation of response to external stimulus	5/115	310/17653	0.0522242	0.258978	0.218823	6288/11240/5328/5054/1906	5
GO:2000146	negative regulation of cell motility	5/115	311/17653	0.052813	0.260091	0.219763	3488/11240/10891/23213/5054	5
GO:0043588	skin development	6/115	413/17653	0.053199	0.260091	0.219763	1513/1001/9076/3488/54345/301	6
GO:0002532	production of molecular mediator involved in inflammatory response	2/115	57/17653	0.0532416	0.260091	0.219763	4843/5054	2
GO:0031640	killing of cells of other organism	2/115	57/17653	0.0532416	0.260091	0.219763	4843/4069	2
GO:0044364	disruption of cells of other organism	2/115	57/17653	0.0532416	0.260091	0.219763	4843/4069	2
GO:0051187	cofactor catabolic process	2/115	57/17653	0.0532416	0.260091	0.219763	38/54658	2
GO:1900543	negative regulation of purine nucleotide metabolic process	2/115	57/17653	0.0532416	0.260091	0.219763	79849/10891	2
GO:0052548	regulation of endopeptidase activity	6/115	414/17653	0.0537064	0.261804	0.221211	5274/5054/6279/2152/4318/718	6
GO:0045807	positive regulation of endocytosis	3/115	131/17653	0.0541584	0.262892	0.22213	717/5054/718	3
GO:0046683	response to organophosphorus	3/115	131/17653	0.0541584	0.262892	0.22213	3488/366/343	3
GO:0051896	regulation of protein kinase B signaling	4/115	218/17653	0.0542967	0.263007	0.222227	1116/3488/2261/2152	4
GO:0010517	regulation of phospholipase activity	2/115	58/17653	0.0549143	0.263222	0.222409	2261/301	2
GO:0014823	response to activity	2/115	58/17653	0.0549143	0.263222	0.222409	10891/1906	2
GO:0045980	negative regulation of nucleotide metabolic process	2/115	58/17653	0.0549143	0.263222	0.222409	79849/10891	2
GO:0099175	regulation of postsynapse organization	2/115	58/17653	0.0549143	0.263222	0.222409	3706/10288	2
GO:2000756	regulation of peptidyl-lysine acetylation	2/115	58/17653	0.0549143	0.263222	0.222409	10891/195814	2
GO:1901605	alpha-amino acid metabolic process	4/115	220/17653	0.0557892	0.266858	0.225481	38/587/4843/51074	4
GO:0099504	synaptic vesicle cycle	3/115	133/17653	0.0561791	0.267608	0.226115	145741/27253/27445	3
GO:1902107	positive regulation of leukocyte differentiation	3/115	133/17653	0.0561791	0.267608	0.226115	8651/301/10288	3
GO:0006643	membrane lipid metabolic process	4/115	221/17653	0.0565437	0.268525	0.22689	60481/124976/80235/5476	4
GO:0018149	peptide cross-linking	2/115	59/17653	0.0566054	0.268525	0.22689	7052/301	2
GO:0007586	digestion	3/115	134/17653	0.0572028	0.270799	0.228811	10891/6584/2980	3
GO:0031589	cell-substrate adhesion	5/115	319/17653	0.0576634	0.272418	0.230179	10630/5328/25975/5054/10562	5
GO:0006814	sodium ion transport	4/115	223/17653	0.0580693	0.273772	0.231323	6549/6584/8671/2040	4
GO:0048247	lymphocyte chemotaxis	2/115	60/17653	0.0583147	0.273805	0.231351	6288/11240	2
GO:0071277	cellular response to calcium ion	2/115	60/17653	0.0583147	0.273805	0.231351	63928/1906	2
GO:0006633	fatty acid biosynthetic process	3/115	136/17653	0.0592768	0.277288	0.234294	60481/1906/301	3
GO:0050708	regulation of protein secretion	6/115	426/17653	0.060026	0.277288	0.234294	6288/4321/4843/8651/2219/301	6
GO:0010631	epithelial cell migration	5/115	324/17653	0.0608212	0.277288	0.234294	54566/54345/1906/301/4318	5
GO:1905952	regulation of lipid localization	3/115	138/17653	0.061386	0.277288	0.234294	9388/1906/718	3
GO:0002548	monocyte chemotaxis	2/115	62/17653	0.0617863	0.277288	0.234294	5054/301	2
GO:0072091	regulation of stem cell proliferation	2/115	62/17653	0.0617863	0.277288	0.234294	8091/54345	2
GO:0090132	epithelium migration	5/115	327/17653	0.0627625	0.277288	0.234294	54566/54345/1906/301/4318	5
GO:0002664	regulation of T cell tolerance induction	1/115	10/17653	0.0632835	0.277288	0.234294	10288	1
GO:0002863	positive regulation of inflammatory response to antigenic stimulus	1/115	10/17653	0.0632835	0.277288	0.234294	718	1
GO:0006621	protein retention in ER lumen	1/115	10/17653	0.0632835	0.277288	0.234294	11015	1
GO:0007168	receptor guanylyl cyclase signaling pathway	1/115	10/17653	0.0632835	0.277288	0.234294	79849	1
GO:0010838	positive regulation of keratinocyte proliferation	1/115	10/17653	0.0632835	0.277288	0.234294	1001	1
GO:0015937	coenzyme A biosynthetic process	1/115	10/17653	0.0632835	0.277288	0.234294	38	1
GO:0019755	one-carbon compound transport	1/115	10/17653	0.0632835	0.277288	0.234294	366	1
GO:0031507	heterochromatin assembly	1/115	10/17653	0.0632835	0.277288	0.234294	8091	1
GO:0032306	regulation of prostaglandin secretion	1/115	10/17653	0.0632835	0.277288	0.234294	1906	1
GO:0032308	positive regulation of prostaglandin secretion	1/115	10/17653	0.0632835	0.277288	0.234294	1906	1
GO:0032429	regulation of phospholipase A2 activity	1/115	10/17653	0.0632835	0.277288	0.234294	301	1
GO:0032836	glomerular basement membrane development	1/115	10/17653	0.0632835	0.277288	0.234294	23213	1
GO:0033629	negative regulation of cell adhesion mediated by integrin	1/115	10/17653	0.0632835	0.277288	0.234294	5054	1
GO:0043129	surfactant homeostasis	1/115	10/17653	0.0632835	0.277288	0.234294	79888	1
GO:0043569	negative regulation of insulin-like growth factor receptor signaling pathway	1/115	10/17653	0.0632835	0.277288	0.234294	3488	1
GO:0045625	regulation of T-helper 1 cell differentiation	1/115	10/17653	0.0632835	0.277288	0.234294	301	1
GO:0046886	positive regulation of hormone biosynthetic process	1/115	10/17653	0.0632835	0.277288	0.234294	10891	1
GO:0051561	positive regulation of mitochondrial calcium ion concentration	1/115	10/17653	0.0632835	0.277288	0.234294	7052	1
GO:0051918	negative regulation of fibrinolysis	1/115	10/17653	0.0632835	0.277288	0.234294	5054	1
GO:0060339	negative regulation of type I interferon-mediated signaling pathway	1/115	10/17653	0.0632835	0.277288	0.234294	4321	1
GO:0060513	prostatic bud formation	1/115	10/17653	0.0632835	0.277288	0.234294	23213	1
GO:0071838	cell proliferation in bone marrow	1/115	10/17653	0.0632835	0.277288	0.234294	8091	1
GO:0071863	regulation of cell proliferation in bone marrow	1/115	10/17653	0.0632835	0.277288	0.234294	8091	1
GO:0072531	pyrimidine-containing compound transmembrane transport	1/115	10/17653	0.0632835	0.277288	0.234294	366	1
GO:1901072	glucosamine-containing compound catabolic process	1/115	10/17653	0.0632835	0.277288	0.234294	1116	1
GO:1901569	fatty acid derivative catabolic process	1/115	10/17653	0.0632835	0.277288	0.234294	38	1
GO:2001198	regulation of dendritic cell differentiation	1/115	10/17653	0.0632835	0.277288	0.234294	10288	1
GO:2001225	regulation of chloride transport	1/115	10/17653	0.0632835	0.277288	0.234294	766	1
GO:1901607	alpha-amino acid biosynthetic process	2/115	63/17653	0.063548	0.277917	0.234825	587/51074	2
GO:0097237	cellular response to toxic substance	4/115	231/17653	0.0643909	0.281067	0.237487	10891/54658/301/10974	4
GO:0006898	receptor-mediated endocytosis	5/115	330/17653	0.0647387	0.28205	0.238317	6288/3576/5054/3426/57007	5
GO:0007588	excretion	2/115	64/17653	0.0653267	0.284072	0.240026	1906/366	2
GO:0090130	tissue migration	5/115	333/17653	0.0667498	0.285515	0.241245	54566/54345/1906/301/4318	5
GO:0032412	regulation of ion transmembrane transporter activity	4/115	234/17653	0.0668512	0.285515	0.241245	10891/2040/4318/5174	4
GO:0050804	modulation of chemical synaptic transmission	5/115	335/17653	0.0681098	0.285515	0.241245	3706/766/27253/1906/10288	5
GO:0099177	regulation of trans-synaptic signaling	5/115	335/17653	0.0681098	0.285515	0.241245	3706/766/27253/1906/10288	5
GO:0052547	regulation of peptidase activity	6/115	441/17653	0.0685272	0.285515	0.241245	5274/5054/6279/2152/4318/718	6
GO:0002718	regulation of cytokine production involved in immune response	2/115	66/17653	0.0689337	0.285515	0.241245	11213/9865	2
GO:0006801	superoxide metabolic process	2/115	66/17653	0.0689337	0.285515	0.241245	4843/1906	2
GO:0044344	cellular response to fibroblast growth factor stimulus	3/115	145/17653	0.0690398	0.285515	0.241245	3576/2261/23213	3
GO:1901861	regulation of muscle tissue development	3/115	145/17653	0.0690398	0.285515	0.241245	3488/10891/1906	3
GO:0001821	histamine secretion	1/115	11/17653	0.0693891	0.285515	0.241245	1906	1
GO:0002523	leukocyte migration involved in inflammatory response	1/115	11/17653	0.0693891	0.285515	0.241245	6279	1
GO:0003157	endocardium development	1/115	11/17653	0.0693891	0.285515	0.241245	54345	1
GO:0006702	androgen biosynthetic process	1/115	11/17653	0.0693891	0.285515	0.241245	79644	1
GO:0010870	positive regulation of receptor biosynthetic process	1/115	11/17653	0.0693891	0.285515	0.241245	1906	1
GO:0015791	polyol transport	1/115	11/17653	0.0693891	0.285515	0.241245	366	1
GO:0032494	response to peptidoglycan	1/115	11/17653	0.0693891	0.285515	0.241245	11213	1
GO:0042178	xenobiotic catabolic process	1/115	11/17653	0.0693891	0.285515	0.241245	54658	1
GO:0042482	positive regulation of odontogenesis	1/115	11/17653	0.0693891	0.285515	0.241245	1906	1
GO:0042532	negative regulation of tyrosine phosphorylation of STAT protein	1/115	11/17653	0.0693891	0.285515	0.241245	8651	1
GO:0045472	response to ether	1/115	11/17653	0.0693891	0.285515	0.241245	10891	1
GO:0045628	regulation of T-helper 2 cell differentiation	1/115	11/17653	0.0693891	0.285515	0.241245	301	1
GO:0045722	positive regulation of gluconeogenesis	1/115	11/17653	0.0693891	0.285515	0.241245	10891	1
GO:0045793	positive regulation of cell size	1/115	11/17653	0.0693891	0.285515	0.241245	1906	1
GO:0046689	response to mercury ion	1/115	11/17653	0.0693891	0.285515	0.241245	366	1
GO:0051451	myoblast migration	1/115	11/17653	0.0693891	0.285515	0.241245	301	1
GO:0052697	xenobiotic glucuronidation	1/115	11/17653	0.0693891	0.285515	0.241245	54658	1
GO:0060340	positive regulation of type I interferon-mediated signaling pathway	1/115	11/17653	0.0693891	0.285515	0.241245	4321	1
GO:0070673	response to interleukin-18	1/115	11/17653	0.0693891	0.285515	0.241245	9076	1
GO:0071372	cellular response to follicle-stimulating hormone stimulus	1/115	11/17653	0.0693891	0.285515	0.241245	10891	1
GO:2000392	regulation of lamellipodium morphogenesis	1/115	11/17653	0.0693891	0.285515	0.241245	10630	1
GO:0007187	G-protein coupled receptor signaling pathway, coupled to cyclic nucleotide second messenger	4/115	238/17653	0.0702071	0.28683	0.242357	6751/7433/1906/301	4
GO:0043647	inositol phosphate metabolic process	2/115	67/17653	0.0707613	0.28683	0.242357	3706/5333	2
GO:0009187	cyclic nucleotide metabolic process	3/115	147/17653	0.0713028	0.28683	0.242357	79849/4843/2980	3
GO:0051271	negative regulation of cellular component movement	5/115	340/17653	0.0715773	0.28683	0.242357	3488/11240/10891/23213/5054	5
GO:0022898	regulation of transmembrane transporter activity	4/115	240/17653	0.0719172	0.28683	0.242357	10891/2040/4318/5174	4
GO:0014743	regulation of muscle hypertrophy	2/115	68/17653	0.0726048	0.28683	0.242357	3488/1906	2
GO:0030104	water homeostasis	2/115	68/17653	0.0726048	0.28683	0.242357	9076/366	2
GO:0098742	cell-cell adhesion via plasma-membrane adhesion molecules	4/115	242/17653	0.0736486	0.28683	0.242357	9073/1001/9076/27253	4
GO:0006809	nitric oxide biosynthetic process	2/115	69/17653	0.0744638	0.28683	0.242357	4843/1906	2
GO:0006970	response to osmotic stress	2/115	69/17653	0.0744638	0.28683	0.242357	9076/366	2
GO:1901983	regulation of protein acetylation	2/115	69/17653	0.0744638	0.28683	0.242357	10891/195814	2
GO:1902653	secondary alcohol biosynthetic process	2/115	69/17653	0.0744638	0.28683	0.242357	38/3158	2
GO:2001021	negative regulation of response to DNA damage stimulus	2/115	69/17653	0.0744638	0.28683	0.242357	8091/57007	2
GO:0030072	peptide hormone secretion	4/115	243/17653	0.0745222	0.28683	0.242357	4843/27445/1906/301	4
GO:0010212	response to ionizing radiation	3/115	150/17653	0.0747594	0.28683	0.242357	8091/121457/301	3
GO:0001867	complement activation, lectin pathway	1/115	12/17653	0.0754554	0.28683	0.242357	2219	1
GO:0002517	T cell tolerance induction	1/115	12/17653	0.0754554	0.28683	0.242357	10288	1
GO:0002864	regulation of acute inflammatory response to antigenic stimulus	1/115	12/17653	0.0754554	0.28683	0.242357	718	1
GO:0003376	sphingosine-1-phosphate signaling pathway	1/115	12/17653	0.0754554	0.28683	0.242357	124976	1
GO:0006020	inositol metabolic process	1/115	12/17653	0.0754554	0.28683	0.242357	3706	1
GO:0006527	arginine catabolic process	1/115	12/17653	0.0754554	0.28683	0.242357	4843	1
GO:0009086	methionine biosynthetic process	1/115	12/17653	0.0754554	0.28683	0.242357	51074	1
GO:0010755	regulation of plasminogen activation	1/115	12/17653	0.0754554	0.28683	0.242357	5054	1
GO:0010935	regulation of macrophage cytokine production	1/115	12/17653	0.0754554	0.28683	0.242357	11213	1
GO:0014831	gastro-intestinal system smooth muscle contraction	1/115	12/17653	0.0754554	0.28683	0.242357	23213	1
GO:0019934	cGMP-mediated signaling	1/115	12/17653	0.0754554	0.28683	0.242357	79849	1
GO:0030497	fatty acid elongation	1/115	12/17653	0.0754554	0.28683	0.242357	60481	1
GO:0032119	sequestering of zinc ion	1/115	12/17653	0.0754554	0.28683	0.242357	6279	1
GO:0034384	high-density lipoprotein particle clearance	1/115	12/17653	0.0754554	0.28683	0.242357	9388	1
GO:0034392	negative regulation of smooth muscle cell apoptotic process	1/115	12/17653	0.0754554	0.28683	0.242357	1906	1
GO:0035404	histone-serine phosphorylation	1/115	12/17653	0.0754554	0.28683	0.242357	8091	1
GO:0043201	response to leucine	1/115	12/17653	0.0754554	0.28683	0.242357	10891	1
GO:0043922	negative regulation by host of viral transcription	1/115	12/17653	0.0754554	0.28683	0.242357	8091	1
GO:0045820	negative regulation of glycolytic process	1/115	12/17653	0.0754554	0.28683	0.242357	10891	1
GO:0048875	chemical homeostasis within a tissue	1/115	12/17653	0.0754554	0.28683	0.242357	79888	1
GO:0051198	negative regulation of coenzyme metabolic process	1/115	12/17653	0.0754554	0.28683	0.242357	10891	1
GO:0051608	histamine transport	1/115	12/17653	0.0754554	0.28683	0.242357	1906	1
GO:0051712	positive regulation of killing of cells of other organism	1/115	12/17653	0.0754554	0.28683	0.242357	4843	1
GO:0060456	positive regulation of digestive system process	1/115	12/17653	0.0754554	0.28683	0.242357	6584	1
GO:0061042	vascular wound healing	1/115	12/17653	0.0754554	0.28683	0.242357	5054	1
GO:0061684	chaperone-mediated autophagy	1/115	12/17653	0.0754554	0.28683	0.242357	5476	1
GO:0070269	pyroptosis	1/115	12/17653	0.0754554	0.28683	0.242357	51074	1
GO:0070486	leukocyte aggregation	1/115	12/17653	0.0754554	0.28683	0.242357	6279	1
GO:0090520	sphingolipid mediated signaling pathway	1/115	12/17653	0.0754554	0.28683	0.242357	124976	1
GO:0099133	ATP hydrolysis coupled anion transmembrane transport	1/115	12/17653	0.0754554	0.28683	0.242357	10060	1
GO:1900452	regulation of long term synaptic depression	1/115	12/17653	0.0754554	0.28683	0.242357	10288	1
GO:0051262	protein tetramerization	3/115	151/17653	0.075928	0.28815	0.243472	140803/51074/4199	3
GO:0051091	positive regulation of DNA binding transcription factor activity	4/115	245/17653	0.0762853	0.288751	0.24398	11213/10891/6279/1906	4
GO:0001895	retina homeostasis	2/115	70/17653	0.0763379	0.288751	0.24398	1001/4069	2
GO:0006836	neurotransmitter transport	4/115	246/17653	0.0771747	0.291436	0.246248	145741/11254/27445/1906	4
GO:0045454	cell redox homeostasis	2/115	71/17653	0.078227	0.294351	0.248711	4843/79770	2
GO:0051851	modification by host of symbiont morphology or physiology	2/115	71/17653	0.078227	0.294351	0.248711	8091/2040	2
GO:0051650	establishment of vesicle localization	4/115	249/17653	0.0798744	0.294351	0.248711	1001/145741/27445/26286	4
GO:0032652	regulation of interleukin-1 production	2/115	72/17653	0.0801308	0.294351	0.248711	6288/301	2
GO:0040013	negative regulation of locomotion	5/115	353/17653	0.0810405	0.294351	0.248711	3488/11240/10891/23213/5054	5
GO:0006703	estrogen biosynthetic process	1/115	13/17653	0.0814824	0.294351	0.248711	79154	1
GO:0009437	carnitine metabolic process	1/115	13/17653	0.0814824	0.294351	0.248711	6584	1
GO:0010566	regulation of ketone biosynthetic process	1/115	13/17653	0.0814824	0.294351	0.248711	10891	1
GO:0014745	negative regulation of muscle adaptation	1/115	13/17653	0.0814824	0.294351	0.248711	3488	1
GO:0014889	muscle atrophy	1/115	13/17653	0.0814824	0.294351	0.248711	10891	1
GO:0018158	protein oxidation	1/115	13/17653	0.0814824	0.294351	0.248711	129293	1
GO:0032230	positive regulation of synaptic transmission, GABAergic	1/115	13/17653	0.0814824	0.294351	0.248711	766	1
GO:0032352	positive regulation of hormone metabolic process	1/115	13/17653	0.0814824	0.294351	0.248711	10891	1
GO:0035437	maintenance of protein localization in endoplasmic reticulum	1/115	13/17653	0.0814824	0.294351	0.248711	11015	1
GO:0035810	positive regulation of urine volume	1/115	13/17653	0.0814824	0.294351	0.248711	1906	1
GO:0035815	positive regulation of renal sodium excretion	1/115	13/17653	0.0814824	0.294351	0.248711	1906	1
GO:0036109	alpha-linolenic acid metabolic process	1/115	13/17653	0.0814824	0.294351	0.248711	60481	1
GO:0042574	retinal metabolic process	1/115	13/17653	0.0814824	0.294351	0.248711	195814	1
GO:0042761	very long-chain fatty acid biosynthetic process	1/115	13/17653	0.0814824	0.294351	0.248711	60481	1
GO:0042976	activation of Janus kinase activity	1/115	13/17653	0.0814824	0.294351	0.248711	8651	1
GO:0044794	positive regulation by host of viral process	1/115	13/17653	0.0814824	0.294351	0.248711	2040	1
GO:0050746	regulation of lipoprotein metabolic process	1/115	13/17653	0.0814824	0.294351	0.248711	9388	1
GO:0051709	regulation of killing of cells of other organism	1/115	13/17653	0.0814824	0.294351	0.248711	4843	1
GO:0060601	lateral sprouting from an epithelium	1/115	13/17653	0.0814824	0.294351	0.248711	23213	1
GO:0061051	positive regulation of cell growth involved in cardiac muscle cell development	1/115	13/17653	0.0814824	0.294351	0.248711	1906	1
GO:0071481	cellular response to X-ray	1/115	13/17653	0.0814824	0.294351	0.248711	8091	1
GO:1903726	negative regulation of phospholipid metabolic process	1/115	13/17653	0.0814824	0.294351	0.248711	79888	1
GO:0010951	negative regulation of endopeptidase activity	4/115	251/17653	0.0817002	0.294351	0.248711	5274/5054/4318/718	4
GO:0045619	regulation of lymphocyte differentiation	3/115	156/17653	0.0818916	0.294351	0.248711	8651/301/10288	3
GO:0006635	fatty acid beta-oxidation	2/115	73/17653	0.082049	0.294351	0.248711	38/23600	2
GO:0046209	nitric oxide metabolic process	2/115	73/17653	0.082049	0.294351	0.248711	4843/1906	2
GO:0050805	negative regulation of synaptic transmission	2/115	73/17653	0.082049	0.294351	0.248711	27253/10288	2
GO:0043491	protein kinase B signaling	4/115	252/17653	0.0826208	0.29594	0.250054	1116/3488/2261/2152	4
GO:0016126	sterol biosynthetic process	2/115	74/17653	0.0839813	0.299749	0.253273	38/3158	2
GO:1903725	regulation of phospholipid metabolic process	2/115	74/17653	0.0839813	0.299749	0.253273	79888/2261	2
GO:0032409	regulation of transporter activity	4/115	255/17653	0.0854135	0.299749	0.253273	10891/2040/4318/5174	4
GO:2001242	regulation of intrinsic apoptotic signaling pathway	3/115	159/17653	0.0855644	0.299749	0.253273	6279/57007/4318	3
GO:2001257	regulation of cation channel activity	3/115	159/17653	0.0855644	0.299749	0.253273	10891/2040/4318	3
GO:0051702	interaction with symbiont	2/115	75/17653	0.0859275	0.299749	0.253273	8091/2040	2
GO:0022409	positive regulation of cell-cell adhesion	4/115	257/17653	0.0873009	0.299749	0.253273	10630/8651/301/10288	4
GO:0001780	neutrophil homeostasis	1/115	14/17653	0.0874705	0.299749	0.253273	301	1
GO:0002829	negative regulation of type 2 immune response	1/115	14/17653	0.0874705	0.299749	0.253273	301	1
GO:0006012	galactose metabolic process	1/115	14/17653	0.0874705	0.299749	0.253273	10891	1
GO:0006957	complement activation, alternative pathway	1/115	14/17653	0.0874705	0.299749	0.253273	718	1
GO:0010310	regulation of hydrogen peroxide metabolic process	1/115	14/17653	0.0874705	0.299749	0.253273	4314	1
GO:0010893	positive regulation of steroid biosynthetic process	1/115	14/17653	0.0874705	0.299749	0.253273	10891	1
GO:0010934	macrophage cytokine production	1/115	14/17653	0.0874705	0.299749	0.253273	11213	1
GO:0016114	terpenoid biosynthetic process	1/115	14/17653	0.0874705	0.299749	0.253273	3158	1
GO:0030812	negative regulation of nucleotide catabolic process	1/115	14/17653	0.0874705	0.299749	0.253273	10891	1
GO:0035864	response to potassium ion	1/115	14/17653	0.0874705	0.299749	0.253273	10891	1
GO:0043455	regulation of secondary metabolic process	1/115	14/17653	0.0874705	0.299749	0.253273	1001	1
GO:0044849	estrous cycle	1/115	14/17653	0.0874705	0.299749	0.253273	301	1
GO:0045064	T-helper 2 cell differentiation	1/115	14/17653	0.0874705	0.299749	0.253273	301	1
GO:0045623	negative regulation of T-helper cell differentiation	1/115	14/17653	0.0874705	0.299749	0.253273	301	1
GO:0046348	amino sugar catabolic process	1/115	14/17653	0.0874705	0.299749	0.253273	1116	1
GO:0050930	induction of positive chemotaxis	1/115	14/17653	0.0874705	0.299749	0.253273	3576	1
GO:0051917	regulation of fibrinolysis	1/115	14/17653	0.0874705	0.299749	0.253273	5054	1
GO:0070672	response to interleukin-15	1/115	14/17653	0.0874705	0.299749	0.253273	2182	1
GO:0071361	cellular response to ethanol	1/115	14/17653	0.0874705	0.299749	0.253273	54658	1
GO:0072488	ammonium transmembrane transport	1/115	14/17653	0.0874705	0.299749	0.253273	6584	1
GO:0090399	replicative senescence	1/115	14/17653	0.0874705	0.299749	0.253273	5054	1
GO:1990845	adaptive thermogenesis	1/115	14/17653	0.0874705	0.299749	0.253273	10891	1
GO:1904035	regulation of epithelial cell apoptotic process	2/115	76/17653	0.0878874	0.300282	0.253722	10891/5054	2
GO:2001057	reactive nitrogen species metabolic process	2/115	76/17653	0.0878874	0.300282	0.253722	4843/1906	2
GO:0002793	positive regulation of peptide secretion	4/115	259/17653	0.0892085	0.304226	0.257055	6288/4321/2219/6279	4
GO:0034614	cellular response to reactive oxygen species	3/115	162/17653	0.0893066	0.304226	0.257055	301/4318/4314	3
GO:0002824	positive regulation of adaptive immune response based on somatic recombination of immune receptors built from immunoglobulin superfamily domains	2/115	77/17653	0.0898606	0.304244	0.25707	301/718	2
GO:0007422	peripheral nervous system development	2/115	77/17653	0.0898606	0.304244	0.25707	9076/5274	2
GO:0031100	animal organ regeneration	2/115	77/17653	0.0898606	0.304244	0.25707	9076/54658	2
GO:0042509	regulation of tyrosine phosphorylation of STAT protein	2/115	77/17653	0.0898606	0.304244	0.25707	2261/8651	2
GO:1902275	regulation of chromatin organization	3/115	163/17653	0.0905692	0.304244	0.25707	11240/10891/195814	3
GO:0033157	regulation of intracellular protein transport	4/115	261/17653	0.0911363	0.304244	0.25707	1513/63928/2040/5174	4
GO:0006665	sphingolipid metabolic process	3/115	164/17653	0.0918393	0.304244	0.25707	60481/124976/5476	3
GO:0001570	vasculogenesis	2/115	78/17653	0.0918469	0.304244	0.25707	54345/57007	2
GO:0006520	cellular amino acid metabolic process	5/115	367/17653	0.0919447	0.304244	0.25707	38/587/4843/11254/51074	5
GO:0098656	anion transmembrane transport	4/115	263/17653	0.093084	0.304244	0.25707	11254/8671/266675/366	4
GO:0000712	resolution of meiotic recombination intermediates	1/115	15/17653	0.0934198	0.304244	0.25707	56159	1
GO:0002827	positive regulation of T-helper 1 type immune response	1/115	15/17653	0.0934198	0.304244	0.25707	301	1
GO:0002922	positive regulation of humoral immune response	1/115	15/17653	0.0934198	0.304244	0.25707	718	1
GO:0009109	coenzyme catabolic process	1/115	15/17653	0.0934198	0.304244	0.25707	38	1
GO:0010715	regulation of extracellular matrix disassembly	1/115	15/17653	0.0934198	0.304244	0.25707	10630	1
GO:0014733	regulation of skeletal muscle adaptation	1/115	15/17653	0.0934198	0.304244	0.25707	3488	1
GO:0014874	response to stimulus involved in regulation of muscle adaptation	1/115	15/17653	0.0934198	0.304244	0.25707	10891	1
GO:0015936	coenzyme A metabolic process	1/115	15/17653	0.0934198	0.304244	0.25707	38	1
GO:0016998	cell wall macromolecule catabolic process	1/115	15/17653	0.0934198	0.304244	0.25707	4069	1
GO:0032305	positive regulation of icosanoid secretion	1/115	15/17653	0.0934198	0.304244	0.25707	1906	1
GO:0033540	fatty acid beta-oxidation using acyl-CoA oxidase	1/115	15/17653	0.0934198	0.304244	0.25707	23600	1
GO:0043371	negative regulation of CD4-positive, alpha-beta T cell differentiation	1/115	15/17653	0.0934198	0.304244	0.25707	301	1
GO:0044827	modulation by host of viral genome replication	1/115	15/17653	0.0934198	0.304244	0.25707	2040	1
GO:0046321	positive regulation of fatty acid oxidation	1/115	15/17653	0.0934198	0.304244	0.25707	10891	1
GO:0070365	hepatocyte differentiation	1/115	15/17653	0.0934198	0.304244	0.25707	301	1
GO:0097106	postsynaptic density organization	1/115	15/17653	0.0934198	0.304244	0.25707	10288	1
GO:0098719	sodium ion import across plasma membrane	1/115	15/17653	0.0934198	0.304244	0.25707	6549	1
GO:0099084	postsynaptic specialization organization	1/115	15/17653	0.0934198	0.304244	0.25707	10288	1
GO:2000484	positive regulation of interleukin-8 secretion	1/115	15/17653	0.0934198	0.304244	0.25707	2219	1
GO:2001032	regulation of double-strand break repair via nonhomologous end joining	1/115	15/17653	0.0934198	0.304244	0.25707	8091	1
GO:2001170	negative regulation of ATP biosynthetic process	1/115	15/17653	0.0934198	0.304244	0.25707	10891	1
GO:0007492	endoderm development	2/115	79/17653	0.093846	0.304767	0.257512	8091/4318	2
GO:0071674	mononuclear cell migration	2/115	79/17653	0.093846	0.304767	0.257512	5054/301	2
GO:0010466	negative regulation of peptidase activity	4/115	264/17653	0.0940654	0.305048	0.25775	5274/5054/4318/718	4
GO:0010565	regulation of cellular ketone metabolic process	3/115	166/17653	0.0944017	0.305707	0.258306	10891/60481/301	3
GO:0007260	tyrosine phosphorylation of STAT protein	2/115	80/17653	0.0958578	0.309114	0.261186	2261/8651	2
GO:0045682	regulation of epidermis development	2/115	80/17653	0.0958578	0.309114	0.261186	1513/1001	2
GO:0046427	positive regulation of JAK-STAT cascade	2/115	80/17653	0.0958578	0.309114	0.261186	2261/8651	2
GO:0002703	regulation of leukocyte mediated immunity	3/115	168/17653	0.0969935	0.310016	0.261948	722/725/718	3
GO:0010822	positive regulation of mitochondrion organization	3/115	168/17653	0.0969935	0.310016	0.261948	1513/10891/4318	3
GO:0002821	positive regulation of adaptive immune response	2/115	81/17653	0.0978819	0.310016	0.261948	301/718	2
GO:0008652	cellular amino acid biosynthetic process	2/115	81/17653	0.0978819	0.310016	0.261948	587/51074	2
GO:0010632	regulation of epithelial cell migration	4/115	269/17653	0.0990458	0.310016	0.261948	54566/1906/301/4318	4
GO:0016054	organic acid catabolic process	4/115	269/17653	0.0990458	0.310016	0.261948	38/587/4843/23600	4
GO:0046395	carboxylic acid catabolic process	4/115	269/17653	0.0990458	0.310016	0.261948	38/587/4843/23600	4
GO:0002689	negative regulation of leukocyte chemotaxis	1/115	16/17653	0.0993307	0.310016	0.261948	11240	1
GO:0007567	parturition	1/115	16/17653	0.0993307	0.310016	0.261948	1906	1
GO:0032695	negative regulation of interleukin-12 production	1/115	16/17653	0.0993307	0.310016	0.261948	11213	1
GO:0033866	nucleoside bisphosphate biosynthetic process	1/115	16/17653	0.0993307	0.310016	0.261948	38	1
GO:0034030	ribonucleoside bisphosphate biosynthetic process	1/115	16/17653	0.0993307	0.310016	0.261948	38	1
GO:0034033	purine nucleoside bisphosphate biosynthetic process	1/115	16/17653	0.0993307	0.310016	0.261948	38	1
GO:0048070	regulation of developmental pigmentation	1/115	16/17653	0.0993307	0.310016	0.261948	124976	1
GO:0048820	hair follicle maturation	1/115	16/17653	0.0993307	0.310016	0.261948	1001	1
GO:0060192	negative regulation of lipase activity	1/115	16/17653	0.0993307	0.310016	0.261948	301	1
GO:0070828	heterochromatin organization	1/115	16/17653	0.0993307	0.310016	0.261948	8091	1
GO:0071071	regulation of phospholipid biosynthetic process	1/115	16/17653	0.0993307	0.310016	0.261948	79888	1
GO:0071732	cellular response to nitric oxide	1/115	16/17653	0.0993307	0.310016	0.261948	4314	1
GO:0071871	response to epinephrine	1/115	16/17653	0.0993307	0.310016	0.261948	10891	1
GO:0072148	epithelial cell fate commitment	1/115	16/17653	0.0993307	0.310016	0.261948	10630	1
GO:1903209	positive regulation of oxidative stress-induced cell death	1/115	16/17653	0.0993307	0.310016	0.261948	4314	1
GO:2000193	positive regulation of fatty acid transport	1/115	16/17653	0.0993307	0.310016	0.261948	1906	1
GO:1903708	positive regulation of hemopoiesis	3/115	170/17653	0.0996142	0.310016	0.261948	8651/301/10288	3
GO:0032612	interleukin-1 production	2/115	82/17653	0.0999182	0.310016	0.261948	6288/301	2
GO:0045833	negative regulation of lipid metabolic process	2/115	82/17653	0.0999182	0.310016	0.261948	79888/54658	2
GO:0050810	regulation of steroid biosynthetic process	2/115	82/17653	0.0999182	0.310016	0.261948	3490/10891	2
GO:1904894	positive regulation of STAT cascade	2/115	82/17653	0.0999182	0.310016	0.261948	2261/8651	2
GO:0009895	negative regulation of catabolic process	4/115	270/17653	0.100056	0.310027	0.261956	11213/10891/4843/5476	4
GO:0019722	calcium-mediated signaling	3/115	171/17653	0.100935	0.310073	0.261996	63928/3576/1906	3
GO:0006890	retrograde vesicle-mediated transport, Golgi to ER	2/115	83/17653	0.101966	0.310073	0.261996	26286/11015	2
GO:0031058	positive regulation of histone modification	2/115	83/17653	0.101966	0.310073	0.261996	10891/195814	2
GO:0045017	glycerolipid biosynthetic process	4/115	272/17653	0.102092	0.310073	0.261996	79888/2261/80235/718	4
GO:0043112	receptor metabolic process	3/115	172/17653	0.102263	0.310073	0.261996	3576/1906/57007	3
GO:0043901	negative regulation of multi-organism process	3/115	172/17653	0.102263	0.310073	0.261996	8091/10581/2219	3
GO:0000422	autophagy of mitochondrion	2/115	84/17653	0.104026	0.310073	0.261996	1513/10891	2
GO:0001776	leukocyte homeostasis	2/115	84/17653	0.104026	0.310073	0.261996	124976/301	2
GO:0060191	regulation of lipase activity	2/115	84/17653	0.104026	0.310073	0.261996	2261/301	2
GO:0061726	mitochondrion disassembly	2/115	84/17653	0.104026	0.310073	0.261996	1513/10891	2
GO:1901863	positive regulation of muscle tissue development	2/115	84/17653	0.104026	0.310073	0.261996	10891/1906	2
GO:0071466	cellular response to xenobiotic stimulus	3/115	174/17653	0.104941	0.310073	0.261996	8824/10891/54658	3
GO:0000097	sulfur amino acid biosynthetic process	1/115	17/17653	0.105203	0.310073	0.261996	51074	1
GO:0002577	regulation of antigen processing and presentation	1/115	17/17653	0.105203	0.310073	0.261996	10288	1
GO:0006577	amino-acid betaine metabolic process	1/115	17/17653	0.105203	0.310073	0.261996	6584	1
GO:0016254	preassembly of GPI anchor in ER membrane	1/115	17/17653	0.105203	0.310073	0.261996	80235	1
GO:0031065	positive regulation of histone deacetylation	1/115	17/17653	0.105203	0.310073	0.261996	195814	1
GO:0032303	regulation of icosanoid secretion	1/115	17/17653	0.105203	0.310073	0.261996	1906	1
GO:0032354	response to follicle-stimulating hormone	1/115	17/17653	0.105203	0.310073	0.261996	10891	1
GO:0032717	negative regulation of interleukin-8 production	1/115	17/17653	0.105203	0.310073	0.261996	301	1
GO:0034375	high-density lipoprotein particle remodeling	1/115	17/17653	0.105203	0.310073	0.261996	9388	1
GO:0035067	negative regulation of histone acetylation	1/115	17/17653	0.105203	0.310073	0.261996	195814	1
GO:0035313	wound healing, spreading of epidermal cells	1/115	17/17653	0.105203	0.310073	0.261996	4321	1
GO:0042438	melanin biosynthetic process	1/115	17/17653	0.105203	0.310073	0.261996	1001	1
GO:0042448	progesterone metabolic process	1/115	17/17653	0.105203	0.310073	0.261996	10891	1
GO:0042753	positive regulation of circadian rhythm	1/115	17/17653	0.105203	0.310073	0.261996	56938	1
GO:0043651	linoleic acid metabolic process	1/115	17/17653	0.105203	0.310073	0.261996	60481	1
GO:0044036	cell wall macromolecule metabolic process	1/115	17/17653	0.105203	0.310073	0.261996	4069	1
GO:0045063	T-helper 1 cell differentiation	1/115	17/17653	0.105203	0.310073	0.261996	301	1
GO:0045683	negative regulation of epidermis development	1/115	17/17653	0.105203	0.310073	0.261996	1001	1
GO:0060572	morphogenesis of an epithelial bud	1/115	17/17653	0.105203	0.310073	0.261996	23213	1
GO:0070884	regulation of calcineurin-NFAT signaling cascade	1/115	17/17653	0.105203	0.310073	0.261996	63928	1
GO:0071554	cell wall organization or biogenesis	1/115	17/17653	0.105203	0.310073	0.261996	4069	1
GO:0072673	lamellipodium morphogenesis	1/115	17/17653	0.105203	0.310073	0.261996	10630	1
GO:0090026	positive regulation of monocyte chemotaxis	1/115	17/17653	0.105203	0.310073	0.261996	5054	1
GO:0097067	cellular response to thyroid hormone stimulus	1/115	17/17653	0.105203	0.310073	0.261996	10891	1
GO:0106056	regulation of calcineurin-mediated signaling	1/115	17/17653	0.105203	0.310073	0.261996	63928	1
GO:2000774	positive regulation of cellular senescence	1/115	17/17653	0.105203	0.310073	0.261996	8091	1
GO:0002367	cytokine production involved in immune response	2/115	85/17653	0.106097	0.311508	0.263208	11213/9865	2
GO:0007215	glutamate receptor signaling pathway	2/115	85/17653	0.106097	0.311508	0.263208	6751/10891	2
GO:0042475	odontogenesis of dentin-containing tooth	2/115	85/17653	0.106097	0.311508	0.263208	5054/3371	2
GO:0034446	substrate adhesion-dependent cell spreading	2/115	86/17653	0.10818	0.316307	0.267263	10630/10562	2
GO:0051047	positive regulation of secretion	5/115	388/17653	0.109646	0.316307	0.267263	6288/4321/2219/6279/1906	5
GO:0006582	melanin metabolic process	1/115	18/17653	0.111038	0.316307	0.267263	1001	1
GO:0007250	activation of NF-kappaB-inducing kinase activity	1/115	18/17653	0.111038	0.316307	0.267263	1116	1
GO:0010866	regulation of triglyceride biosynthetic process	1/115	18/17653	0.111038	0.316307	0.267263	718	1
GO:0030277	maintenance of gastrointestinal epithelium	1/115	18/17653	0.111038	0.316307	0.267263	6584	1
GO:0031000	response to caffeine	1/115	18/17653	0.111038	0.316307	0.267263	10891	1
GO:0032042	mitochondrial DNA metabolic process	1/115	18/17653	0.111038	0.316307	0.267263	10891	1
GO:0035635	entry of bacterium into host cell	1/115	18/17653	0.111038	0.316307	0.267263	3576	1
GO:0036148	phosphatidylglycerol acyl-chain remodeling	1/115	18/17653	0.111038	0.316307	0.267263	79888	1
GO:0036270	response to diuretic	1/115	18/17653	0.111038	0.316307	0.267263	10891	1
GO:0044342	type B pancreatic cell proliferation	1/115	18/17653	0.111038	0.316307	0.267263	3488	1
GO:0046639	negative regulation of alpha-beta T cell differentiation	1/115	18/17653	0.111038	0.316307	0.267263	301	1
GO:0051767	nitric-oxide synthase biosynthetic process	1/115	18/17653	0.111038	0.316307	0.267263	1906	1
GO:0051769	regulation of nitric-oxide synthase biosynthetic process	1/115	18/17653	0.111038	0.316307	0.267263	1906	1
GO:0061003	positive regulation of dendritic spine morphogenesis	1/115	18/17653	0.111038	0.316307	0.267263	3706	1
GO:0070633	transepithelial transport	1/115	18/17653	0.111038	0.316307	0.267263	1906	1
GO:0070977	bone maturation	1/115	18/17653	0.111038	0.316307	0.267263	2261	1
GO:0071371	cellular response to gonadotropin stimulus	1/115	18/17653	0.111038	0.316307	0.267263	10891	1
GO:0090330	regulation of platelet aggregation	1/115	18/17653	0.111038	0.316307	0.267263	10630	1
GO:0097062	dendritic spine maintenance	1/115	18/17653	0.111038	0.316307	0.267263	3706	1
GO:1900409	positive regulation of cellular response to oxidative stress	1/115	18/17653	0.111038	0.316307	0.267263	4314	1
GO:1903055	positive regulation of extracellular matrix organization	1/115	18/17653	0.111038	0.316307	0.267263	10630	1
GO:2000310	regulation of NMDA receptor activity	1/115	18/17653	0.111038	0.316307	0.267263	10891	1
GO:0016079	synaptic vesicle exocytosis	2/115	88/17653	0.112377	0.319329	0.269816	145741/27445	2
GO:0051196	regulation of coenzyme metabolic process	2/115	88/17653	0.112377	0.319329	0.269816	10891/4199	2
GO:0030258	lipid modification	4/115	282/17653	0.112556	0.319442	0.269912	38/10891/23600/2261	4
GO:0060249	anatomical structure homeostasis	5/115	393/17653	0.114092	0.322132	0.272184	1513/79888/1001/6584/4069	5
GO:0060337	type I interferon signaling pathway	2/115	89/17653	0.114492	0.322132	0.272184	10581/4321	2
GO:0071357	cellular response to type I interferon	2/115	89/17653	0.114492	0.322132	0.272184	10581/4321	2
GO:0032386	regulation of intracellular transport	5/115	395/17653	0.115894	0.322132	0.272184	1513/63928/1001/2040/5174	5
GO:0001523	retinoid metabolic process	2/115	90/17653	0.116616	0.322132	0.272184	195814/54658	2
GO:0060996	dendritic spine development	2/115	90/17653	0.116616	0.322132	0.272184	2182/3706	2
GO:1905269	positive regulation of chromatin organization	2/115	90/17653	0.116616	0.322132	0.272184	10891/195814	2
GO:0002544	chronic inflammatory response	1/115	19/17653	0.116835	0.322132	0.272184	6279	1
GO:0035994	response to muscle stretch	1/115	19/17653	0.116835	0.322132	0.272184	1906	1
GO:0042474	middle ear morphogenesis	1/115	19/17653	0.116835	0.322132	0.272184	1906	1
GO:0042789	mRNA transcription by RNA polymerase II	1/115	19/17653	0.116835	0.322132	0.272184	54345	1
GO:0043691	reverse cholesterol transport	1/115	19/17653	0.116835	0.322132	0.272184	9388	1
GO:0045624	positive regulation of T-helper cell differentiation	1/115	19/17653	0.116835	0.322132	0.272184	301	1
GO:0051238	sequestering of metal ion	1/115	19/17653	0.116835	0.322132	0.272184	6279	1
GO:0051307	meiotic chromosome separation	1/115	19/17653	0.116835	0.322132	0.272184	56159	1
GO:0052695	cellular glucuronidation	1/115	19/17653	0.116835	0.322132	0.272184	54658	1
GO:0061050	regulation of cell growth involved in cardiac muscle cell development	1/115	19/17653	0.116835	0.322132	0.272184	1906	1
GO:0071731	response to nitric oxide	1/115	19/17653	0.116835	0.322132	0.272184	4314	1
GO:0090343	positive regulation of cell aging	1/115	19/17653	0.116835	0.322132	0.272184	8091	1
GO:0097242	amyloid-beta clearance	1/115	19/17653	0.116835	0.322132	0.272184	718	1
GO:0099054	presynapse assembly	1/115	19/17653	0.116835	0.322132	0.272184	27253	1
GO:1902074	response to salt	1/115	19/17653	0.116835	0.322132	0.272184	1906	1
GO:1905331	negative regulation of morphogenesis of an epithelium	1/115	19/17653	0.116835	0.322132	0.272184	23213	1
GO:0034599	cellular response to oxidative stress	4/115	286/17653	0.116871	0.322132	0.272184	10891/301/4318/4314	4
GO:1901654	response to ketone	3/115	183/17653	0.117324	0.322992	0.272912	3490/9076/1906	3
GO:0006919	activation of cysteine-type endopeptidase activity involved in apoptotic process	2/115	91/17653	0.118751	0.32614	0.275571	6279/2152	2
GO:2001023	regulation of response to drug	2/115	91/17653	0.118751	0.32614	0.275571	8091/10974	2
GO:0051341	regulation of oxidoreductase activity	2/115	92/17653	0.120896	0.3273	0.276551	1001/1906	2
GO:0017157	regulation of exocytosis	3/115	186/17653	0.121569	0.3273	0.276551	145741/27445/301	3
GO:0003094	glomerular filtration	1/115	20/17653	0.122595	0.3273	0.276551	23213	1
GO:0006085	acetyl-CoA biosynthetic process	1/115	20/17653	0.122595	0.3273	0.276551	38	1
GO:0006488	dolichol-linked oligosaccharide biosynthetic process	1/115	20/17653	0.122595	0.3273	0.276551	79644	1
GO:0006555	methionine metabolic process	1/115	20/17653	0.122595	0.3273	0.276551	51074	1
GO:0006925	inflammatory cell apoptotic process	1/115	20/17653	0.122595	0.3273	0.276551	301	1
GO:0010869	regulation of receptor biosynthetic process	1/115	20/17653	0.122595	0.3273	0.276551	1906	1
GO:0032373	positive regulation of sterol transport	1/115	20/17653	0.122595	0.3273	0.276551	9388	1
GO:0032376	positive regulation of cholesterol transport	1/115	20/17653	0.122595	0.3273	0.276551	9388	1
GO:0032727	positive regulation of interferon-alpha production	1/115	20/17653	0.122595	0.3273	0.276551	4321	1
GO:0035455	response to interferon-alpha	1/115	20/17653	0.122595	0.3273	0.276551	10581	1
GO:0035809	regulation of urine volume	1/115	20/17653	0.122595	0.3273	0.276551	1906	1
GO:0035812	renal sodium excretion	1/115	20/17653	0.122595	0.3273	0.276551	1906	1
GO:0035813	regulation of renal sodium excretion	1/115	20/17653	0.122595	0.3273	0.276551	1906	1
GO:0051797	regulation of hair follicle development	1/115	20/17653	0.122595	0.3273	0.276551	1001	1
GO:0060602	branch elongation of an epithelium	1/115	20/17653	0.122595	0.3273	0.276551	3371	1
GO:0060716	labyrinthine layer blood vessel development	1/115	20/17653	0.122595	0.3273	0.276551	5333	1
GO:0071305	cellular response to vitamin D	1/115	20/17653	0.122595	0.3273	0.276551	3371	1
GO:0072234	metanephric nephron tubule development	1/115	20/17653	0.122595	0.3273	0.276551	38	1
GO:1902884	positive regulation of response to oxidative stress	1/115	20/17653	0.122595	0.3273	0.276551	4314	1
GO:2000515	negative regulation of CD4-positive, alpha-beta T cell activation	1/115	20/17653	0.122595	0.3273	0.276551	301	1
GO:2000773	negative regulation of cellular senescence	1/115	20/17653	0.122595	0.3273	0.276551	8091	1
GO:2000810	regulation of bicellular tight junction assembly	1/115	20/17653	0.122595	0.3273	0.276551	9076	1
GO:0031348	negative regulation of defense response	3/115	187/17653	0.122997	0.327753	0.276934	6288/11213/4321	3
GO:0031623	receptor internalization	2/115	93/17653	0.12305	0.327753	0.276934	3576/57007	2
GO:0042742	defense response to bacterium	4/115	293/17653	0.124594	0.331481	0.280084	4843/5054/6279/4069	4
GO:0021549	cerebellum development	2/115	94/17653	0.125214	0.33236	0.280826	6751/10891	2
GO:0034340	response to type I interferon	2/115	94/17653	0.125214	0.33236	0.280826	10581/4321	2
GO:0010906	regulation of glucose metabolic process	2/115	95/17653	0.127387	0.332524	0.280965	3488/10891	2
GO:0002021	response to dietary excess	1/115	21/17653	0.128317	0.332524	0.280965	10891	1
GO:0002438	acute inflammatory response to antigenic stimulus	1/115	21/17653	0.128317	0.332524	0.280965	718	1
GO:0002861	regulation of inflammatory response to antigenic stimulus	1/115	21/17653	0.128317	0.332524	0.280965	718	1
GO:0006490	oligosaccharide-lipid intermediate biosynthetic process	1/115	21/17653	0.128317	0.332524	0.280965	79644	1
GO:0006525	arginine metabolic process	1/115	21/17653	0.128317	0.332524	0.280965	4843	1
GO:0007130	synaptonemal complex assembly	1/115	21/17653	0.128317	0.332524	0.280965	56159	1
GO:0014821	phasic smooth muscle contraction	1/115	21/17653	0.128317	0.332524	0.280965	1906	1
GO:0014829	vascular smooth muscle contraction	1/115	21/17653	0.128317	0.332524	0.280965	1906	1
GO:0014850	response to muscle activity	1/115	21/17653	0.128317	0.332524	0.280965	10891	1
GO:0031498	chromatin disassembly	1/115	21/17653	0.128317	0.332524	0.280965	11240	1
GO:0036499	PERK-mediated unfolded protein response	1/115	21/17653	0.128317	0.332524	0.280965	3576	1
GO:0040037	negative regulation of fibroblast growth factor receptor signaling pathway	1/115	21/17653	0.128317	0.332524	0.280965	23213	1
GO:0044321	response to leptin	1/115	21/17653	0.128317	0.332524	0.280965	1906	1
GO:0061436	establishment of skin barrier	1/115	21/17653	0.128317	0.332524	0.280965	9076	1
GO:0071677	positive regulation of mononuclear cell migration	1/115	21/17653	0.128317	0.332524	0.280965	5054	1
GO:0090312	positive regulation of protein deacetylation	1/115	21/17653	0.128317	0.332524	0.280965	195814	1
GO:0097205	renal filtration	1/115	21/17653	0.128317	0.332524	0.280965	23213	1
GO:0099172	presynapse organization	1/115	21/17653	0.128317	0.332524	0.280965	27253	1
GO:1903579	negative regulation of ATP metabolic process	1/115	21/17653	0.128317	0.332524	0.280965	10891	1
GO:2000757	negative regulation of peptidyl-lysine acetylation	1/115	21/17653	0.128317	0.332524	0.280965	195814	1
GO:0042102	positive regulation of T cell proliferation	2/115	96/17653	0.129569	0.335011	0.283067	301/10288	2
GO:2001243	negative regulation of intrinsic apoptotic signaling pathway	2/115	96/17653	0.129569	0.335011	0.283067	57007/4318	2
GO:0050679	positive regulation of epithelial cell proliferation	3/115	192/17653	0.130226	0.336331	0.284183	1001/4321/2152	3
GO:0016101	diterpenoid metabolic process	2/115	97/17653	0.131759	0.337357	0.285049	195814/54658	2
GO:0006641	triglyceride metabolic process	2/115	98/17653	0.133958	0.337357	0.285049	2182/718	2
GO:0042136	neurotransmitter biosynthetic process	2/115	98/17653	0.133958	0.337357	0.285049	4843/1906	2
GO:0042752	regulation of circadian rhythm	2/115	98/17653	0.133958	0.337357	0.285049	10891/56938	2
GO:0043473	pigmentation	2/115	98/17653	0.133958	0.337357	0.285049	1001/124976	2
GO:0002825	regulation of T-helper 1 type immune response	1/115	22/17653	0.134002	0.337357	0.285049	301	1
GO:0002888	positive regulation of myeloid leukocyte mediated immunity	1/115	22/17653	0.134002	0.337357	0.285049	718	1
GO:0003416	endochondral bone growth	1/115	22/17653	0.134002	0.337357	0.285049	2261	1
GO:0006972	hyperosmotic response	1/115	22/17653	0.134002	0.337357	0.285049	9076	1
GO:0009651	response to salt stress	1/115	22/17653	0.134002	0.337357	0.285049	9076	1
GO:0010884	positive regulation of lipid storage	1/115	22/17653	0.134002	0.337357	0.285049	718	1
GO:0010984	regulation of lipoprotein particle clearance	1/115	22/17653	0.134002	0.337357	0.285049	9388	1
GO:0032469	endoplasmic reticulum calcium ion homeostasis	1/115	22/17653	0.134002	0.337357	0.285049	7052	1
GO:0045117	azole transport	1/115	22/17653	0.134002	0.337357	0.285049	1906	1
GO:0048799	animal organ maturation	1/115	22/17653	0.134002	0.337357	0.285049	2261	1
GO:0060055	angiogenesis involved in wound healing	1/115	22/17653	0.134002	0.337357	0.285049	5054	1
GO:0060445	branching involved in salivary gland morphogenesis	1/115	22/17653	0.134002	0.337357	0.285049	7052	1
GO:0061082	myeloid leukocyte cytokine production	1/115	22/17653	0.134002	0.337357	0.285049	11213	1
GO:0071379	cellular response to prostaglandin stimulus	1/115	22/17653	0.134002	0.337357	0.285049	3371	1
GO:0090025	regulation of monocyte chemotaxis	1/115	22/17653	0.134002	0.337357	0.285049	5054	1
GO:1900120	regulation of receptor binding	1/115	22/17653	0.134002	0.337357	0.285049	4318	1
GO:1901623	regulation of lymphocyte chemotaxis	1/115	22/17653	0.134002	0.337357	0.285049	11240	1
GO:1905809	negative regulation of synapse organization	1/115	22/17653	0.134002	0.337357	0.285049	10288	1
GO:1904062	regulation of cation transmembrane transport	4/115	302/17653	0.134835	0.339082	0.286507	10891/2040/4318/5174	4
GO:1904019	epithelial cell apoptotic process	2/115	99/17653	0.136166	0.342054	0.289018	10891/5054	2
GO:0014897	striated muscle hypertrophy	2/115	100/17653	0.138382	0.342929	0.289757	3488/1906	2
GO:0050868	negative regulation of T cell activation	2/115	100/17653	0.138382	0.342929	0.289757	301/10288	2
GO:0046879	hormone secretion	4/115	306/17653	0.139495	0.342929	0.289757	4843/27445/1906/301	4
GO:0007095	mitotic G2 DNA damage checkpoint	1/115	23/17653	0.139651	0.342929	0.289757	8091	1
GO:0009067	aspartate family amino acid biosynthetic process	1/115	23/17653	0.139651	0.342929	0.289757	51074	1
GO:0010288	response to lead ion	1/115	23/17653	0.139651	0.342929	0.289757	9076	1
GO:0010954	positive regulation of protein processing	1/115	23/17653	0.139651	0.342929	0.289757	718	1
GO:0032402	melanosome transport	1/115	23/17653	0.139651	0.342929	0.289757	1001	1
GO:0033561	regulation of water loss via skin	1/115	23/17653	0.139651	0.342929	0.289757	9076	1
GO:0035456	response to interferon-beta	1/115	23/17653	0.139651	0.342929	0.289757	10581	1
GO:0042537	benzene-containing compound metabolic process	1/115	23/17653	0.139651	0.342929	0.289757	54658	1
GO:0044062	regulation of excretion	1/115	23/17653	0.139651	0.342929	0.289757	1906	1
GO:0045940	positive regulation of steroid metabolic process	1/115	23/17653	0.139651	0.342929	0.289757	10891	1
GO:0051560	mitochondrial calcium ion homeostasis	1/115	23/17653	0.139651	0.342929	0.289757	7052	1
GO:0072170	metanephric tubule development	1/115	23/17653	0.139651	0.342929	0.289757	38	1
GO:0072243	metanephric nephron epithelium development	1/115	23/17653	0.139651	0.342929	0.289757	38	1
GO:0090140	regulation of mitochondrial fission	1/115	23/17653	0.139651	0.342929	0.289757	10891	1
GO:2000191	regulation of fatty acid transport	1/115	23/17653	0.139651	0.342929	0.289757	1906	1
GO:2000679	positive regulation of transcription regulatory region DNA binding	1/115	23/17653	0.139651	0.342929	0.289757	8091	1
GO:2000780	negative regulation of double-strand break repair	1/115	23/17653	0.139651	0.342929	0.289757	8091	1
GO:2001267	regulation of cysteine-type endopeptidase activity involved in apoptotic signaling pathway	1/115	23/17653	0.139651	0.342929	0.289757	4318	1
GO:0001505	regulation of neurotransmitter levels	4/115	308/17653	0.14185	0.347318	0.293465	145741/4843/27445/1906	4
GO:0001676	long-chain fatty acid metabolic process	2/115	102/17653	0.142837	0.347318	0.293465	2182/60481	2
GO:0014896	muscle hypertrophy	2/115	102/17653	0.142837	0.347318	0.293465	3488/1906	2
GO:0099173	postsynapse organization	2/115	102/17653	0.142837	0.347318	0.293465	3706/10288	2
GO:0044282	small molecule catabolic process	5/115	425/17653	0.144519	0.347318	0.293465	38/587/79644/4843/23600	5
GO:0022037	metencephalon development	2/115	103/17653	0.145076	0.347318	0.293465	6751/10891	2
GO:0030073	insulin secretion	3/115	202/17653	0.14512	0.347318	0.293465	4843/27445/301	3
GO:0048762	mesenchymal cell differentiation	3/115	202/17653	0.14512	0.347318	0.293465	10630/8091/1906	3
GO:0002227	innate immune response in mucosa	1/115	24/17653	0.145263	0.347318	0.293465	4843	1
GO:0002719	negative regulation of cytokine production involved in immune response	1/115	24/17653	0.145263	0.347318	0.293465	11213	1
GO:0006063	uronic acid metabolic process	1/115	24/17653	0.145263	0.347318	0.293465	54658	1
GO:0010460	positive regulation of heart rate	1/115	24/17653	0.145263	0.347318	0.293465	1906	1
GO:0010640	regulation of platelet-derived growth factor receptor signaling pathway	1/115	24/17653	0.145263	0.347318	0.293465	2152	1
GO:0019585	glucuronate metabolic process	1/115	24/17653	0.145263	0.347318	0.293465	54658	1
GO:0032196	transposition	1/115	24/17653	0.145263	0.347318	0.293465	54596	1
GO:0032401	establishment of melanosome localization	1/115	24/17653	0.145263	0.347318	0.293465	1001	1
GO:0032800	receptor biosynthetic process	1/115	24/17653	0.145263	0.347318	0.293465	1906	1
GO:0032897	negative regulation of viral transcription	1/115	24/17653	0.145263	0.347318	0.293465	8091	1
GO:0042573	retinoic acid metabolic process	1/115	24/17653	0.145263	0.347318	0.293465	54658	1
GO:0051904	pigment granule transport	1/115	24/17653	0.145263	0.347318	0.293465	1001	1
GO:0060330	regulation of response to interferon-gamma	1/115	24/17653	0.145263	0.347318	0.293465	8651	1
GO:0060334	regulation of interferon-gamma-mediated signaling pathway	1/115	24/17653	0.145263	0.347318	0.293465	8651	1
GO:0070193	synaptonemal complex organization	1/115	24/17653	0.145263	0.347318	0.293465	56159	1
GO:0098868	bone growth	1/115	24/17653	0.145263	0.347318	0.293465	2261	1
GO:1901984	negative regulation of protein acetylation	1/115	24/17653	0.145263	0.347318	0.293465	195814	1
GO:0070372	regulation of ERK1 and ERK2 cascade	4/115	311/17653	0.145411	0.347318	0.293465	1116/2261/57007/51074	4
GO:0001667	ameboidal-type cell migration	5/115	426/17653	0.145522	0.347318	0.293465	54566/54345/1906/301/4318	5
GO:0032526	response to retinoic acid	2/115	104/17653	0.147323	0.350885	0.296479	3490/3371	2
GO:1903409	reactive oxygen species biosynthetic process	2/115	104/17653	0.147323	0.350885	0.296479	4843/1906	2
GO:0048608	reproductive structure development	5/115	430/17653	0.149567	0.353394	0.298599	5333/23213/3371/56159/301	5
GO:1903008	organelle disassembly	2/115	105/17653	0.149576	0.353394	0.298599	1513/10891	2
GO:0006700	C21-steroid hormone biosynthetic process	1/115	25/17653	0.150839	0.353394	0.298599	10891	1
GO:0007263	nitric oxide mediated signal transduction	1/115	25/17653	0.150839	0.353394	0.298599	4843	1
GO:0009299	mRNA transcription	1/115	25/17653	0.150839	0.353394	0.298599	54345	1
GO:0010669	epithelial structure maintenance	1/115	25/17653	0.150839	0.353394	0.298599	6584	1
GO:0034110	regulation of homotypic cell-cell adhesion	1/115	25/17653	0.150839	0.353394	0.298599	10630	1
GO:0043372	positive regulation of CD4-positive, alpha-beta T cell differentiation	1/115	25/17653	0.150839	0.353394	0.298599	301	1
GO:0045738	negative regulation of DNA repair	1/115	25/17653	0.150839	0.353394	0.298599	8091	1
GO:0045939	negative regulation of steroid metabolic process	1/115	25/17653	0.150839	0.353394	0.298599	54658	1
GO:0045992	negative regulation of embryonic development	1/115	25/17653	0.150839	0.353394	0.298599	23213	1
GO:0046885	regulation of hormone biosynthetic process	1/115	25/17653	0.150839	0.353394	0.298599	10891	1
GO:0051905	establishment of pigment granule localization	1/115	25/17653	0.150839	0.353394	0.298599	1001	1
GO:0060384	innervation	1/115	25/17653	0.150839	0.353394	0.298599	23213	1
GO:1901071	glucosamine-containing compound metabolic process	1/115	25/17653	0.150839	0.353394	0.298599	1116	1
GO:1903319	positive regulation of protein maturation	1/115	25/17653	0.150839	0.353394	0.298599	718	1
GO:0001655	urogenital system development	4/115	316/17653	0.151423	0.354402	0.299451	38/23213/3371/301	4
GO:0001952	regulation of cell-matrix adhesion	2/115	106/17653	0.151837	0.354647	0.299658	5328/5054	2
GO:0006939	smooth muscle contraction	2/115	106/17653	0.151837	0.354647	0.299658	23213/1906	2
GO:0061458	reproductive system development	5/115	433/17653	0.152631	0.35614	0.300919	5333/23213/3371/56159/301	5
GO:0009914	hormone transport	4/115	318/17653	0.153855	0.357615	0.302166	4843/27445/1906/301	4
GO:0006821	chloride transport	2/115	107/17653	0.154105	0.357615	0.302166	766/266675	2
GO:0010811	positive regulation of cell-substrate adhesion	2/115	107/17653	0.154105	0.357615	0.302166	25975/10562	2
GO:0051817	modification of morphology or physiology of other organism involved in symbiotic interaction	2/115	107/17653	0.154105	0.357615	0.302166	8091/2040	2
GO:0023061	signal release	5/115	435/17653	0.154689	0.357615	0.302166	145741/4843/27445/1906/301	5
GO:0006979	response to oxidative stress	5/115	436/17653	0.155722	0.357615	0.302166	10891/1906/301/4318/4314	5
GO:0009612	response to mechanical stimulus	3/115	209/17653	0.155866	0.357615	0.302166	1116/3371/1906	3
GO:0001958	endochondral ossification	1/115	26/17653	0.156378	0.357615	0.302166	2261	1
GO:0002063	chondrocyte development	1/115	26/17653	0.156378	0.357615	0.302166	23213	1
GO:0018195	peptidyl-arginine modification	1/115	26/17653	0.156378	0.357615	0.302166	11240	1
GO:0031063	regulation of histone deacetylation	1/115	26/17653	0.156378	0.357615	0.302166	195814	1
GO:0032400	melanosome localization	1/115	26/17653	0.156378	0.357615	0.302166	1001	1
GO:0032647	regulation of interferon-alpha production	1/115	26/17653	0.156378	0.357615	0.302166	4321	1
GO:0036075	replacement ossification	1/115	26/17653	0.156378	0.357615	0.302166	2261	1
GO:0042481	regulation of odontogenesis	1/115	26/17653	0.156378	0.357615	0.302166	1906	1
GO:0044788	modulation by host of viral process	1/115	26/17653	0.156378	0.357615	0.302166	2040	1
GO:0060571	morphogenesis of an epithelial fold	1/115	26/17653	0.156378	0.357615	0.302166	23213	1
GO:0090344	negative regulation of cell aging	1/115	26/17653	0.156378	0.357615	0.302166	8091	1
GO:2001171	positive regulation of ATP biosynthetic process	1/115	26/17653	0.156378	0.357615	0.302166	10891	1
GO:0019730	antimicrobial humoral response	2/115	108/17653	0.156379	0.357615	0.302166	6279/4069	2
GO:0032368	regulation of lipid transport	2/115	109/17653	0.158659	0.36247	0.306268	9388/1906	2
GO:0045732	positive regulation of protein catabolic process	3/115	212/17653	0.160546	0.363495	0.307134	79888/722/725	3
GO:0009062	fatty acid catabolic process	2/115	110/17653	0.160946	0.363495	0.307134	38/23600	2
GO:0009649	entrainment of circadian clock	1/115	27/17653	0.161882	0.363495	0.307134	56938	1
GO:0031069	hair follicle morphogenesis	1/115	27/17653	0.161882	0.363495	0.307134	3488	1
GO:0032607	interferon-alpha production	1/115	27/17653	0.161882	0.363495	0.307134	4321	1
GO:0032770	positive regulation of monooxygenase activity	1/115	27/17653	0.161882	0.363495	0.307134	1001	1
GO:0032958	inositol phosphate biosynthetic process	1/115	27/17653	0.161882	0.363495	0.307134	3706	1
GO:0033173	calcineurin-NFAT signaling cascade	1/115	27/17653	0.161882	0.363495	0.307134	63928	1
GO:0036151	phosphatidylcholine acyl-chain remodeling	1/115	27/17653	0.161882	0.363495	0.307134	79888	1
GO:0043921	modulation by host of viral transcription	1/115	27/17653	0.161882	0.363495	0.307134	8091	1
GO:0051875	pigment granule localization	1/115	27/17653	0.161882	0.363495	0.307134	1001	1
GO:0052472	modulation by host of symbiont transcription	1/115	27/17653	0.161882	0.363495	0.307134	8091	1
GO:0072207	metanephric epithelium development	1/115	27/17653	0.161882	0.363495	0.307134	38	1
GO:0072378	blood coagulation, fibrin clot formation	1/115	27/17653	0.161882	0.363495	0.307134	2152	1
GO:0097066	response to thyroid hormone	1/115	27/17653	0.161882	0.363495	0.307134	10891	1
GO:2000036	regulation of stem cell population maintenance	1/115	27/17653	0.161882	0.363495	0.307134	8091	1
GO:2000727	positive regulation of cardiac muscle cell differentiation	1/115	27/17653	0.161882	0.363495	0.307134	1906	1
GO:0050870	positive regulation of T cell activation	3/115	213/17653	0.162116	0.363495	0.307134	8651/301/10288	3
GO:2001234	negative regulation of apoptotic signaling pathway	3/115	213/17653	0.162116	0.363495	0.307134	5054/57007/4318	3
GO:0007569	cell aging	2/115	111/17653	0.16324	0.364944	0.308359	8091/5054	2
GO:0032675	regulation of interleukin-6 production	2/115	111/17653	0.16324	0.364944	0.308359	11213/10288	2
GO:0072089	stem cell proliferation	2/115	111/17653	0.16324	0.364944	0.308359	8091/54345	2
GO:1903038	negative regulation of leukocyte cell-cell adhesion	2/115	112/17653	0.165539	0.367691	0.310679	301/10288	2
GO:0070371	ERK1 and ERK2 cascade	4/115	328/17653	0.166234	0.367691	0.310679	1116/2261/57007/51074	4
GO:0043281	regulation of cysteine-type endopeptidase activity involved in apoptotic process	3/115	216/17653	0.166853	0.367691	0.310679	6279/2152/4318	3
GO:0000002	mitochondrial genome maintenance	1/115	28/17653	0.167351	0.367691	0.310679	10891	1
GO:0002675	positive regulation of acute inflammatory response	1/115	28/17653	0.167351	0.367691	0.310679	718	1
GO:0010259	multicellular organism aging	1/115	28/17653	0.167351	0.367691	0.310679	1906	1
GO:0033032	regulation of myeloid cell apoptotic process	1/115	28/17653	0.167351	0.367691	0.310679	301	1
GO:0034368	protein-lipid complex remodeling	1/115	28/17653	0.167351	0.367691	0.310679	9388	1
GO:0034369	plasma lipoprotein particle remodeling	1/115	28/17653	0.167351	0.367691	0.310679	9388	1
GO:0042634	regulation of hair cycle	1/115	28/17653	0.167351	0.367691	0.310679	1001	1
GO:0044550	secondary metabolite biosynthetic process	1/115	28/17653	0.167351	0.367691	0.310679	1001	1
GO:0046636	negative regulation of alpha-beta T cell activation	1/115	28/17653	0.167351	0.367691	0.310679	301	1
GO:0050482	arachidonic acid secretion	1/115	28/17653	0.167351	0.367691	0.310679	301	1
GO:0052312	modulation of transcription in other organism involved in symbiotic interaction	1/115	28/17653	0.167351	0.367691	0.310679	8091	1
GO:0060292	long term synaptic depression	1/115	28/17653	0.167351	0.367691	0.310679	10288	1
GO:0071634	regulation of transforming growth factor beta production	1/115	28/17653	0.167351	0.367691	0.310679	1001	1
GO:1903963	arachidonate transport	1/115	28/17653	0.167351	0.367691	0.310679	301	1
GO:2000108	positive regulation of leukocyte apoptotic process	1/115	28/17653	0.167351	0.367691	0.310679	301	1
GO:0003014	renal system process	2/115	113/17653	0.167843	0.368069	0.310999	23213/1906	2
GO:0007200	phospholipase C-activating G-protein coupled receptor signaling pathway	2/115	113/17653	0.167843	0.368069	0.310999	7052/1906	2
GO:0007043	cell-cell junction assembly	2/115	114/17653	0.170154	0.370758	0.313271	1001/9076	2
GO:0010595	positive regulation of endothelial cell migration	2/115	114/17653	0.170154	0.370758	0.313271	1906/301	2
GO:0046486	glycerolipid metabolic process	5/115	450/17653	0.170487	0.370758	0.313271	2182/79888/2261/80235/718	5
GO:0002700	regulation of production of molecular mediator of immune response	2/115	115/17653	0.172469	0.370758	0.313271	11213/9865	2
GO:0001782	B cell homeostasis	1/115	29/17653	0.172783	0.370758	0.313271	124976	1
GO:0007205	protein kinase C-activating G-protein coupled receptor signaling pathway	1/115	29/17653	0.172783	0.370758	0.313271	1906	1
GO:0010800	positive regulation of peptidyl-threonine phosphorylation	1/115	29/17653	0.172783	0.370758	0.313271	1116	1
GO:0032743	positive regulation of interleukin-2 production	1/115	29/17653	0.172783	0.370758	0.313271	301	1
GO:0032892	positive regulation of organic acid transport	1/115	29/17653	0.172783	0.370758	0.313271	1906	1
GO:0034367	protein-containing complex remodeling	1/115	29/17653	0.172783	0.370758	0.313271	9388	1
GO:0034698	response to gonadotropin	1/115	29/17653	0.172783	0.370758	0.313271	10891	1
GO:0035066	positive regulation of histone acetylation	1/115	29/17653	0.172783	0.370758	0.313271	10891	1
GO:0042168	heme metabolic process	1/115	29/17653	0.172783	0.370758	0.313271	54658	1
GO:0042554	superoxide anion generation	1/115	29/17653	0.172783	0.370758	0.313271	1906	1
GO:0045920	negative regulation of exocytosis	1/115	29/17653	0.172783	0.370758	0.313271	301	1
GO:0046320	regulation of fatty acid oxidation	1/115	29/17653	0.172783	0.370758	0.313271	10891	1
GO:0060441	epithelial tube branching involved in lung morphogenesis	1/115	29/17653	0.172783	0.370758	0.313271	3371	1
GO:0071295	cellular response to vitamin	1/115	29/17653	0.172783	0.370758	0.313271	3371	1
GO:0071604	transforming growth factor beta production	1/115	29/17653	0.172783	0.370758	0.313271	1001	1
GO:0090200	positive regulation of release of cytochrome c from mitochondria	1/115	29/17653	0.172783	0.370758	0.313271	4318	1
GO:1902230	negative regulation of intrinsic apoptotic signaling pathway in response to DNA damage	1/115	29/17653	0.172783	0.370758	0.313271	57007	1
GO:2000272	negative regulation of signaling receptor activity	1/115	29/17653	0.172783	0.370758	0.313271	10891	1
GO:2000516	positive regulation of CD4-positive, alpha-beta T cell activation	1/115	29/17653	0.172783	0.370758	0.313271	301	1
GO:0006639	acylglycerol metabolic process	2/115	116/17653	0.174791	0.37332	0.315436	2182/718	2
GO:0008543	fibroblast growth factor receptor signaling pathway	2/115	116/17653	0.174791	0.37332	0.315436	2261/23213	2
GO:0017156	calcium ion regulated exocytosis	2/115	116/17653	0.174791	0.37332	0.315436	145741/27445	2
GO:0019751	polyol metabolic process	2/115	116/17653	0.174791	0.37332	0.315436	3706/5333	2
GO:0051101	regulation of DNA binding	2/115	116/17653	0.174791	0.37332	0.315436	8091/4318	2
GO:0007159	leukocyte cell-cell adhesion	4/115	335/17653	0.175106	0.373646	0.315712	8651/6279/301/10288	4
GO:0051346	negative regulation of hydrolase activity	5/115	456/17653	0.176979	0.373952	0.31597	5274/5054/301/4318/718	5
GO:0006638	neutral lipid metabolic process	2/115	117/17653	0.177117	0.373952	0.31597	2182/718	2
GO:1905477	positive regulation of protein localization to membrane	2/115	117/17653	0.177117	0.373952	0.31597	2040/5174	2
GO:0002828	regulation of type 2 immune response	1/115	30/17653	0.178181	0.373952	0.31597	301	1
GO:0009065	glutamine family amino acid catabolic process	1/115	30/17653	0.178181	0.373952	0.31597	4843	1
GO:0015721	bile acid and bile salt transport	1/115	30/17653	0.178181	0.373952	0.31597	366	1
GO:0034390	smooth muscle cell apoptotic process	1/115	30/17653	0.178181	0.373952	0.31597	1906	1
GO:0034391	regulation of smooth muscle cell apoptotic process	1/115	30/17653	0.178181	0.373952	0.31597	1906	1
GO:0038111	interleukin-7-mediated signaling pathway	1/115	30/17653	0.178181	0.373952	0.31597	8651	1
GO:0042572	retinol metabolic process	1/115	30/17653	0.178181	0.373952	0.31597	195814	1
GO:0043552	positive regulation of phosphatidylinositol 3-kinase activity	1/115	30/17653	0.178181	0.373952	0.31597	2261	1
GO:0045622	regulation of T-helper cell differentiation	1/115	30/17653	0.178181	0.373952	0.31597	301	1
GO:0045745	positive regulation of G-protein coupled receptor protein signaling pathway	1/115	30/17653	0.178181	0.373952	0.31597	718	1
GO:0048730	epidermis morphogenesis	1/115	30/17653	0.178181	0.373952	0.31597	3488	1
GO:0050716	positive regulation of interleukin-1 secretion	1/115	30/17653	0.178181	0.373952	0.31597	6288	1
GO:0051385	response to mineralocorticoid	1/115	30/17653	0.178181	0.373952	0.31597	1906	1
GO:0097720	calcineurin-mediated signaling	1/115	30/17653	0.178181	0.373952	0.31597	63928	1
GO:2000758	positive regulation of peptidyl-lysine acetylation	1/115	30/17653	0.178181	0.373952	0.31597	10891	1
GO:0051607	defense response to virus	3/115	224/17653	0.179682	0.376413	0.31805	10581/4321/10060	3
GO:1903039	positive regulation of leukocyte cell-cell adhesion	3/115	224/17653	0.179682	0.376413	0.31805	8651/301/10288	3
GO:0030217	T cell differentiation	3/115	225/17653	0.181304	0.376446	0.318077	8651/301/10288	3
GO:0010821	regulation of mitochondrion organization	3/115	226/17653	0.182931	0.376446	0.318077	1513/10891/4318	3
GO:0003298	physiological muscle hypertrophy	1/115	31/17653	0.183544	0.376446	0.318077	1906	1
GO:0003301	physiological cardiac muscle hypertrophy	1/115	31/17653	0.183544	0.376446	0.318077	1906	1
GO:0003401	axis elongation	1/115	31/17653	0.183544	0.376446	0.318077	3371	1
GO:0010837	regulation of keratinocyte proliferation	1/115	31/17653	0.183544	0.376446	0.318077	1001	1
GO:0010922	positive regulation of phosphatase activity	1/115	31/17653	0.183544	0.376446	0.318077	63928	1
GO:0014002	astrocyte development	1/115	31/17653	0.183544	0.376446	0.318077	6279	1
GO:0014741	negative regulation of muscle hypertrophy	1/115	31/17653	0.183544	0.376446	0.318077	3488	1
GO:0030201	heparan sulfate proteoglycan metabolic process	1/115	31/17653	0.183544	0.376446	0.318077	23213	1
GO:0031280	negative regulation of cyclase activity	1/115	31/17653	0.183544	0.376446	0.318077	79849	1
GO:0034142	toll-like receptor 4 signaling pathway	1/115	31/17653	0.183544	0.376446	0.318077	9865	1
GO:0042307	positive regulation of protein import into nucleus	1/115	31/17653	0.183544	0.376446	0.318077	63928	1
GO:0044818	mitotic G2/M transition checkpoint	1/115	31/17653	0.183544	0.376446	0.318077	8091	1
GO:0046627	negative regulation of insulin receptor signaling pathway	1/115	31/17653	0.183544	0.376446	0.318077	8651	1
GO:0061049	cell growth involved in cardiac muscle cell development	1/115	31/17653	0.183544	0.376446	0.318077	1906	1
GO:0098760	response to interleukin-7	1/115	31/17653	0.183544	0.376446	0.318077	8651	1
GO:0098761	cellular response to interleukin-7	1/115	31/17653	0.183544	0.376446	0.318077	8651	1
GO:1901890	positive regulation of cell junction assembly	1/115	31/17653	0.183544	0.376446	0.318077	9076	1
GO:2000352	negative regulation of endothelial cell apoptotic process	1/115	31/17653	0.183544	0.376446	0.318077	5054	1
GO:0008544	epidermis development	5/115	462/17653	0.183565	0.376446	0.318077	1513/1001/3488/54345/301	5
GO:0006805	xenobiotic metabolic process	2/115	120/17653	0.184124	0.376446	0.318077	8824/54658	2
GO:0010675	regulation of cellular carbohydrate metabolic process	2/115	120/17653	0.184124	0.376446	0.318077	3488/10891	2
GO:0048489	synaptic vesicle transport	2/115	120/17653	0.184124	0.376446	0.318077	145741/27445	2
GO:0097480	establishment of synaptic vesicle localization	2/115	120/17653	0.184124	0.376446	0.318077	145741/27445	2
GO:1903825	organic acid transmembrane transport	2/115	120/17653	0.184124	0.376446	0.318077	11254/366	2
GO:1905039	carboxylic acid transmembrane transport	2/115	120/17653	0.184124	0.376446	0.318077	11254/366	2
GO:0043467	regulation of generation of precursor metabolites and energy	2/115	121/17653	0.186469	0.380563	0.321556	10891/4843	2
GO:0051592	response to calcium ion	2/115	121/17653	0.186469	0.380563	0.321556	63928/1906	2
GO:0071560	cellular response to transforming growth factor beta stimulus	3/115	229/17653	0.187834	0.381064	0.321979	9076/10891/1906	3
GO:0000038	very long-chain fatty acid metabolic process	1/115	32/17653	0.188872	0.381064	0.321979	60481	1
GO:0002714	positive regulation of B cell mediated immunity	1/115	32/17653	0.188872	0.381064	0.321979	718	1
GO:0002891	positive regulation of immunoglobulin mediated immune response	1/115	32/17653	0.188872	0.381064	0.321979	718	1
GO:0006506	GPI anchor biosynthetic process	1/115	32/17653	0.188872	0.381064	0.321979	80235	1
GO:0010543	regulation of platelet activation	1/115	32/17653	0.188872	0.381064	0.321979	10630	1
GO:0030803	negative regulation of cyclic nucleotide biosynthetic process	1/115	32/17653	0.188872	0.381064	0.321979	79849	1
GO:0032228	regulation of synaptic transmission, GABAergic	1/115	32/17653	0.188872	0.381064	0.321979	766	1
GO:0033028	myeloid cell apoptotic process	1/115	32/17653	0.188872	0.381064	0.321979	301	1
GO:0043403	skeletal muscle tissue regeneration	1/115	32/17653	0.188872	0.381064	0.321979	301	1
GO:0071354	cellular response to interleukin-6	1/115	32/17653	0.188872	0.381064	0.321979	10891	1
GO:1903580	positive regulation of ATP metabolic process	1/115	32/17653	0.188872	0.381064	0.321979	10891	1
GO:1904037	positive regulation of epithelial cell apoptotic process	1/115	32/17653	0.188872	0.381064	0.321979	10891	1
GO:0001666	response to hypoxia	4/115	346/17653	0.18937	0.381733	0.322544	10891/4843/5328/1906	4
GO:1903829	positive regulation of cellular protein localization	4/115	347/17653	0.190685	0.384047	0.324499	1513/63928/2040/5174	4
GO:0062014	negative regulation of small molecule metabolic process	2/115	123/17653	0.191172	0.384689	0.325042	79849/10891	2
GO:0042180	cellular ketone metabolic process	3/115	232/17653	0.192771	0.385311	0.325568	10891/60481/301	3
GO:0045995	regulation of embryonic development	2/115	124/17653	0.193529	0.385311	0.325568	284217/23213	2
GO:0001569	branching involved in blood vessel morphogenesis	1/115	33/17653	0.194166	0.385311	0.325568	1906	1
GO:0002701	negative regulation of production of molecular mediator of immune response	1/115	33/17653	0.194166	0.385311	0.325568	11213	1
GO:0010907	positive regulation of glucose metabolic process	1/115	33/17653	0.194166	0.385311	0.325568	10891	1
GO:0030513	positive regulation of BMP signaling pathway	1/115	33/17653	0.194166	0.385311	0.325568	23213	1
GO:0032350	regulation of hormone metabolic process	1/115	33/17653	0.194166	0.385311	0.325568	10891	1
GO:0046471	phosphatidylglycerol metabolic process	1/115	33/17653	0.194166	0.385311	0.325568	79888	1
GO:0051350	negative regulation of lyase activity	1/115	33/17653	0.194166	0.385311	0.325568	79849	1
GO:0060674	placenta blood vessel development	1/115	33/17653	0.194166	0.385311	0.325568	5333	1
GO:0071312	cellular response to alkaloid	1/115	33/17653	0.194166	0.385311	0.325568	10891	1
GO:0090050	positive regulation of cell migration involved in sprouting angiogenesis	1/115	33/17653	0.194166	0.385311	0.325568	301	1
GO:0090218	positive regulation of lipid kinase activity	1/115	33/17653	0.194166	0.385311	0.325568	2261	1
GO:0098801	regulation of renal system process	1/115	33/17653	0.194166	0.385311	0.325568	1906	1
GO:1900271	regulation of long-term synaptic potentiation	1/115	33/17653	0.194166	0.385311	0.325568	10288	1
GO:1903053	regulation of extracellular matrix organization	1/115	33/17653	0.194166	0.385311	0.325568	10630	1
GO:0071559	response to transforming growth factor beta	3/115	233/17653	0.194425	0.385491	0.32572	9076/10891/1906	3
GO:0001704	formation of primary germ layer	2/115	125/17653	0.19589	0.387378	0.327314	8091/4318	2
GO:0009755	hormone-mediated signaling pathway	3/115	234/17653	0.196081	0.387378	0.327314	6751/11240/10891	3
GO:0006664	glycolipid metabolic process	2/115	126/17653	0.198255	0.387378	0.327314	80235/5476	2
GO:1903509	liposaccharide metabolic process	2/115	126/17653	0.198255	0.387378	0.327314	80235/5476	2
GO:0002385	mucosal immune response	1/115	34/17653	0.199425	0.387378	0.327314	4843	1
GO:0003156	regulation of animal organ formation	1/115	34/17653	0.199425	0.387378	0.327314	23213	1
GO:0006111	regulation of gluconeogenesis	1/115	34/17653	0.199425	0.387378	0.327314	10891	1
GO:0006505	GPI anchor metabolic process	1/115	34/17653	0.199425	0.387378	0.327314	80235	1
GO:0007435	salivary gland morphogenesis	1/115	34/17653	0.199425	0.387378	0.327314	7052	1
GO:0030261	chromosome condensation	1/115	34/17653	0.199425	0.387378	0.327314	8091	1
GO:0045070	positive regulation of viral genome replication	1/115	34/17653	0.199425	0.387378	0.327314	2040	1
GO:0045987	positive regulation of smooth muscle contraction	1/115	34/17653	0.199425	0.387378	0.327314	1906	1
GO:0048246	macrophage chemotaxis	1/115	34/17653	0.199425	0.387378	0.327314	6288	1
GO:0050775	positive regulation of dendrite morphogenesis	1/115	34/17653	0.199425	0.387378	0.327314	3706	1
GO:0051930	regulation of sensory perception of pain	1/115	34/17653	0.199425	0.387378	0.327314	1906	1
GO:0051931	regulation of sensory perception	1/115	34/17653	0.199425	0.387378	0.327314	1906	1
GO:0072604	interleukin-6 secretion	1/115	34/17653	0.199425	0.387378	0.327314	4843	1
GO:0090207	regulation of triglyceride metabolic process	1/115	34/17653	0.199425	0.387378	0.327314	718	1
GO:0097421	liver regeneration	1/115	34/17653	0.199425	0.387378	0.327314	9076	1
GO:0097502	mannosylation	1/115	34/17653	0.199425	0.387378	0.327314	80235	1
GO:1900015	regulation of cytokine production involved in inflammatory response	1/115	34/17653	0.199425	0.387378	0.327314	4843	1
GO:1900026	positive regulation of substrate adhesion-dependent cell spreading	1/115	34/17653	0.199425	0.387378	0.327314	10562	1
GO:1900077	negative regulation of cellular response to insulin stimulus	1/115	34/17653	0.199425	0.387378	0.327314	8651	1
GO:1904591	positive regulation of protein import	1/115	34/17653	0.199425	0.387378	0.327314	63928	1
GO:0036293	response to decreased oxygen levels	4/115	354/17653	0.199973	0.388113	0.327935	10891/4843/5328/1906	4
GO:0048872	homeostasis of number of cells	3/115	238/17653	0.202743	0.392826	0.331918	6584/124976/301	3
GO:0050714	positive regulation of protein secretion	3/115	238/17653	0.202743	0.392826	0.331918	6288/4321/2219	3
GO:0050678	regulation of epithelial cell proliferation	4/115	357/17653	0.203995	0.393203	0.332236	1001/4321/23213/2152	4
GO:0070374	positive regulation of ERK1 and ERK2 cascade	3/115	239/17653	0.204417	0.393203	0.332236	1116/2261/57007	3
GO:0006656	phosphatidylcholine biosynthetic process	1/115	35/17653	0.204651	0.393203	0.332236	79888	1
GO:0006699	bile acid biosynthetic process	1/115	35/17653	0.204651	0.393203	0.332236	23600	1
GO:0040036	regulation of fibroblast growth factor receptor signaling pathway	1/115	35/17653	0.204651	0.393203	0.332236	23213	1
GO:0044331	cell-cell adhesion mediated by cadherin	1/115	35/17653	0.204651	0.393203	0.332236	1001	1
GO:0048333	mesodermal cell differentiation	1/115	35/17653	0.204651	0.393203	0.332236	8091	1
GO:0048566	embryonic digestive tract development	1/115	35/17653	0.204651	0.393203	0.332236	3576	1
GO:1904707	positive regulation of vascular smooth muscle cell proliferation	1/115	35/17653	0.204651	0.393203	0.332236	4318	1
GO:2000648	positive regulation of stem cell proliferation	1/115	35/17653	0.204651	0.393203	0.332236	8091	1
GO:0043280	positive regulation of cysteine-type endopeptidase activity involved in apoptotic process	2/115	129/17653	0.205371	0.394257	0.333127	6279/2152	2
GO:0019359	nicotinamide nucleotide biosynthetic process	2/115	130/17653	0.207749	0.39618	0.334751	10891/4199	2
GO:0019363	pyridine nucleotide biosynthetic process	2/115	130/17653	0.207749	0.39618	0.334751	10891/4199	2
GO:0030968	endoplasmic reticulum unfolded protein response	2/115	130/17653	0.207749	0.39618	0.334751	3576/11015	2
GO:1903532	positive regulation of secretion by cell	4/115	361/17653	0.209396	0.39618	0.334751	6288/4321/2219/1906	4
GO:0090257	regulation of muscle system process	3/115	242/17653	0.209459	0.39618	0.334751	3488/10891/1906	3
GO:0002251	organ or tissue specific immune response	1/115	36/17653	0.209842	0.39618	0.334751	4843	1
GO:0002755	MyD88-dependent toll-like receptor signaling pathway	1/115	36/17653	0.209842	0.39618	0.334751	11213	1
GO:0002931	response to ischemia	1/115	36/17653	0.209842	0.39618	0.334751	10891	1
GO:0006778	porphyrin-containing compound metabolic process	1/115	36/17653	0.209842	0.39618	0.334751	54658	1
GO:0019432	triglyceride biosynthetic process	1/115	36/17653	0.209842	0.39618	0.334751	718	1
GO:0030800	negative regulation of cyclic nucleotide metabolic process	1/115	36/17653	0.209842	0.39618	0.334751	79849	1
GO:0033280	response to vitamin D	1/115	36/17653	0.209842	0.39618	0.334751	3371	1
GO:0034122	negative regulation of toll-like receptor signaling pathway	1/115	36/17653	0.209842	0.39618	0.334751	11213	1
GO:0035418	protein localization to synapse	1/115	36/17653	0.209842	0.39618	0.334751	27445	1
GO:0050850	positive regulation of calcium-mediated signaling	1/115	36/17653	0.209842	0.39618	0.334751	63928	1
GO:0060416	response to growth hormone	1/115	36/17653	0.209842	0.39618	0.334751	3488	1
GO:0035296	regulation of tube diameter	2/115	131/17653	0.21013	0.39618	0.334751	4843/1906	2
GO:0097746	regulation of blood vessel diameter	2/115	131/17653	0.21013	0.39618	0.334751	4843/1906	2
GO:0046474	glycerophospholipid biosynthetic process	3/115	243/17653	0.211145	0.39618	0.334751	79888/2261/80235	3
GO:0050867	positive regulation of cell activation	4/115	363/17653	0.212113	0.39618	0.334751	10630/8651/301/10288	4
GO:0050671	positive regulation of lymphocyte proliferation	2/115	132/17653	0.212514	0.39618	0.334751	301/10288	2
GO:0051250	negative regulation of lymphocyte activation	2/115	132/17653	0.212514	0.39618	0.334751	301/10288	2
GO:0072329	monocarboxylic acid catabolic process	2/115	132/17653	0.212514	0.39618	0.334751	38/23600	2
GO:0001818	negative regulation of cytokine production	3/115	245/17653	0.214528	0.39618	0.334751	1001/11213/301	3
GO:0032946	positive regulation of mononuclear cell proliferation	2/115	133/17653	0.214901	0.39618	0.334751	301/10288	2
GO:0072525	pyridine-containing compound biosynthetic process	2/115	133/17653	0.214901	0.39618	0.334751	10891/4199	2
GO:0001912	positive regulation of leukocyte mediated cytotoxicity	1/115	37/17653	0.215	0.39618	0.334751	4843	1
GO:0001953	negative regulation of cell-matrix adhesion	1/115	37/17653	0.215	0.39618	0.334751	5054	1
GO:0002534	cytokine production involved in inflammatory response	1/115	37/17653	0.215	0.39618	0.334751	4843	1
GO:0006739	NADP metabolic process	1/115	37/17653	0.215	0.39618	0.334751	4199	1
GO:0008207	C21-steroid hormone metabolic process	1/115	37/17653	0.215	0.39618	0.334751	10891	1
GO:0009395	phospholipid catabolic process	1/115	37/17653	0.215	0.39618	0.334751	9388	1
GO:0010677	negative regulation of cellular carbohydrate metabolic process	1/115	37/17653	0.215	0.39618	0.334751	10891	1
GO:0016572	histone phosphorylation	1/115	37/17653	0.215	0.39618	0.334751	8091	1
GO:0032715	negative regulation of interleukin-6 production	1/115	37/17653	0.215	0.39618	0.334751	11213	1
GO:0042092	type 2 immune response	1/115	37/17653	0.215	0.39618	0.334751	301	1
GO:0043094	cellular metabolic compound salvage	1/115	37/17653	0.215	0.39618	0.334751	51074	1
GO:0043252	sodium-independent organic anion transport	1/115	37/17653	0.215	0.39618	0.334751	6584	1
GO:0043370	regulation of CD4-positive, alpha-beta T cell differentiation	1/115	37/17653	0.215	0.39618	0.334751	301	1
GO:0045581	negative regulation of T cell differentiation	1/115	37/17653	0.215	0.39618	0.334751	301	1
GO:0045742	positive regulation of epidermal growth factor receptor signaling pathway	1/115	37/17653	0.215	0.39618	0.334751	4318	1
GO:0045823	positive regulation of heart contraction	1/115	37/17653	0.215	0.39618	0.334751	1906	1
GO:0048286	lung alveolus development	1/115	37/17653	0.215	0.39618	0.334751	3488	1
GO:0061001	regulation of dendritic spine morphogenesis	1/115	37/17653	0.215	0.39618	0.334751	3706	1
GO:0071276	cellular response to cadmium ion	1/115	37/17653	0.215	0.39618	0.334751	4318	1
GO:0071867	response to monoamine	1/115	37/17653	0.215	0.39618	0.334751	10891	1
GO:0071869	response to catecholamine	1/115	37/17653	0.215	0.39618	0.334751	10891	1
GO:1900087	positive regulation of G1/S transition of mitotic cell cycle	1/115	37/17653	0.215	0.39618	0.334751	301	1
GO:1902229	regulation of intrinsic apoptotic signaling pathway in response to DNA damage	1/115	37/17653	0.215	0.39618	0.334751	57007	1
GO:2001038	regulation of cellular response to drug	1/115	37/17653	0.215	0.39618	0.334751	8091	1
GO:0042737	drug catabolic process	2/115	134/17653	0.217291	0.399215	0.337316	1116/38	2
GO:0051053	negative regulation of DNA metabolic process	2/115	134/17653	0.217291	0.399215	0.337316	8091/6282	2
GO:0006090	pyruvate metabolic process	2/115	135/17653	0.219682	0.399215	0.337316	10891/4199	2
GO:0000096	sulfur amino acid metabolic process	1/115	38/17653	0.220125	0.399215	0.337316	51074	1
GO:0002686	negative regulation of leukocyte migration	1/115	38/17653	0.220125	0.399215	0.337316	11240	1
GO:0006882	cellular zinc ion homeostasis	1/115	38/17653	0.220125	0.399215	0.337316	6279	1
GO:0007431	salivary gland development	1/115	38/17653	0.220125	0.399215	0.337316	7052	1
GO:0031057	negative regulation of histone modification	1/115	38/17653	0.220125	0.399215	0.337316	195814	1
GO:0035307	positive regulation of protein dephosphorylation	1/115	38/17653	0.220125	0.399215	0.337316	10288	1
GO:0042769	DNA damage response, detection of DNA damage	1/115	38/17653	0.220125	0.399215	0.337316	8091	1
GO:0046460	neutral lipid biosynthetic process	1/115	38/17653	0.220125	0.399215	0.337316	718	1
GO:0046463	acylglycerol biosynthetic process	1/115	38/17653	0.220125	0.399215	0.337316	718	1
GO:0048791	calcium ion-regulated exocytosis of neurotransmitter	1/115	38/17653	0.220125	0.399215	0.337316	145741	1
GO:0050691	regulation of defense response to virus by host	1/115	38/17653	0.220125	0.399215	0.337316	4321	1
GO:0050873	brown fat cell differentiation	1/115	38/17653	0.220125	0.399215	0.337316	10891	1
GO:0071675	regulation of mononuclear cell migration	1/115	38/17653	0.220125	0.399215	0.337316	5054	1
GO:0090311	regulation of protein deacetylation	1/115	38/17653	0.220125	0.399215	0.337316	195814	1
GO:1901985	positive regulation of protein acetylation	1/115	38/17653	0.220125	0.399215	0.337316	10891	1
GO:1902042	negative regulation of extrinsic apoptotic signaling pathway via death domain receptors	1/115	38/17653	0.220125	0.399215	0.337316	5054	1
GO:1905209	positive regulation of cardiocyte differentiation	1/115	38/17653	0.220125	0.399215	0.337316	1906	1
GO:0043542	endothelial cell migration	3/115	249/17653	0.221328	0.400764	0.338625	54345/1906/301	3
GO:2000116	regulation of cysteine-type endopeptidase activity	3/115	249/17653	0.221328	0.400764	0.338625	6279/2152/4318	3
GO:0001837	epithelial to mesenchymal transition	2/115	136/17653	0.222077	0.401486	0.339235	10630/8091	2
GO:0031056	regulation of histone modification	2/115	136/17653	0.222077	0.401486	0.339235	10891/195814	2
GO:0072006	nephron development	2/115	137/17653	0.224473	0.403351	0.340811	38/23213	2
GO:0000266	mitochondrial fission	1/115	39/17653	0.225216	0.403351	0.340811	10891	1
GO:0001990	regulation of systemic arterial blood pressure by hormone	1/115	39/17653	0.225216	0.403351	0.340811	1906	1
GO:0008156	negative regulation of DNA replication	1/115	39/17653	0.225216	0.403351	0.340811	6282	1
GO:0030225	macrophage differentiation	1/115	39/17653	0.225216	0.403351	0.340811	4318	1
GO:0031572	G2 DNA damage checkpoint	1/115	39/17653	0.225216	0.403351	0.340811	8091	1
GO:0042088	T-helper 1 type immune response	1/115	39/17653	0.225216	0.403351	0.340811	301	1
GO:0043029	T cell homeostasis	1/115	39/17653	0.225216	0.403351	0.340811	124976	1
GO:0043954	cellular component maintenance	1/115	39/17653	0.225216	0.403351	0.340811	3706	1
GO:0045616	regulation of keratinocyte differentiation	1/115	39/17653	0.225216	0.403351	0.340811	1513	1
GO:0046638	positive regulation of alpha-beta T cell differentiation	1/115	39/17653	0.225216	0.403351	0.340811	301	1
GO:1901186	positive regulation of ERBB signaling pathway	1/115	39/17653	0.225216	0.403351	0.340811	4318	1
GO:0030518	intracellular steroid hormone receptor signaling pathway	2/115	138/17653	0.226871	0.405999	0.343048	11240/10891	2
GO:0016999	antibiotic metabolic process	2/115	139/17653	0.229271	0.406388	0.343377	54658/4314	2
GO:0050880	regulation of blood vessel size	2/115	139/17653	0.229271	0.406388	0.343377	4843/1906	2
GO:0099003	vesicle-mediated transport in synapse	2/115	139/17653	0.229271	0.406388	0.343377	145741/27445	2
GO:0001659	temperature homeostasis	1/115	40/17653	0.230275	0.406388	0.343377	10891	1
GO:0006040	amino sugar metabolic process	1/115	40/17653	0.230275	0.406388	0.343377	1116	1
GO:0010613	positive regulation of cardiac muscle hypertrophy	1/115	40/17653	0.230275	0.406388	0.343377	1906	1
GO:0014742	positive regulation of muscle hypertrophy	1/115	40/17653	0.230275	0.406388	0.343377	1906	1
GO:0033865	nucleoside bisphosphate metabolic process	1/115	40/17653	0.230275	0.406388	0.343377	38	1
GO:0033875	ribonucleoside bisphosphate metabolic process	1/115	40/17653	0.230275	0.406388	0.343377	38	1
GO:0034032	purine nucleoside bisphosphate metabolic process	1/115	40/17653	0.230275	0.406388	0.343377	38	1
GO:0042181	ketone biosynthetic process	1/115	40/17653	0.230275	0.406388	0.343377	10891	1
GO:0044058	regulation of digestive system process	1/115	40/17653	0.230275	0.406388	0.343377	6584	1
GO:0045912	negative regulation of carbohydrate metabolic process	1/115	40/17653	0.230275	0.406388	0.343377	10891	1
GO:0046189	phenol-containing compound biosynthetic process	1/115	40/17653	0.230275	0.406388	0.343377	1001	1
GO:0050832	defense response to fungus	1/115	40/17653	0.230275	0.406388	0.343377	6279	1
GO:0055069	zinc ion homeostasis	1/115	40/17653	0.230275	0.406388	0.343377	6279	1
GO:0097028	dendritic cell differentiation	1/115	40/17653	0.230275	0.406388	0.343377	10288	1
GO:1905517	macrophage migration	1/115	40/17653	0.230275	0.406388	0.343377	6288	1
GO:0035150	regulation of tube size	2/115	140/17653	0.231673	0.407916	0.344668	4843/1906	2
GO:0042133	neurotransmitter metabolic process	2/115	140/17653	0.231673	0.407916	0.344668	4843/1906	2
GO:0070665	positive regulation of leukocyte proliferation	2/115	140/17653	0.231673	0.407916	0.344668	301/10288	2
GO:0070482	response to oxygen levels	4/115	378/17653	0.23279	0.409569	0.346064	10891/4843/5328/1906	4
GO:0021700	developmental maturation	3/115	256/17653	0.233332	0.409579	0.346073	1001/2261/54345	3
GO:0072593	reactive oxygen species metabolic process	3/115	256/17653	0.233332	0.409579	0.346073	4843/1906/4314	3
GO:1902105	regulation of leukocyte differentiation	3/115	256/17653	0.233332	0.409579	0.346073	8651/301/10288	3
GO:0001906	cell killing	2/115	141/17653	0.234077	0.40959	0.346083	4843/4069	2
GO:0051092	positive regulation of NF-kappaB transcription factor activity	2/115	141/17653	0.234077	0.40959	0.346083	11213/6279	2
GO:0071236	cellular response to antibiotic	2/115	141/17653	0.234077	0.40959	0.346083	54658/301	2
GO:1902652	secondary alcohol metabolic process	2/115	141/17653	0.234077	0.40959	0.346083	38/3158	2
GO:0060485	mesenchyme development	3/115	257/17653	0.235056	0.40959	0.346083	10630/8091/1906	3
GO:0006654	phosphatidic acid biosynthetic process	1/115	41/17653	0.2353	0.40959	0.346083	79888	1
GO:0010799	regulation of peptidyl-threonine phosphorylation	1/115	41/17653	0.2353	0.40959	0.346083	1116	1
GO:0048488	synaptic vesicle endocytosis	1/115	41/17653	0.2353	0.40959	0.346083	145741	1
GO:0060999	positive regulation of dendritic spine development	1/115	41/17653	0.2353	0.40959	0.346083	3706	1
GO:0072595	maintenance of protein localization in organelle	1/115	41/17653	0.2353	0.40959	0.346083	11015	1
GO:1904036	negative regulation of epithelial cell apoptotic process	1/115	41/17653	0.2353	0.40959	0.346083	5054	1
GO:0010770	positive regulation of cell morphogenesis involved in differentiation	2/115	142/17653	0.236482	0.411336	0.347558	3706/10562	2
GO:0006606	protein import into nucleus	2/115	143/17653	0.238889	0.414823	0.350504	63928/4321	2
GO:2001233	regulation of apoptotic signaling pathway	4/115	383/17653	0.239794	0.414823	0.350504	5054/6279/57007/4318	4
GO:0010107	potassium ion import	1/115	42/17653	0.240294	0.414823	0.350504	10060	1
GO:0033574	response to testosterone	1/115	42/17653	0.240294	0.414823	0.350504	1906	1
GO:0045429	positive regulation of nitric oxide biosynthetic process	1/115	42/17653	0.240294	0.414823	0.350504	1906	1
GO:0046473	phosphatidic acid metabolic process	1/115	42/17653	0.240294	0.414823	0.350504	79888	1
GO:0051602	response to electrical stimulus	1/115	42/17653	0.240294	0.414823	0.350504	10891	1
GO:1900449	regulation of glutamate receptor signaling pathway	1/115	42/17653	0.240294	0.414823	0.350504	10891	1
GO:1903793	positive regulation of anion transport	1/115	42/17653	0.240294	0.414823	0.350504	1906	1
GO:1904407	positive regulation of nitric oxide metabolic process	1/115	42/17653	0.240294	0.414823	0.350504	1906	1
GO:0043271	negative regulation of ion transport	2/115	144/17653	0.241297	0.41593	0.351439	10288/4318	2
GO:2001056	positive regulation of cysteine-type endopeptidase activity	2/115	144/17653	0.241297	0.41593	0.351439	6279/2152	2
GO:0046883	regulation of hormone secretion	3/115	261/17653	0.241978	0.416791	0.352167	4843/1906/301	3
GO:0006661	phosphatidylinositol biosynthetic process	2/115	145/17653	0.243706	0.417114	0.35244	2261/80235	2
GO:0007269	neurotransmitter secretion	2/115	145/17653	0.243706	0.417114	0.35244	145741/27445	2
GO:0030902	hindbrain development	2/115	145/17653	0.243706	0.417114	0.35244	6751/10891	2
GO:0046467	membrane lipid biosynthetic process	2/115	145/17653	0.243706	0.417114	0.35244	60481/80235	2
GO:0099643	signal release from synapse	2/115	145/17653	0.243706	0.417114	0.35244	145741/27445	2
GO:0044262	cellular carbohydrate metabolic process	3/115	262/17653	0.243714	0.417114	0.35244	3706/3488/10891	3
GO:0002437	inflammatory response to antigenic stimulus	1/115	43/17653	0.245255	0.417114	0.35244	718	1
GO:0006284	base-excision repair	1/115	43/17653	0.245255	0.417114	0.35244	8091	1
GO:0010883	regulation of lipid storage	1/115	43/17653	0.245255	0.417114	0.35244	718	1
GO:0019835	cytolysis	1/115	43/17653	0.245255	0.417114	0.35244	4069	1
GO:0021762	substantia nigra development	1/115	43/17653	0.245255	0.417114	0.35244	11240	1
GO:0032732	positive regulation of interleukin-1 production	1/115	43/17653	0.245255	0.417114	0.35244	6288	1
GO:0045668	negative regulation of osteoblast differentiation	1/115	43/17653	0.245255	0.417114	0.35244	3488	1
GO:0098693	regulation of synaptic vesicle cycle	1/115	43/17653	0.245255	0.417114	0.35244	27253	1
GO:1901224	positive regulation of NIK/NF-kappaB signaling	1/115	43/17653	0.245255	0.417114	0.35244	1116	1
GO:1903727	positive regulation of phospholipid metabolic process	1/115	43/17653	0.245255	0.417114	0.35244	2261	1
GO:2000725	regulation of cardiac muscle cell differentiation	1/115	43/17653	0.245255	0.417114	0.35244	1906	1
GO:0050806	positive regulation of synaptic transmission	2/115	146/17653	0.246117	0.418271	0.353417	766/10288	2
GO:0022407	regulation of cell-cell adhesion	4/115	388/17653	0.246847	0.419202	0.354203	10630/8651/301/10288	4
GO:0008643	carbohydrate transport	2/115	147/17653	0.248528	0.421122	0.355826	366/718	2
GO:0016573	histone acetylation	2/115	147/17653	0.248528	0.421122	0.355826	10891/195814	2
GO:0035725	sodium ion transmembrane transport	2/115	147/17653	0.248528	0.421122	0.355826	6549/2040	2
GO:0006984	ER-nucleus signaling pathway	1/115	44/17653	0.250183	0.422679	0.357142	3576	1
GO:0031018	endocrine pancreas development	1/115	44/17653	0.250183	0.422679	0.357142	301	1
GO:0045776	negative regulation of blood pressure	1/115	44/17653	0.250183	0.422679	0.357142	4843	1
GO:0050704	regulation of interleukin-1 secretion	1/115	44/17653	0.250183	0.422679	0.357142	6288	1
GO:0045931	positive regulation of mitotic cell cycle	2/115	148/17653	0.25094	0.423646	0.357958	1906/301	2
GO:0034620	cellular response to unfolded protein	2/115	149/17653	0.253353	0.424702	0.358851	3576/11015	2
GO:0042129	regulation of T cell proliferation	2/115	149/17653	0.253353	0.424702	0.358851	301/10288	2
GO:0071695	anatomical structure maturation	2/115	149/17653	0.253353	0.424702	0.358851	1001/2261	2
GO:0048863	stem cell differentiation	3/115	268/17653	0.254172	0.424702	0.358851	8091/54345/1906	3
GO:0002886	regulation of myeloid leukocyte mediated immunity	1/115	45/17653	0.25508	0.424702	0.358851	718	1
GO:0031103	axon regeneration	1/115	45/17653	0.25508	0.424702	0.358851	3371	1
GO:0032011	ARF protein signal transduction	1/115	45/17653	0.25508	0.424702	0.358851	26286	1
GO:0032012	regulation of ARF protein signal transduction	1/115	45/17653	0.25508	0.424702	0.358851	26286	1
GO:0042743	hydrogen peroxide metabolic process	1/115	45/17653	0.25508	0.424702	0.358851	4314	1
GO:0043551	regulation of phosphatidylinositol 3-kinase activity	1/115	45/17653	0.25508	0.424702	0.358851	2261	1
GO:0044764	multi-organism cellular process	1/115	45/17653	0.25508	0.424702	0.358851	6584	1
GO:0048066	developmental pigmentation	1/115	45/17653	0.25508	0.424702	0.358851	124976	1
GO:0055023	positive regulation of cardiac muscle tissue growth	1/115	45/17653	0.25508	0.424702	0.358851	1906	1
GO:0071827	plasma lipoprotein particle organization	1/115	45/17653	0.25508	0.424702	0.358851	9388	1
GO:0090199	regulation of release of cytochrome c from mitochondria	1/115	45/17653	0.25508	0.424702	0.358851	4318	1
GO:0097366	response to bronchodilator	1/115	45/17653	0.25508	0.424702	0.358851	4314	1
GO:1903115	regulation of actin filament-based movement	1/115	45/17653	0.25508	0.424702	0.358851	10630	1
GO:2000514	regulation of CD4-positive, alpha-beta T cell activation	1/115	45/17653	0.25508	0.424702	0.358851	301	1
GO:2000772	regulation of cellular senescence	1/115	45/17653	0.25508	0.424702	0.358851	8091	1
GO:0035051	cardiocyte differentiation	2/115	150/17653	0.255766	0.425536	0.359555	54345/1906	2
GO:0001558	regulation of cell growth	4/115	397/17653	0.259657	0.42876	0.36228	3490/3488/6279/1906	4
GO:0001974	blood vessel remodeling	1/115	46/17653	0.259945	0.42876	0.36228	7052	1
GO:0007129	synapsis	1/115	46/17653	0.259945	0.42876	0.36228	56159	1
GO:0008206	bile acid metabolic process	1/115	46/17653	0.259945	0.42876	0.36228	23600	1
GO:0031343	positive regulation of cell killing	1/115	46/17653	0.259945	0.42876	0.36228	4843	1
GO:0043330	response to exogenous dsRNA	1/115	46/17653	0.259945	0.42876	0.36228	11213	1
GO:0045620	negative regulation of lymphocyte differentiation	1/115	46/17653	0.259945	0.42876	0.36228	301	1
GO:0045744	negative regulation of G-protein coupled receptor protein signaling pathway	1/115	46/17653	0.259945	0.42876	0.36228	3576	1
GO:0051932	synaptic transmission, GABAergic	1/115	46/17653	0.259945	0.42876	0.36228	766	1
GO:0060443	mammary gland morphogenesis	1/115	46/17653	0.259945	0.42876	0.36228	3488	1
GO:1902743	regulation of lamellipodium organization	1/115	46/17653	0.259945	0.42876	0.36228	10630	1
GO:1902808	positive regulation of cell cycle G1/S phase transition	1/115	46/17653	0.259945	0.42876	0.36228	301	1
GO:0018393	internal peptidyl-lysine acetylation	2/115	152/17653	0.260594	0.429214	0.362664	10891/195814	2
GO:0030856	regulation of epithelial cell differentiation	2/115	152/17653	0.260594	0.429214	0.362664	1513/5054	2
GO:0005996	monosaccharide metabolic process	3/115	273/17653	0.262937	0.430852	0.364048	3488/10891/54658	3
GO:0007416	synapse assembly	2/115	153/17653	0.263009	0.430852	0.364048	27253/27445	2
GO:0016125	sterol metabolic process	2/115	153/17653	0.263009	0.430852	0.364048	38/3158	2
GO:0048754	branching morphogenesis of an epithelial tube	2/115	153/17653	0.263009	0.430852	0.364048	3371/1906	2
GO:0007140	male meiotic nuclear division	1/115	47/17653	0.264779	0.430852	0.364048	56159	1
GO:0009409	response to cold	1/115	47/17653	0.264779	0.430852	0.364048	10891	1
GO:0016339	calcium-dependent cell-cell adhesion via plasma membrane cell adhesion molecules	1/115	47/17653	0.264779	0.430852	0.364048	1001	1
GO:0032720	negative regulation of tumor necrosis factor production	1/115	47/17653	0.264779	0.430852	0.364048	11213	1
GO:0035094	response to nicotine	1/115	47/17653	0.264779	0.430852	0.364048	1906	1
GO:0035722	interleukin-12-mediated signaling pathway	1/115	47/17653	0.264779	0.430852	0.364048	759	1
GO:0050732	negative regulation of peptidyl-tyrosine phosphorylation	1/115	47/17653	0.264779	0.430852	0.364048	8651	1
GO:0060338	regulation of type I interferon-mediated signaling pathway	1/115	47/17653	0.264779	0.430852	0.364048	4321	1
GO:0071349	cellular response to interleukin-12	1/115	47/17653	0.264779	0.430852	0.364048	759	1
GO:0071825	protein-lipid complex subunit organization	1/115	47/17653	0.264779	0.430852	0.364048	9388	1
GO:0099601	regulation of neurotransmitter receptor activity	1/115	47/17653	0.264779	0.430852	0.364048	10891	1
GO:1903146	regulation of autophagy of mitochondrion	1/115	47/17653	0.264779	0.430852	0.364048	1513	1
GO:1905268	negative regulation of chromatin organization	1/115	47/17653	0.264779	0.430852	0.364048	195814	1
GO:0002695	negative regulation of leukocyte activation	2/115	154/17653	0.265424	0.43129	0.364418	301/10288	2
GO:0046425	regulation of JAK-STAT cascade	2/115	154/17653	0.265424	0.43129	0.364418	2261/8651	2
GO:0010769	regulation of cell morphogenesis involved in differentiation	3/115	275/17653	0.266454	0.432658	0.365574	10630/3706/10562	3
GO:0007528	neuromuscular junction development	1/115	48/17653	0.269581	0.434357	0.367009	3371	1
GO:0010718	positive regulation of epithelial to mesenchymal transition	1/115	48/17653	0.269581	0.434357	0.367009	10630	1
GO:0010828	positive regulation of glucose transmembrane transport	1/115	48/17653	0.269581	0.434357	0.367009	718	1
GO:0017001	antibiotic catabolic process	1/115	48/17653	0.269581	0.434357	0.367009	54658	1
GO:0045214	sarcomere organization	1/115	48/17653	0.269581	0.434357	0.367009	1906	1
GO:0046164	alcohol catabolic process	1/115	48/17653	0.269581	0.434357	0.367009	79644	1
GO:0048260	positive regulation of receptor-mediated endocytosis	1/115	48/17653	0.269581	0.434357	0.367009	5054	1
GO:0051452	intracellular pH reduction	1/115	48/17653	0.269581	0.434357	0.367009	766	1
GO:0060711	labyrinthine layer development	1/115	48/17653	0.269581	0.434357	0.367009	5333	1
GO:0098586	cellular response to virus	1/115	48/17653	0.269581	0.434357	0.367009	4321	1
GO:2000677	regulation of transcription regulatory region DNA binding	1/115	48/17653	0.269581	0.434357	0.367009	8091	1
GO:0090068	positive regulation of cell cycle process	3/115	277/17653	0.269977	0.434526	0.367151	8091/1906/301	3
GO:0099531	presynaptic process involved in chemical synaptic transmission	2/115	156/17653	0.270254	0.434526	0.367151	145741/27445	2
GO:1904892	regulation of STAT cascade	2/115	156/17653	0.270254	0.434526	0.367151	2261/8651	2
GO:0003044	regulation of systemic arterial blood pressure mediated by a chemical signal	1/115	49/17653	0.274353	0.438353	0.370386	1906	1
GO:0010518	positive regulation of phospholipase activity	1/115	49/17653	0.274353	0.438353	0.370386	2261	1
GO:0045851	pH reduction	1/115	49/17653	0.274353	0.438353	0.370386	766	1
GO:0051055	negative regulation of lipid biosynthetic process	1/115	49/17653	0.274353	0.438353	0.370386	79888	1
GO:0060421	positive regulation of heart growth	1/115	49/17653	0.274353	0.438353	0.370386	1906	1
GO:0070671	response to interleukin-12	1/115	49/17653	0.274353	0.438353	0.370386	759	1
GO:1903556	negative regulation of tumor necrosis factor superfamily cytokine production	1/115	49/17653	0.274353	0.438353	0.370386	11213	1
GO:2000401	regulation of lymphocyte migration	1/115	49/17653	0.274353	0.438353	0.370386	11240	1
GO:2000649	regulation of sodium ion transmembrane transporter activity	1/115	49/17653	0.274353	0.438353	0.370386	2040	1
GO:0006475	internal protein amino acid acetylation	2/115	158/17653	0.275083	0.438602	0.370596	10891/195814	2
GO:0007156	homophilic cell adhesion via plasma membrane adhesion molecules	2/115	158/17653	0.275083	0.438602	0.370596	1001/27253	2
GO:0030168	platelet activation	2/115	158/17653	0.275083	0.438602	0.370596	10630/6288	2
GO:0018394	peptidyl-lysine acetylation	2/115	159/17653	0.277497	0.438602	0.370596	10891/195814	2
GO:0022408	negative regulation of cell-cell adhesion	2/115	159/17653	0.277497	0.438602	0.370596	301/10288	2
GO:2001252	positive regulation of chromosome organization	2/115	159/17653	0.277497	0.438602	0.370596	10891/195814	2
GO:0010823	negative regulation of mitochondrion organization	1/115	50/17653	0.279093	0.438602	0.370596	10891	1
GO:0032655	regulation of interleukin-12 production	1/115	50/17653	0.279093	0.438602	0.370596	11213	1
GO:0032663	regulation of interleukin-2 production	1/115	50/17653	0.279093	0.438602	0.370596	301	1
GO:0032890	regulation of organic acid transport	1/115	50/17653	0.279093	0.438602	0.370596	1906	1
GO:0034113	heterotypic cell-cell adhesion	1/115	50/17653	0.279093	0.438602	0.370596	10288	1
GO:0035272	exocrine system development	1/115	50/17653	0.279093	0.438602	0.370596	7052	1
GO:0036092	phosphatidylinositol-3-phosphate biosynthetic process	1/115	50/17653	0.279093	0.438602	0.370596	2261	1
GO:0042306	regulation of protein import into nucleus	1/115	50/17653	0.279093	0.438602	0.370596	63928	1
GO:0044273	sulfur compound catabolic process	1/115	50/17653	0.279093	0.438602	0.370596	38	1
GO:0045933	positive regulation of muscle contraction	1/115	50/17653	0.279093	0.438602	0.370596	1906	1
GO:0046635	positive regulation of alpha-beta T cell activation	1/115	50/17653	0.279093	0.438602	0.370596	301	1
GO:0055078	sodium ion homeostasis	1/115	50/17653	0.279093	0.438602	0.370596	1906	1
GO:0055081	anion homeostasis	1/115	50/17653	0.279093	0.438602	0.370596	9388	1
GO:0060350	endochondral bone morphogenesis	1/115	50/17653	0.279093	0.438602	0.370596	2261	1
GO:0061971	replacement bone morphogenesis	1/115	50/17653	0.279093	0.438602	0.370596	2261	1
GO:0098659	inorganic cation import across plasma membrane	1/115	50/17653	0.279093	0.438602	0.370596	6549	1
GO:0099587	inorganic ion import across plasma membrane	1/115	50/17653	0.279093	0.438602	0.370596	6549	1
GO:2000351	regulation of endothelial cell apoptotic process	1/115	50/17653	0.279093	0.438602	0.370596	5054	1
GO:0019935	cyclic-nucleotide-mediated signaling	2/115	160/17653	0.279911	0.439286	0.371174	79849/27445	2
GO:0030307	positive regulation of cell growth	2/115	160/17653	0.279911	0.439286	0.371174	6279/1906	2
GO:0007131	reciprocal meiotic recombination	1/115	51/17653	0.283803	0.44237	0.373779	56159	1
GO:0032371	regulation of sterol transport	1/115	51/17653	0.283803	0.44237	0.373779	9388	1
GO:0032374	regulation of cholesterol transport	1/115	51/17653	0.283803	0.44237	0.373779	9388	1
GO:0035825	homologous recombination	1/115	51/17653	0.283803	0.44237	0.373779	56159	1
GO:0046426	negative regulation of JAK-STAT cascade	1/115	51/17653	0.283803	0.44237	0.373779	8651	1
GO:0050701	interleukin-1 secretion	1/115	51/17653	0.283803	0.44237	0.373779	6288	1
GO:0060997	dendritic spine morphogenesis	1/115	51/17653	0.283803	0.44237	0.373779	3706	1
GO:0070830	bicellular tight junction assembly	1/115	51/17653	0.283803	0.44237	0.373779	9076	1
GO:1904893	negative regulation of STAT cascade	1/115	51/17653	0.283803	0.44237	0.373779	8651	1
GO:2001258	negative regulation of cation channel activity	1/115	51/17653	0.283803	0.44237	0.373779	4318	1
GO:0001936	regulation of endothelial cell proliferation	2/115	162/17653	0.284737	0.443526	0.374756	23213/2152	2
GO:0051090	regulation of DNA binding transcription factor activity	4/115	416/17653	0.287109	0.44543	0.376365	11213/10891/6279/1906	4
GO:0008360	regulation of cell shape	2/115	163/17653	0.287149	0.44543	0.376365	10630/301	2
GO:1905475	regulation of protein localization to membrane	2/115	163/17653	0.287149	0.44543	0.376365	2040/5174	2
GO:0009620	response to fungus	1/115	52/17653	0.288482	0.44543	0.376365	6279	1
GO:0010676	positive regulation of cellular carbohydrate metabolic process	1/115	52/17653	0.288482	0.44543	0.376365	10891	1
GO:0032615	interleukin-12 production	1/115	52/17653	0.288482	0.44543	0.376365	11213	1
GO:0033059	cellular pigmentation	1/115	52/17653	0.288482	0.44543	0.376365	1001	1
GO:0036465	synaptic vesicle recycling	1/115	52/17653	0.288482	0.44543	0.376365	145741	1
GO:0042093	T-helper cell differentiation	1/115	52/17653	0.288482	0.44543	0.376365	301	1
GO:0045840	positive regulation of mitotic nuclear division	1/115	52/17653	0.288482	0.44543	0.376365	1906	1
GO:0046626	regulation of insulin receptor signaling pathway	1/115	52/17653	0.288482	0.44543	0.376365	8651	1
GO:0048008	platelet-derived growth factor receptor signaling pathway	1/115	52/17653	0.288482	0.44543	0.376365	2152	1
GO:0060425	lung morphogenesis	1/115	52/17653	0.288482	0.44543	0.376365	3371	1
GO:0003018	vascular process in circulatory system	2/115	164/17653	0.28956	0.446495	0.377265	4843/1906	2
GO:0051170	import into nucleus	2/115	164/17653	0.28956	0.446495	0.377265	63928/4321	2
GO:0050807	regulation of synapse organization	2/115	165/17653	0.291971	0.449585	0.379875	3706/10288	2
GO:0097193	intrinsic apoptotic signaling pathway	3/115	290/17653	0.292995	0.449585	0.379875	6279/57007/4318	3
GO:0010656	negative regulation of muscle cell apoptotic process	1/115	53/17653	0.293131	0.449585	0.379875	1906	1
GO:0043392	negative regulation of DNA binding	1/115	53/17653	0.293131	0.449585	0.379875	8091	1
GO:0043550	regulation of lipid kinase activity	1/115	53/17653	0.293131	0.449585	0.379875	2261	1
GO:0046637	regulation of alpha-beta T cell differentiation	1/115	53/17653	0.293131	0.449585	0.379875	301	1
GO:0090342	regulation of cell aging	1/115	53/17653	0.293131	0.449585	0.379875	8091	1
GO:1903428	positive regulation of reactive oxygen species biosynthetic process	1/115	53/17653	0.293131	0.449585	0.379875	1906	1
GO:0006906	vesicle fusion	2/115	166/17653	0.29438	0.450899	0.380986	145741/301	2
GO:0035967	cellular response to topologically incorrect protein	2/115	166/17653	0.29438	0.450899	0.380986	3576/11015	2
GO:0002294	CD4-positive, alpha-beta T cell differentiation involved in immune response	1/115	54/17653	0.297749	0.454241	0.38381	301	1
GO:0034394	protein localization to cell surface	1/115	54/17653	0.297749	0.454241	0.38381	2219	1
GO:0035924	cellular response to vascular endothelial growth factor stimulus	1/115	54/17653	0.297749	0.454241	0.38381	301	1
GO:0046148	pigment biosynthetic process	1/115	54/17653	0.297749	0.454241	0.38381	1001	1
GO:0050922	negative regulation of chemotaxis	1/115	54/17653	0.297749	0.454241	0.38381	11240	1
GO:1904589	regulation of protein import	1/115	54/17653	0.297749	0.454241	0.38381	63928	1
GO:0048167	regulation of synaptic plasticity	2/115	168/17653	0.299196	0.456144	0.385418	3706/10288	2
GO:0016525	negative regulation of angiogenesis	2/115	169/17653	0.301602	0.457292	0.386388	23213/5054	2
GO:0043534	blood vessel endothelial cell migration	2/115	169/17653	0.301602	0.457292	0.386388	54345/301	2
GO:0007204	positive regulation of cytosolic calcium ion concentration	3/115	295/17653	0.301889	0.457292	0.386388	6288/7052/1906	3
GO:0002287	alpha-beta T cell activation involved in immune response	1/115	55/17653	0.302338	0.457292	0.386388	301	1
GO:0002293	alpha-beta T cell differentiation involved in immune response	1/115	55/17653	0.302338	0.457292	0.386388	301	1
GO:0032922	circadian regulation of gene expression	1/115	55/17653	0.302338	0.457292	0.386388	10891	1
GO:0042130	negative regulation of T cell proliferation	1/115	55/17653	0.302338	0.457292	0.386388	10288	1
GO:0060563	neuroepithelial cell differentiation	1/115	55/17653	0.302338	0.457292	0.386388	5054	1
GO:0060688	regulation of morphogenesis of a branching structure	1/115	55/17653	0.302338	0.457292	0.386388	23213	1
GO:0070527	platelet aggregation	1/115	55/17653	0.302338	0.457292	0.386388	10630	1
GO:2000242	negative regulation of reproductive process	1/115	55/17653	0.302338	0.457292	0.386388	23213	1
GO:2000378	negative regulation of reactive oxygen species metabolic process	1/115	55/17653	0.302338	0.457292	0.386388	4314	1
GO:0043434	response to peptide hormone	4/115	427/17653	0.303201	0.458294	0.387235	3488/8651/1906/301	4
GO:0019362	pyridine nucleotide metabolic process	2/115	170/17653	0.304006	0.458606	0.387498	10891/4199	2
GO:0046496	nicotinamide nucleotide metabolic process	2/115	170/17653	0.304006	0.458606	0.387498	10891/4199	2
GO:0051099	positive regulation of binding	2/115	170/17653	0.304006	0.458606	0.387498	8091/4318	2
GO:0048568	embryonic organ development	4/115	428/17653	0.304669	0.459304	0.388088	3576/5333/54345/1906	4
GO:0010950	positive regulation of endopeptidase activity	2/115	171/17653	0.306409	0.460547	0.389138	6279/2152	2
GO:0090174	organelle membrane fusion	2/115	171/17653	0.306409	0.460547	0.389138	145741/301	2
GO:0010043	response to zinc ion	1/115	56/17653	0.306897	0.460547	0.389138	6279	1
GO:0031102	neuron projection regeneration	1/115	56/17653	0.306897	0.460547	0.389138	3371	1
GO:0046824	positive regulation of nucleocytoplasmic transport	1/115	56/17653	0.306897	0.460547	0.389138	63928	1
GO:1901862	negative regulation of muscle tissue development	1/115	56/17653	0.306897	0.460547	0.389138	3488	1
GO:2001244	positive regulation of intrinsic apoptotic signaling pathway	1/115	56/17653	0.306897	0.460547	0.389138	6279	1
GO:0035265	organ growth	2/115	172/17653	0.308811	0.462814	0.391053	2261/1906	2
GO:2000181	negative regulation of blood vessel morphogenesis	2/115	172/17653	0.308811	0.462814	0.391053	23213/5054	2
GO:0050866	negative regulation of cell activation	2/115	173/17653	0.311211	0.463707	0.391808	301/10288	2
GO:2000377	regulation of reactive oxygen species metabolic process	2/115	173/17653	0.311211	0.463707	0.391808	1906/4314	2
GO:0001836	release of cytochrome c from mitochondria	1/115	57/17653	0.311427	0.463707	0.391808	4318	1
GO:0009066	aspartate family amino acid metabolic process	1/115	57/17653	0.311427	0.463707	0.391808	51074	1
GO:0032623	interleukin-2 production	1/115	57/17653	0.311427	0.463707	0.391808	301	1
GO:0034381	plasma lipoprotein particle clearance	1/115	57/17653	0.311427	0.463707	0.391808	9388	1
GO:0045453	bone resorption	1/115	57/17653	0.311427	0.463707	0.391808	1513	1
GO:0072577	endothelial cell apoptotic process	1/115	57/17653	0.311427	0.463707	0.391808	5054	1
GO:0097306	cellular response to alcohol	1/115	57/17653	0.311427	0.463707	0.391808	54658	1
GO:1903902	positive regulation of viral life cycle	1/115	57/17653	0.311427	0.463707	0.391808	2040	1
GO:0006109	regulation of carbohydrate metabolic process	2/115	174/17653	0.31361	0.464799	0.392731	3488/10891	2
GO:0007259	JAK-STAT cascade	2/115	174/17653	0.31361	0.464799	0.392731	2261/8651	2
GO:0042098	T cell proliferation	2/115	174/17653	0.31361	0.464799	0.392731	301/10288	2
GO:0030216	keratinocyte differentiation	3/115	302/17653	0.314364	0.464799	0.392731	1513/1001/301	3
GO:1903037	regulation of leukocyte cell-cell adhesion	3/115	302/17653	0.314364	0.464799	0.392731	8651/301/10288	3
GO:0030520	intracellular estrogen receptor signaling pathway	1/115	58/17653	0.315927	0.464799	0.392731	11240	1
GO:0032768	regulation of monooxygenase activity	1/115	58/17653	0.315927	0.464799	0.392731	1001	1
GO:0033013	tetrapyrrole metabolic process	1/115	58/17653	0.315927	0.464799	0.392731	54658	1
GO:0045428	regulation of nitric oxide biosynthetic process	1/115	58/17653	0.315927	0.464799	0.392731	1906	1
GO:0045604	regulation of epidermal cell differentiation	1/115	58/17653	0.315927	0.464799	0.392731	1513	1
GO:0046173	polyol biosynthetic process	1/115	58/17653	0.315927	0.464799	0.392731	3706	1
GO:0055025	positive regulation of cardiac muscle tissue development	1/115	58/17653	0.315927	0.464799	0.392731	1906	1
GO:0097755	positive regulation of blood vessel diameter	1/115	58/17653	0.315927	0.464799	0.392731	4843	1
GO:1903672	positive regulation of sprouting angiogenesis	1/115	58/17653	0.315927	0.464799	0.392731	301	1
GO:1905207	regulation of cardiocyte differentiation	1/115	58/17653	0.315927	0.464799	0.392731	1906	1
GO:2000779	regulation of double-strand break repair	1/115	58/17653	0.315927	0.464799	0.392731	8091	1
GO:0002699	positive regulation of immune effector process	2/115	175/17653	0.316007	0.464799	0.392731	301/718	2
GO:0043902	positive regulation of multi-organism process	2/115	175/17653	0.316007	0.464799	0.392731	4843/2040	2
GO:0072524	pyridine-containing compound metabolic process	2/115	175/17653	0.316007	0.464799	0.392731	10891/4199	2
GO:0001935	endothelial cell proliferation	2/115	176/17653	0.318402	0.467125	0.394696	23213/2152	2
GO:0050803	regulation of synapse structure or activity	2/115	176/17653	0.318402	0.467125	0.394696	3706/10288	2
GO:0097696	STAT cascade	2/115	176/17653	0.318402	0.467125	0.394696	2261/8651	2
GO:2001235	positive regulation of apoptotic signaling pathway	2/115	176/17653	0.318402	0.467125	0.394696	6279/4318	2
GO:0001910	regulation of leukocyte mediated cytotoxicity	1/115	59/17653	0.320398	0.467366	0.3949	4843	1
GO:0001947	heart looping	1/115	59/17653	0.320398	0.467366	0.3949	54345	1
GO:0006968	cellular defense response	1/115	59/17653	0.320398	0.467366	0.3949	10288	1
GO:0034308	primary alcohol metabolic process	1/115	59/17653	0.320398	0.467366	0.3949	195814	1
GO:0050710	negative regulation of cytokine secretion	1/115	59/17653	0.320398	0.467366	0.3949	301	1
GO:1902041	regulation of extrinsic apoptotic signaling pathway via death domain receptors	1/115	59/17653	0.320398	0.467366	0.3949	5054	1
GO:1902305	regulation of sodium ion transmembrane transport	1/115	59/17653	0.320398	0.467366	0.3949	2040	1
GO:1904705	regulation of vascular smooth muscle cell proliferation	1/115	59/17653	0.320398	0.467366	0.3949	4318	1
GO:1990874	vascular smooth muscle cell proliferation	1/115	59/17653	0.320398	0.467366	0.3949	4318	1
GO:0008217	regulation of blood pressure	2/115	177/17653	0.320795	0.467647	0.395137	4843/1906	2
GO:0006910	phagocytosis, recognition	1/115	60/17653	0.32484	0.47073	0.397742	2219	1
GO:0010812	negative regulation of cell-substrate adhesion	1/115	60/17653	0.32484	0.47073	0.397742	5054	1
GO:0019229	regulation of vasoconstriction	1/115	60/17653	0.32484	0.47073	0.397742	1906	1
GO:0034121	regulation of toll-like receptor signaling pathway	1/115	60/17653	0.32484	0.47073	0.397742	11213	1
GO:0043297	apical junction assembly	1/115	60/17653	0.32484	0.47073	0.397742	9076	1
GO:0045143	homologous chromosome segregation	1/115	60/17653	0.32484	0.47073	0.397742	56159	1
GO:0045600	positive regulation of fat cell differentiation	1/115	60/17653	0.32484	0.47073	0.397742	10974	1
GO:0048645	animal organ formation	1/115	60/17653	0.32484	0.47073	0.397742	23213	1
GO:1901222	regulation of NIK/NF-kappaB signaling	1/115	60/17653	0.32484	0.47073	0.397742	1116	1
GO:0009314	response to radiation	4/115	442/17653	0.325305	0.47073	0.397742	8091/121457/301/10974	4
GO:0043687	post-translational protein modification	4/115	442/17653	0.325305	0.47073	0.397742	3490/3488/3371/718	4
GO:0006986	response to unfolded protein	2/115	179/17653	0.325575	0.47073	0.397742	3576/11015	2
GO:1901343	negative regulation of vasculature development	2/115	179/17653	0.325575	0.47073	0.397742	23213/5054	2
GO:0022900	electron transport chain	2/115	180/17653	0.327962	0.473585	0.400155	10891/4199	2
GO:0071478	cellular response to radiation	2/115	180/17653	0.327962	0.473585	0.400155	8091/10974	2
GO:0002292	T cell differentiation involved in immune response	1/115	61/17653	0.329254	0.474257	0.400723	301	1
GO:0031670	cellular response to nutrient	1/115	61/17653	0.329254	0.474257	0.400723	3371	1
GO:0032835	glomerulus development	1/115	61/17653	0.329254	0.474257	0.400723	23213	1
GO:0046622	positive regulation of organ growth	1/115	61/17653	0.329254	0.474257	0.400723	1906	1
GO:0033044	regulation of chromosome organization	3/115	311/17653	0.330423	0.475644	0.401894	11240/10891/195814	3
GO:0034765	regulation of ion transmembrane transport	4/115	446/17653	0.331222	0.476495	0.402613	10891/2040/4318/5174	4
GO:0001701	in utero embryonic development	3/115	312/17653	0.332208	0.477614	0.403559	5333/54345/1906	3
GO:0006612	protein targeting to membrane	2/115	182/17653	0.332729	0.478064	0.403939	2040/5174	2
GO:0015909	long-chain fatty acid transport	1/115	62/17653	0.333638	0.478771	0.404536	301	1
GO:0060193	positive regulation of lipase activity	1/115	62/17653	0.333638	0.478771	0.404536	2261	1
GO:0045333	cellular respiration	2/115	183/17653	0.335109	0.480281	0.405813	10891/4843	2
GO:1903531	negative regulation of secretion by cell	2/115	183/17653	0.335109	0.480281	0.405813	1906/301	2
GO:0051235	maintenance of location	3/115	314/17653	0.335777	0.480938	0.406368	6279/718/11015	3
GO:0003012	muscle system process	4/115	450/17653	0.337146	0.481113	0.406516	3488/10891/23213/1906	4
GO:0016570	histone modification	4/115	450/17653	0.337146	0.481113	0.406516	8091/11240/10891/195814	4
GO:0051656	establishment of organelle localization	4/115	450/17653	0.337146	0.481113	0.406516	1001/145741/27445/26286	4
GO:0051251	positive regulation of lymphocyte activation	3/115	315/17653	0.337561	0.481113	0.406516	8651/301/10288	3
GO:0002260	lymphocyte homeostasis	1/115	63/17653	0.337995	0.481113	0.406516	124976	1
GO:0042246	tissue regeneration	1/115	63/17653	0.337995	0.481113	0.406516	301	1
GO:0046888	negative regulation of hormone secretion	1/115	63/17653	0.337995	0.481113	0.406516	1906	1
GO:0048857	neural nucleus development	1/115	63/17653	0.337995	0.481113	0.406516	11240	1
GO:0051785	positive regulation of nuclear division	1/115	63/17653	0.337995	0.481113	0.406516	1906	1
GO:0071230	cellular response to amino acid stimulus	1/115	63/17653	0.337995	0.481113	0.406516	8651	1
GO:0060562	epithelial tube morphogenesis	3/115	316/17653	0.339345	0.482737	0.407887	54345/3371/1906	3
GO:0007369	gastrulation	2/115	186/17653	0.342235	0.484272	0.409184	8091/4318	2
GO:2001020	regulation of response to DNA damage stimulus	2/115	186/17653	0.342235	0.484272	0.409184	8091/57007	2
GO:0019915	lipid storage	1/115	64/17653	0.342323	0.484272	0.409184	718	1
GO:0042698	ovulation cycle	1/115	64/17653	0.342323	0.484272	0.409184	301	1
GO:0043367	CD4-positive, alpha-beta T cell differentiation	1/115	64/17653	0.342323	0.484272	0.409184	301	1
GO:0046686	response to cadmium ion	1/115	64/17653	0.342323	0.484272	0.409184	4318	1
GO:0046782	regulation of viral transcription	1/115	64/17653	0.342323	0.484272	0.409184	8091	1
GO:0050891	multicellular organismal water homeostasis	1/115	64/17653	0.342323	0.484272	0.409184	9076	1
GO:0061371	determination of heart left/right asymmetry	1/115	64/17653	0.342323	0.484272	0.409184	54345	1
GO:0006733	oxidoreduction coenzyme metabolic process	2/115	187/17653	0.344605	0.4869	0.411405	10891/4199	2
GO:0034764	positive regulation of transmembrane transport	2/115	187/17653	0.344605	0.4869	0.411405	718/5174	2
GO:0003143	embryonic heart tube morphogenesis	1/115	65/17653	0.346623	0.487545	0.41195	54345	1
GO:0006940	regulation of smooth muscle contraction	1/115	65/17653	0.346623	0.487545	0.41195	1906	1
GO:0007585	respiratory gaseous exchange	1/115	65/17653	0.346623	0.487545	0.41195	1906	1
GO:0051926	negative regulation of calcium ion transport	1/115	65/17653	0.346623	0.487545	0.41195	10288	1
GO:1900182	positive regulation of protein localization to nucleus	1/115	65/17653	0.346623	0.487545	0.41195	63928	1
GO:1901616	organic hydroxy compound catabolic process	1/115	65/17653	0.346623	0.487545	0.41195	79644	1
GO:0006338	chromatin remodeling	2/115	188/17653	0.346973	0.487545	0.41195	8091/11240	2
GO:0010952	positive regulation of peptidase activity	2/115	188/17653	0.346973	0.487545	0.41195	6279/2152	2
GO:0031032	actomyosin structure organization	2/115	188/17653	0.346973	0.487545	0.41195	54566/1906	2
GO:0072503	cellular divalent inorganic cation homeostasis	4/115	457/17653	0.347523	0.48802	0.412352	6288/6279/7052/1906	4
GO:0050863	regulation of T cell activation	3/115	321/17653	0.348261	0.488758	0.412975	8651/301/10288	3
GO:0006006	glucose metabolic process	2/115	189/17653	0.349337	0.489968	0.413998	3488/10891	2
GO:0010611	regulation of cardiac muscle hypertrophy	1/115	66/17653	0.350895	0.491253	0.415083	1906	1
GO:0030858	positive regulation of epithelial cell differentiation	1/115	66/17653	0.350895	0.491253	0.415083	5054	1
GO:1902117	positive regulation of organelle assembly	1/115	66/17653	0.350895	0.491253	0.415083	1906	1
GO:0006333	chromatin assembly or disassembly	2/115	190/17653	0.351699	0.491779	0.415528	8091/11240	2
GO:0006473	protein acetylation	2/115	190/17653	0.351699	0.491779	0.415528	10891/195814	2
GO:0051051	negative regulation of transport	4/115	460/17653	0.351974	0.491863	0.415599	1906/301/10288/4318	4
GO:0043401	steroid hormone mediated signaling pathway	2/115	191/17653	0.354058	0.494182	0.417558	11240/10891	2
GO:0006110	regulation of glycolytic process	1/115	67/17653	0.355139	0.494182	0.417558	10891	1
GO:0006695	cholesterol biosynthetic process	1/115	67/17653	0.355139	0.494182	0.417558	3158	1
GO:0019748	secondary metabolic process	1/115	67/17653	0.355139	0.494182	0.417558	1001	1
GO:0030521	androgen receptor signaling pathway	1/115	67/17653	0.355139	0.494182	0.417558	10891	1
GO:0042531	positive regulation of tyrosine phosphorylation of STAT protein	1/115	67/17653	0.355139	0.494182	0.417558	2261	1
GO:0071479	cellular response to ionizing radiation	1/115	67/17653	0.355139	0.494182	0.417558	8091	1
GO:0051480	regulation of cytosolic calcium ion concentration	3/115	325/17653	0.355387	0.494227	0.417596	6288/7052/1906	3
GO:0016569	covalent chromatin modification	4/115	464/17653	0.357909	0.497337	0.420224	8091/11240/10891/195814	4
GO:0006901	vesicle coating	1/115	68/17653	0.359356	0.497337	0.420224	26286	1
GO:0009247	glycolipid biosynthetic process	1/115	68/17653	0.359356	0.497337	0.420224	80235	1
GO:0045913	positive regulation of carbohydrate metabolic process	1/115	68/17653	0.359356	0.497337	0.420224	10891	1
GO:0048678	response to axon injury	1/115	68/17653	0.359356	0.497337	0.420224	3371	1
GO:0050688	regulation of defense response to virus	1/115	68/17653	0.359356	0.497337	0.420224	4321	1
GO:0060998	regulation of dendritic spine development	1/115	68/17653	0.359356	0.497337	0.420224	3706	1
GO:0070192	chromosome organization involved in meiotic cell cycle	1/115	68/17653	0.359356	0.497337	0.420224	56159	1
GO:0032147	activation of protein kinase activity	3/115	328/17653	0.360725	0.498931	0.421571	1116/6288/8651	3
GO:0006026	aminoglycan catabolic process	1/115	69/17653	0.363546	0.499522	0.42207	1116	1
GO:0030239	myofibril assembly	1/115	69/17653	0.363546	0.499522	0.42207	1906	1
GO:0032945	negative regulation of mononuclear cell proliferation	1/115	69/17653	0.363546	0.499522	0.42207	10288	1
GO:0036498	IRE1-mediated unfolded protein response	1/115	69/17653	0.363546	0.499522	0.42207	11015	1
GO:0043242	negative regulation of protein complex disassembly	1/115	69/17653	0.363546	0.499522	0.42207	11213	1
GO:0048708	astrocyte differentiation	1/115	69/17653	0.363546	0.499522	0.42207	6279	1
GO:0050672	negative regulation of lymphocyte proliferation	1/115	69/17653	0.363546	0.499522	0.42207	10288	1
GO:0051155	positive regulation of striated muscle cell differentiation	1/115	69/17653	0.363546	0.499522	0.42207	1906	1
GO:0055021	regulation of cardiac muscle tissue growth	1/115	69/17653	0.363546	0.499522	0.42207	1906	1
GO:0071300	cellular response to retinoic acid	1/115	69/17653	0.363546	0.499522	0.42207	3371	1
GO:1900006	positive regulation of dendrite development	1/115	69/17653	0.363546	0.499522	0.42207	3706	1
GO:0022604	regulation of cell morphogenesis	4/115	468/17653	0.363844	0.499633	0.422164	10630/3706/301/10562	4
GO:0030098	lymphocyte differentiation	3/115	330/17653	0.364281	0.499934	0.422418	8651/301/10288	3
ID	Description	GeneRatio	BgRatio	pvalue	p.adjust	qvalue	geneID	Count
GO:0042119	neutrophil activation	15/115	498/17653	8.32e-07	0.00132567	0.00112012	1116/79888/3576/11240/5328/2040/2219/6279/4069/6282/10288/4318/718/5476/10562	15
GO:0002526	acute inflammatory response	10/115	215/17653	1.43e-06	0.00132567	0.00112012	6288/715/717/722/6279/725/2152/3426/54658/718	10
GO:0043062	extracellular structure organization	13/115	395/17653	1.8e-06	0.00132567	0.00112012	1513/10630/4321/25975/7045/284217/23213/9388/5054/3371/4319/4318/4314	13
GO:0030198	extracellular matrix organization	12/115	341/17653	2.31e-06	0.00132567	0.00112012	1513/10630/4321/25975/7045/284217/23213/5054/3371/4319/4318/4314	12
GO:0043312	neutrophil degranulation	14/115	485/17653	3.26e-06	0.00134024	0.00113243	1116/79888/11240/5328/2040/2219/6279/4069/6282/10288/4318/718/5476/10562	14
GO:0002283	neutrophil activation involved in immune response	14/115	488/17653	3.5e-06	0.00134024	0.00113243	1116/79888/11240/5328/2040/2219/6279/4069/6282/10288/4318/718/5476/10562	14
GO:0002446	neutrophil mediated immunity	14/115	500/17653	4.63e-06	0.00151936	0.00128378	1116/79888/11240/5328/2040/2219/6279/4069/6282/10288/4318/718/5476/10562	14
GO:0006959	humoral immune response	11/115	329/17653	1.01e-05	0.00290148	0.0024516	715/717/722/124976/2219/6279/725/4069/3426/54210/718	11
GO:0050727	regulation of inflammatory response	12/115	411/17653	1.53e-05	0.00391502	0.00330799	6288/715/717/4843/722/5054/6279/7052/725/3426/301/718	12
GO:0002920	regulation of humoral immune response	7/115	125/17653	1.75e-05	0.00402651	0.00340219	715/717/722/124976/725/3426/718	7
GO:0042044	fluid transport	4/115	26/17653	2.29e-05	0.00467022	0.00394609	79849/1906/366/343	4
GO:0072376	protein activation cascade	8/115	182/17653	2.53e-05	0.00467022	0.00394609	715/717/722/2219/725/2152/3426/718	8
GO:0061448	connective tissue development	9/115	240/17653	2.75e-05	0.00467022	0.00394609	1116/25884/38/8091/10891/7045/2261/23213/1906	9
GO:1901570	fatty acid derivative biosynthetic process	6/115	91/17653	2.85e-05	0.00467022	0.00394609	2182/38/60481/1906/301/3158	6
GO:0072606	interleukin-8 secretion	4/115	28/17653	3.1e-05	0.00474681	0.00401081	1116/4843/2219/301	4
GO:0022617	extracellular matrix disassembly	6/115	94/17653	3.42e-05	0.00491324	0.00415143	1513/10630/4321/4319/4318/4314	6
GO:0032496	response to lipopolysaccharide	10/115	327/17653	5.54e-05	0.0074797	0.00631995	9076/3576/11213/10891/4843/5054/6279/1906/54658/10288	10
GO:0030449	regulation of complement activation	6/115	107/17653	7.1e-05	0.00852679	0.00720469	715/717/722/725/3426/718	6
GO:0031282	regulation of guanylate cyclase activity	3/115	13/17653	7.34e-05	0.00852679	0.00720469	79849/4843/2980	3
GO:2000257	regulation of protein activation cascade	6/115	108/17653	7.47e-05	0.00852679	0.00720469	715/717/722/725/3426/718	6
GO:0030574	collagen catabolic process	5/115	68/17653	8.08e-05	0.00852679	0.00720469	1513/4321/4319/4318/4314	5
GO:0006956	complement activation	7/115	159/17653	8.18e-05	0.00852679	0.00720469	715/717/722/2219/725/3426/718	7
GO:0002237	response to molecule of bacterial origin	10/115	345/17653	8.65e-05	0.00852679	0.00720469	9076/3576/11213/10891/4843/5054/6279/1906/54658/10288	10
GO:1901568	fatty acid derivative metabolic process	7/115	162/17653	9.2e-05	0.00852679	0.00720469	2182/38/8824/60481/1906/301/3158	7
GO:0032637	interleukin-8 production	5/115	70/17653	9.28e-05	0.00852679	0.00720469	1116/4843/5054/2219/301	5
GO:0070613	regulation of protein processing	7/115	167/17653	0.000111213	0.009821	0.00829823	715/717/722/5054/725/3426/718	7
GO:1903317	regulation of protein maturation	7/115	169/17653	0.000119779	0.0101857	0.00860634	715/717/722/5054/725/3426/718	7
GO:0019216	regulation of lipid metabolic process	10/115	366/17653	0.000140392	0.0115121	0.00972714	79888/3490/10891/60481/2261/54658/301/3158/718/4199	10
GO:0030193	regulation of blood coagulation	5/115	78/17653	0.000155386	0.0118665	0.0100265	10630/5328/5054/2152/1906	5
GO:1900046	regulation of hemostasis	5/115	78/17653	0.000155386	0.0118665	0.0100265	10630/5328/5054/2152/1906	5
GO:0006631	fatty acid metabolic process	10/115	372/17653	0.000160218	0.0118665	0.0100265	2182/38/8824/10891/60481/23600/1906/80221/301/718	10
GO:0043277	apoptotic cell clearance	4/115	43/17653	0.000173364	0.0124389	0.0105102	717/2219/7052/718	4
GO:0006958	complement activation, classical pathway	6/115	128/17653	0.000190653	0.0132648	0.0112081	715/717/722/725/3426/718	6
GO:0051216	cartilage development	7/115	184/17653	0.000202623	0.013683	0.0115614	1116/25884/8091/7045/2261/23213/1906	7
GO:0006694	steroid biosynthetic process	7/115	186/17653	0.000216508	0.01405	0.0118715	38/3490/79644/10891/23600/79154/3158	7
GO:0050818	regulation of coagulation	5/115	84/17653	0.000220296	0.01405	0.0118715	10630/5328/5054/2152/1906	5
GO:0006833	water transport	3/115	19/17653	0.000241848	0.0147718	0.0124814	79849/366/343	3
GO:0061041	regulation of wound healing	6/115	134/17653	0.000244482	0.0147718	0.0124814	10630/5328/5054/2152/1906/301	6
GO:0045766	positive regulation of angiogenesis	7/115	193/17653	0.000271277	0.0159705	0.0134943	1116/8091/3576/5054/2152/301/718	7
GO:0002455	humoral immune response mediated by circulating immunoglobulin	6/115	139/17653	0.000297908	0.0165528	0.0139863	715/717/722/725/3426/718	6
GO:0050663	cytokine secretion	7/115	196/17653	0.000297925	0.0165528	0.0139863	1116/6288/4321/4843/8651/2219/301	7
GO:0016485	protein processing	9/115	329/17653	0.000302796	0.0165528	0.0139863	715/717/5328/722/5054/725/2152/3426/718	9
GO:0002697	regulation of immune effector process	10/115	405/17653	0.000316601	0.016905	0.0142838	715/717/11213/4321/722/725/3426/301/9865/718	10
GO:0014812	muscle cell migration	5/115	93/17653	0.000354024	0.0182421	0.0154136	3488/10891/5328/5054/301	5
GO:0030595	leukocyte chemotaxis	7/115	202/17653	0.000357532	0.0182421	0.0154136	6288/3576/11240/5054/6279/1906/301	7
GO:0030826	regulation of cGMP biosynthetic process	3/115	22/17653	0.000378925	0.0189133	0.0159807	79849/4843/2980	3
GO:0071398	cellular response to fatty acid	4/115	53/17653	0.000391267	0.0191138	0.0161502	9076/10891/3371/1906	4
GO:0090303	positive regulation of wound healing	4/115	54/17653	0.00042046	0.020112	0.0169936	10630/5054/2152/301	4
GO:0002673	regulation of acute inflammatory response	6/115	149/17653	0.000432027	0.0202435	0.0171047	715/717/722/725/3426/718	6
GO:1904018	positive regulation of vasculature development	7/115	215/17653	0.000519608	0.0238604	0.0201608	1116/8091/3576/5054/2152/301/718	7
GO:0006637	acyl-CoA metabolic process	5/115	103/17653	0.000566364	0.0250072	0.0211297	2182/38/60481/80221/3158	5
GO:0035383	thioester metabolic process	5/115	103/17653	0.000566364	0.0250072	0.0211297	2182/38/60481/80221/3158	5
GO:0071621	granulocyte chemotaxis	5/115	105/17653	0.000618314	0.0262044	0.0221414	6288/3576/6279/1906/301	5
GO:0030194	positive regulation of blood coagulation	3/115	26/17653	0.00062772	0.0262044	0.0221414	10630/5054/2152	3
GO:1900048	positive regulation of hemostasis	3/115	26/17653	0.00062772	0.0262044	0.0221414	10630/5054/2152	3
GO:1903034	regulation of response to wounding	6/115	161/17653	0.000650605	0.0266748	0.0225388	10630/5328/5054/2152/1906/301	6
GO:0050820	positive regulation of coagulation	3/115	27/17653	0.000702845	0.0283111	0.0239214	10630/5054/2152	3
GO:0030823	regulation of cGMP metabolic process	3/115	28/17653	0.000783465	0.0306615	0.0259074	79849/4843/2980	3
GO:0046890	regulation of lipid biosynthetic process	6/115	167/17653	0.000787906	0.0306615	0.0259074	79888/3490/10891/60481/301/718	6
GO:1903036	positive regulation of response to wounding	4/115	64/17653	0.000803566	0.0307498	0.025982	10630/5054/2152/301	4
GO:0015711	organic anion transport	10/115	460/17653	0.000851195	0.0320384	0.0270708	2182/4843/6584/766/11254/8671/1906/301/366/759	10
GO:0034754	cellular hormone metabolic process	5/115	115/17653	0.00093346	0.0345681	0.0292083	79644/10891/79154/195814/54658	5
GO:0008202	steroid metabolic process	8/115	311/17653	0.000982161	0.0354499	0.0299533	38/3490/79644/10891/23600/79154/54658/3158	8
GO:0050900	leukocyte migration	10/115	470/17653	0.00100193	0.0354499	0.0299533	6288/3576/11240/124976/5054/6279/1906/301/4318/54210	10
GO:0051604	protein maturation	9/115	390/17653	0.00102476	0.0354499	0.0299533	715/717/5328/722/5054/725/2152/3426/718	9
GO:0014912	negative regulation of smooth muscle cell migration	3/115	31/17653	0.00105983	0.0354499	0.0299533	3488/10891/5054	3
GO:0046949	fatty-acyl-CoA biosynthetic process	3/115	31/17653	0.00105983	0.0354499	0.0299533	2182/38/60481	3
GO:0045785	positive regulation of cell adhesion	9/115	392/17653	0.00106204	0.0354499	0.0299533	10630/6288/54566/25975/8651/7052/301/10288/10562	9
GO:0097529	myeloid leukocyte migration	6/115	177/17653	0.00106535	0.0354499	0.0299533	6288/3576/5054/6279/1906/301	6
GO:0097530	granulocyte migration	5/115	119/17653	0.0010882	0.0356931	0.0301588	6288/3576/6279/1906/301	5
GO:0071241	cellular response to inorganic substance	6/115	180/17653	0.00116168	0.0371168	0.0313618	63928/9076/10891/1906/4318/4314	6
GO:0045923	positive regulation of fatty acid metabolic process	3/115	32/17653	0.00116394	0.0371168	0.0313618	10891/60481/301	3
GO:0030335	positive regulation of cell migration	10/115	486/17653	0.00128827	0.0405187	0.0342362	10630/54566/3576/5328/5054/2152/1906/57007/301/4318	10
GO:0032963	collagen metabolic process	5/115	124/17653	0.00130747	0.0405669	0.0342769	1513/4321/4319/4318/4314	5
GO:0014910	regulation of smooth muscle cell migration	4/115	74/17653	0.0013844	0.0418236	0.0353387	3488/10891/5328/5054	4
GO:0050764	regulation of phagocytosis	4/115	74/17653	0.0013844	0.0418236	0.0353387	717/722/725/718	4
GO:0001501	skeletal system development	10/115	493/17653	0.00143299	0.0427292	0.036104	1116/25884/8091/7045/2261/23213/124976/1906/23508/4318	10
GO:0010165	response to X-ray	3/115	35/17653	0.00151425	0.044009	0.0371853	8091/121457/301	3
GO:0071392	cellular response to estradiol stimulus	3/115	35/17653	0.00151425	0.044009	0.0371853	6751/10891/54658	3
GO:0006692	prostanoid metabolic process	3/115	36/17653	0.00164411	0.0466035	0.0393775	8824/1906/301	3
GO:0006693	prostaglandin metabolic process	3/115	36/17653	0.00164411	0.0466035	0.0393775	8824/1906/301	3
GO:0035690	cellular response to drug	8/115	340/17653	0.00172938	0.0484227	0.0409147	8091/10891/4843/1906/54658/301/10974/4314	8
GO:0002713	negative regulation of B cell mediated immunity	2/115	10/17653	0.00182965	0.0485541	0.0410257	722/725	2
GO:0002890	negative regulation of immunoglobulin mediated immune response	2/115	10/17653	0.00182965	0.0485541	0.0410257	722/725	2
GO:0002923	regulation of humoral immune response mediated by circulating immunoglobulin	2/115	10/17653	0.00182965	0.0485541	0.0410257	722/725	2
GO:0051547	regulation of keratinocyte migration	2/115	10/17653	0.00182965	0.0485541	0.0410257	54566/4318	2
GO:0016064	immunoglobulin mediated immune response	6/115	197/17653	0.00183981	0.0485541	0.0410257	715/717/722/725/3426/718	6
GO:0019724	B cell mediated immunity	6/115	198/17653	0.00188741	0.0492441	0.0416087	715/717/722/725/3426/718	6
GO:0070542	response to fatty acid	4/115	81/17653	0.00193319	0.0498719	0.0421392	9076/10891/3371/1906	4
GO:0014909	smooth muscle cell migration	4/115	82/17653	0.00202224	0.0506438	0.0427914	3488/10891/5328/5054	4
GO:0070098	chemokine-mediated signaling pathway	4/115	82/17653	0.00202224	0.0506438	0.0427914	3576/11240/1906/57007	4
GO:1903900	regulation of viral life cycle	5/115	137/17653	0.00202928	0.0506438	0.0427914	8091/10581/3576/2040/2219	5
GO:0060326	cell chemotaxis	7/115	273/17653	0.00207586	0.0512492	0.0433029	6288/3576/11240/5054/6279/1906/301	7
GO:0002921	negative regulation of humoral immune response	2/115	11/17653	0.00222674	0.0523033	0.0441936	722/725	2
GO:0031284	positive regulation of guanylate cyclase activity	2/115	11/17653	0.00222674	0.0523033	0.0441936	4843/2980	2
GO:0045091	regulation of single stranded viral RNA replication via double stranded DNA intermediate	2/115	11/17653	0.00222674	0.0523033	0.0441936	8091/3576	2
GO:0046950	cellular ketone body metabolic process	2/115	11/17653	0.00222674	0.0523033	0.0441936	38/3158	2
GO:0035337	fatty-acyl-CoA metabolic process	3/115	40/17653	0.00223246	0.0523033	0.0441936	2182/38/60481	3
GO:0050777	negative regulation of immune response	5/115	141/17653	0.00230062	0.0533559	0.0450829	11213/4321/722/725/301	5
GO:0006182	cGMP biosynthetic process	3/115	41/17653	0.00239736	0.0534811	0.0451887	79849/4843/2980	3
GO:0010955	negative regulation of protein processing	3/115	41/17653	0.00239736	0.0534811	0.0451887	722/5054/725	3
GO:1903318	negative regulation of protein maturation	3/115	41/17653	0.00239736	0.0534811	0.0451887	722/5054/725	3
GO:0048661	positive regulation of smooth muscle cell proliferation	4/115	86/17653	0.00240686	0.0534811	0.0451887	10891/7052/1906/4318	4
GO:0048660	regulation of smooth muscle cell proliferation	5/115	143/17653	0.00244578	0.0534811	0.0451887	3488/10891/7052/1906/4318	5
GO:0051384	response to glucocorticoid	5/115	143/17653	0.00244578	0.0534811	0.0451887	3490/9076/1906/54658/301	5
GO:0032309	icosanoid secretion	3/115	42/17653	0.00256962	0.0543695	0.0459394	4843/1906/301	3
GO:0030593	neutrophil chemotaxis	4/115	88/17653	0.00261684	0.0543695	0.0459394	6288/3576/6279/1906	4
GO:0045069	regulation of viral genome replication	4/115	88/17653	0.00261684	0.0543695	0.0459394	8091/10581/3576/2040	4
GO:0008228	opsonization	2/115	12/17653	0.00266073	0.0543695	0.0459394	722/725	2
GO:0039692	single stranded viral RNA replication via double stranded DNA intermediate	2/115	12/17653	0.00266073	0.0543695	0.0459394	8091/3576	2
GO:0045591	positive regulation of regulatory T cell differentiation	2/115	12/17653	0.00266073	0.0543695	0.0459394	8651/10288	2
GO:1902224	ketone body metabolic process	2/115	12/17653	0.00266073	0.0543695	0.0459394	38/3158	2
GO:0048659	smooth muscle cell proliferation	5/115	146/17653	0.00267585	0.0543695	0.0459394	3488/10891/7052/1906/4318	5
GO:0015908	fatty acid transport	4/115	89/17653	0.0027264	0.0544179	0.0459803	2182/4843/1906/301	4
GO:0045765	regulation of angiogenesis	8/115	366/17653	0.00272968	0.0544179	0.0459803	1116/8091/3576/23213/5054/2152/301/718	8
GO:0006636	unsaturated fatty acid biosynthetic process	3/115	43/17653	0.00274934	0.0544179	0.0459803	60481/1906/301	3
GO:0032103	positive regulation of response to external stimulus	7/115	289/17653	0.00285379	0.0560025	0.0473192	3576/5054/6279/7052/2152/1906/718	7
GO:0015701	bicarbonate transport	3/115	44/17653	0.00293662	0.0571397	0.0482801	766/8671/759	3
GO:0015697	quaternary ammonium group transport	2/115	13/17653	0.00313114	0.0575209	0.0486021	6584/5174	2
GO:0017014	protein nitrosylation	2/115	13/17653	0.00313114	0.0575209	0.0486021	4843/6279	2
GO:0018119	peptidyl-cysteine S-nitrosylation	2/115	13/17653	0.00313114	0.0575209	0.0486021	4843/6279	2
GO:0032310	prostaglandin secretion	2/115	13/17653	0.00313114	0.0575209	0.0486021	4843/1906	2
GO:0043568	positive regulation of insulin-like growth factor receptor signaling pathway	2/115	13/17653	0.00313114	0.0575209	0.0486021	1001/3488	2
GO:0071715	icosanoid transport	3/115	45/17653	0.00313158	0.0575209	0.0486021	4843/1906/301	3
GO:1901571	fatty acid derivative transport	3/115	45/17653	0.00313158	0.0575209	0.0486021	4843/1906/301	3
GO:0010876	lipid localization	8/115	377/17653	0.00326932	0.0595742	0.0503371	2182/4843/9388/124976/1906/301/366/718	8
GO:0002712	regulation of B cell mediated immunity	3/115	46/17653	0.00333431	0.0598092	0.0505356	722/725/718	3
GO:0002889	regulation of immunoglobulin mediated immune response	3/115	46/17653	0.00333431	0.0598092	0.0505356	722/725/718	3
GO:0031349	positive regulation of defense response	9/115	466/17653	0.00343142	0.0610739	0.0516043	1513/11213/4321/5054/2219/6279/7052/9865/718	9
GO:0071248	cellular response to metal ion	5/115	156/17653	0.00355655	0.0628142	0.0530747	63928/9076/10891/1906/4318	5
GO:0002062	chondrocyte differentiation	4/115	97/17653	0.00371828	0.0651693	0.0550646	8091/7045/2261/23213	4
GO:0015718	monocarboxylic acid transport	5/115	158/17653	0.00375497	0.0653138	0.0551867	2182/4843/1906/301/366	5
GO:0031960	response to corticosteroid	5/115	160/17653	0.00396122	0.068027	0.0574793	3490/9076/1906/54658/301	5
GO:0030850	prostate gland development	3/115	49/17653	0.00399006	0.068027	0.0574793	23213/3371/301	3
GO:1990266	neutrophil migration	4/115	99/17653	0.00399985	0.068027	0.0574793	6288/3576/6279/1906	4
GO:0001946	lymphangiogenesis	2/115	15/17653	0.0041793	0.0690337	0.0583298	10630/54345	2
GO:0009812	flavonoid metabolic process	2/115	15/17653	0.0041793	0.0690337	0.0583298	10891/54658	2
GO:0045723	positive regulation of fatty acid biosynthetic process	2/115	15/17653	0.0041793	0.0690337	0.0583298	60481/301	2
GO:0051546	keratinocyte migration	2/115	15/17653	0.0041793	0.0690337	0.0583298	54566/4318	2
GO:1901342	regulation of vasculature development	8/115	396/17653	0.00439349	0.0697401	0.0589267	1116/8091/3576/23213/5054/2152/301/718	8
GO:0006885	regulation of pH	4/115	102/17653	0.00444873	0.0697401	0.0589267	6549/766/8671/1906	4
GO:0030195	negative regulation of blood coagulation	3/115	51/17653	0.00446778	0.0697401	0.0589267	5328/5054/1906	3
GO:0031638	zymogen activation	3/115	51/17653	0.00446778	0.0697401	0.0589267	715/5328/5054	3
GO:0035384	thioester biosynthetic process	3/115	51/17653	0.00446778	0.0697401	0.0589267	2182/38/60481	3
GO:0071320	cellular response to cAMP	3/115	51/17653	0.00446778	0.0697401	0.0589267	3488/366/343	3
GO:0071616	acyl-CoA biosynthetic process	3/115	51/17653	0.00446778	0.0697401	0.0589267	2182/38/60481	3
GO:1900047	negative regulation of hemostasis	3/115	51/17653	0.00446778	0.0697401	0.0589267	5328/5054/1906	3
GO:0002460	adaptive immune response based on somatic recombination of immune receptors built from immunoglobulin superfamily domains	7/115	314/17653	0.00449544	0.0697401	0.0589267	715/717/722/725/3426/301/718	7
GO:0033559	unsaturated fatty acid metabolic process	4/115	103/17653	0.00460559	0.0708482	0.059863	8824/60481/1906/301	4
GO:0062013	positive regulation of small molecule metabolic process	5/115	166/17653	0.00462859	0.0708482	0.059863	10891/4843/60481/2980/301	5
GO:0002643	regulation of tolerance induction	2/115	16/17653	0.00475609	0.070909	0.0599144	11213/10288	2
GO:0015732	prostaglandin transport	2/115	16/17653	0.00475609	0.070909	0.0599144	4843/1906	2
GO:0035988	chondrocyte proliferation	2/115	16/17653	0.00475609	0.070909	0.0599144	8091/2261	2
GO:0048535	lymph node development	2/115	16/17653	0.00475609	0.070909	0.0599144	10630/124976	2
GO:1901617	organic hydroxy compound biosynthetic process	6/115	240/17653	0.00487254	0.0721765	0.0609854	38/3706/1001/79644/23600/3158	6
GO:0002698	negative regulation of immune effector process	4/115	105/17653	0.00493041	0.0723491	0.0611312	11213/722/725/301	4
GO:0001960	negative regulation of cytokine-mediated signaling pathway	3/115	53/17653	0.00497873	0.0723491	0.0611312	11213/11240/4321	3
GO:0046068	cGMP metabolic process	3/115	53/17653	0.00497873	0.0723491	0.0611312	79849/4843/2980	3
GO:0001959	regulation of cytokine-mediated signaling pathway	5/115	172/17653	0.00537241	0.0770941	0.0651405	11213/11240/4321/8651/1906	5
GO:0050707	regulation of cytokine secretion	5/115	172/17653	0.00537241	0.0770941	0.0651405	6288/4321/8651/2219/301	5
GO:0001819	positive regulation of cytokine production	8/115	411/17653	0.0054749	0.0780768	0.0659708	6288/4321/23213/5054/2219/301/10288/718	8
GO:0071222	cellular response to lipopolysaccharide	5/115	174/17653	0.00563812	0.0799082	0.0675182	3576/10891/4843/5054/10288	5
GO:0031279	regulation of cyclase activity	3/115	56/17653	0.00580882	0.0812073	0.068616	79849/4843/2980	3
GO:0050819	negative regulation of coagulation	3/115	56/17653	0.00580882	0.0812073	0.068616	5328/5054/1906	3
GO:0006909	phagocytosis	7/115	330/17653	0.00586941	0.0812073	0.068616	717/722/2219/7052/725/301/718	7
GO:0002685	regulation of leukocyte migration	5/115	176/17653	0.00591299	0.0812073	0.068616	3576/11240/5054/1906/301	5
GO:0002688	regulation of leukocyte chemotaxis	4/115	111/17653	0.00599636	0.0812073	0.068616	3576/11240/5054/1906	4
GO:0035338	long-chain fatty-acyl-CoA biosynthetic process	2/115	18/17653	0.00601274	0.0812073	0.068616	2182/60481	2
GO:0036303	lymph vessel morphogenesis	2/115	18/17653	0.00601274	0.0812073	0.068616	10630/54345	2
GO:0051195	negative regulation of cofactor metabolic process	2/115	18/17653	0.00601274	0.0812073	0.068616	10891/4314	2
GO:0051339	regulation of lyase activity	3/115	57/17653	0.00610279	0.0814652	0.0688338	79849/4843/2980	3
GO:0060761	negative regulation of response to cytokine stimulus	3/115	57/17653	0.00610279	0.0814652	0.0688338	11213/11240/4321	3
GO:0010038	response to metal ion	7/115	334/17653	0.00625735	0.0830455	0.0701691	63928/9076/10891/6279/1906/366/4318	7
GO:0048871	multicellular organismal homeostasis	7/115	335/17653	0.00635726	0.0838866	0.0708798	1513/79888/1001/9076/10891/6584/4069	7
GO:0060759	regulation of response to cytokine stimulus	5/115	180/17653	0.00649085	0.08516	0.0719558	11213/11240/4321/8651/1906	5
GO:0002221	pattern recognition receptor signaling pathway	5/115	181/17653	0.0066413	0.0852427	0.0720257	1513/11213/2219/6279/9865	5
GO:0030828	positive regulation of cGMP biosynthetic process	2/115	19/17653	0.00669167	0.0852427	0.0720257	4843/2980	2
GO:0046597	negative regulation of viral entry into host cell	2/115	19/17653	0.00669167	0.0852427	0.0720257	10581/2219	2
GO:1902170	cellular response to reactive nitrogen species	2/115	19/17653	0.00669167	0.0852427	0.0720257	10891/4314	2
GO:0050918	positive chemotaxis	3/115	59/17653	0.00671705	0.0852427	0.0720257	6288/3576/2152	3
GO:0019079	viral genome replication	4/115	115/17653	0.00678623	0.0852427	0.0720257	8091/10581/3576/2040	4
GO:0046717	acid secretion	4/115	115/17653	0.00678623	0.0852427	0.0720257	4843/1906/301/366	4
GO:0071219	cellular response to molecule of bacterial origin	5/115	182/17653	0.00679417	0.0852427	0.0720257	3576/10891/4843/5054/10288	5
GO:0007596	blood coagulation	7/115	341/17653	0.00698197	0.0871229	0.0736143	10630/6288/5328/5054/725/2152/1906	7
GO:0048732	gland development	8/115	430/17653	0.00712439	0.0884194	0.0747098	38/9076/3488/23213/3371/7052/54658/301	8
GO:0006869	lipid transport	7/115	343/17653	0.00720003	0.0888778	0.0750971	2182/4843/9388/124976/1906/301/366	7
GO:0071385	cellular response to glucocorticoid stimulus	3/115	61/17653	0.00736682	0.0904504	0.0764259	1906/54658/301	3
GO:0007599	hemostasis	7/115	346/17653	0.00753655	0.0920421	0.0777708	10630/6288/5328/5054/725/2152/1906	7
GO:0022612	gland morphogenesis	4/115	119/17653	0.00764218	0.0924597	0.0781236	3488/23213/3371/7052	4
GO:0050817	coagulation	7/115	347/17653	0.00765128	0.0924597	0.0781236	10630/6288/5328/5054/725/2152/1906	7
GO:0002822	regulation of adaptive immune response based on somatic recombination of immune receptors built from immunoglobulin superfamily domains	4/115	120/17653	0.00786674	0.0945657	0.0799031	722/725/301/718	4
GO:0032677	regulation of interleukin-8 production	3/115	63/17653	0.00805258	0.0954533	0.080653	5054/2219/301	3
GO:0009083	branched-chain amino acid catabolic process	2/115	21/17653	0.00814845	0.0954533	0.080653	38/587	2
GO:0030825	positive regulation of cGMP metabolic process	2/115	21/17653	0.00814845	0.0954533	0.080653	4843/2980	2
GO:0031281	positive regulation of cyclase activity	2/115	21/17653	0.00814845	0.0954533	0.080653	4843/2980	2
GO:0051349	positive regulation of lyase activity	2/115	21/17653	0.00814845	0.0954533	0.080653	4843/2980	2
GO:0010810	regulation of cell-substrate adhesion	5/115	191/17653	0.00828272	0.0960461	0.081154	10630/5328/25975/5054/10562	5
GO:0034341	response to interferon-gamma	5/115	191/17653	0.00828272	0.0960461	0.081154	9076/10581/4843/8651/1906	5
GO:0046889	positive regulation of lipid biosynthetic process	3/115	64/17653	0.00840908	0.0970214	0.081978	10891/60481/301	3
GO:0070555	response to interleukin-1	5/115	192/17653	0.008461	0.0971322	0.0820717	1116/3576/11213/1906/301	5
GO:0071384	cellular response to corticosteroid stimulus	3/115	65/17653	0.00877475	0.0996254	0.0841783	1906/54658/301	3
GO:0045834	positive regulation of lipid metabolic process	4/115	124/17653	0.00880834	0.0996254	0.0841783	10891/60481/2261/301	4
GO:0050729	positive regulation of inflammatory response	4/115	124/17653	0.00880834	0.0996254	0.0841783	5054/6279/7052/718	4
GO:0032355	response to estradiol	4/115	125/17653	0.00905474	0.10191	0.0861088	6751/10891/54658/301	4
GO:0050792	regulation of viral process	5/115	196/17653	0.00920073	0.103048	0.0870703	8091/10581/3576/2040/2219	5
GO:0001516	prostaglandin biosynthetic process	2/115	23/17653	0.00973413	0.106427	0.0899249	1906/301	2
GO:0008210	estrogen metabolic process	2/115	23/17653	0.00973413	0.106427	0.0899249	79154/54658	2
GO:0016338	calcium-independent cell-cell adhesion via plasma membrane cell-adhesion molecules	2/115	23/17653	0.00973413	0.106427	0.0899249	9073/9076	2
GO:0043457	regulation of cellular respiration	2/115	23/17653	0.00973413	0.106427	0.0899249	10891/4843	2
GO:0046457	prostanoid biosynthetic process	2/115	23/17653	0.00973413	0.106427	0.0899249	1906/301	2
GO:0006720	isoprenoid metabolic process	4/115	128/17653	0.0098208	0.106865	0.0902955	79644/195814/54658/3158	4
GO:0030810	positive regulation of nucleotide biosynthetic process	3/115	68/17653	0.00992717	0.107008	0.0904165	10891/4843/2980	3
GO:1900373	positive regulation of purine nucleotide biosynthetic process	3/115	68/17653	0.00992717	0.107008	0.0904165	10891/4843/2980	3
GO:0071229	cellular response to acid chemical	5/115	200/17653	0.00998401	0.107118	0.0905092	9076/10891/8651/3371/1906	5
GO:0006140	regulation of nucleotide metabolic process	5/115	201/17653	0.0101868	0.108451	0.0916354	79849/10891/4843/2980/4199	5
GO:0042440	pigment metabolic process	3/115	69/17653	0.0103299	0.108451	0.0916354	1001/10891/54658	3
GO:0050921	positive regulation of chemotaxis	4/115	130/17653	0.0103542	0.108451	0.0916354	3576/5054/2152/1906	4
GO:0050920	regulation of chemotaxis	5/115	202/17653	0.0103923	0.108451	0.0916354	3576/11240/5054/2152/1906	5
GO:0001945	lymph vessel development	2/115	24/17653	0.0105742	0.108451	0.0916354	10630/54345	2
GO:0002507	tolerance induction	2/115	24/17653	0.0105742	0.108451	0.0916354	11213/10288	2
GO:0009081	branched-chain amino acid metabolic process	2/115	24/17653	0.0105742	0.108451	0.0916354	38/587	2
GO:0032461	positive regulation of protein oligomerization	2/115	24/17653	0.0105742	0.108451	0.0916354	129293/4314	2
GO:2000482	regulation of interleukin-8 secretion	2/115	24/17653	0.0105742	0.108451	0.0916354	2219/301	2
GO:0002819	regulation of adaptive immune response	4/115	131/17653	0.0106278	0.108451	0.0916354	722/725/301/718	4
GO:0045471	response to ethanol	4/115	131/17653	0.0106278	0.108451	0.0916354	9076/6279/3371/54658	4
GO:0071216	cellular response to biotic stimulus	5/115	204/17653	0.010812	0.109842	0.092811	3576/10891/4843/5054/10288	5
GO:0031667	response to nutrient levels	8/115	465/17653	0.0111151	0.112425	0.0949928	2182/38/6751/717/10891/9388/3371/54658	8
GO:0035336	long-chain fatty-acyl-CoA metabolic process	2/115	25/17653	0.0114452	0.113936	0.0962696	2182/60481	2
GO:0043501	skeletal muscle adaptation	2/115	25/17653	0.0114452	0.113936	0.0962696	3488/10891	2
GO:0050927	positive regulation of positive chemotaxis	2/115	25/17653	0.0114452	0.113936	0.0962696	3576/2152	2
GO:0007584	response to nutrient	5/115	207/17653	0.011463	0.113936	0.0962696	2182/717/9388/3371/54658	5
GO:0061045	negative regulation of wound healing	3/115	72/17653	0.0115947	0.114014	0.0963363	5328/5054/1906	3
GO:0002224	toll-like receptor signaling pathway	4/115	135/17653	0.0117689	0.114014	0.0963363	1513/11213/6279/9865	4
GO:0030260	entry into host cell	4/115	135/17653	0.0117689	0.114014	0.0963363	9076/10581/3576/2219	4
GO:0044409	entry into host	4/115	135/17653	0.0117689	0.114014	0.0963363	9076/10581/3576/2219	4
GO:0051806	entry into cell of other organism involved in symbiotic interaction	4/115	135/17653	0.0117689	0.114014	0.0963363	9076/10581/3576/2219	4
GO:0051828	entry into other organism involved in symbiotic interaction	4/115	135/17653	0.0117689	0.114014	0.0963363	9076/10581/3576/2219	4
GO:0045582	positive regulation of T cell differentiation	3/115	73/17653	0.0120352	0.114541	0.0967811	8651/301/10288	3
GO:0006732	coenzyme metabolic process	7/115	380/17653	0.0122118	0.114541	0.0967811	2182/38/10891/60481/80221/3158/4199	7
GO:0031639	plasminogen activation	2/115	26/17653	0.0123466	0.114541	0.0967811	5328/5054	2
GO:0039694	viral RNA genome replication	2/115	26/17653	0.0123466	0.114541	0.0967811	8091/3576	2
GO:0043567	regulation of insulin-like growth factor receptor signaling pathway	2/115	26/17653	0.0123466	0.114541	0.0967811	1001/3488	2
GO:0050926	regulation of positive chemotaxis	2/115	26/17653	0.0123466	0.114541	0.0967811	3576/2152	2
GO:0060740	prostate gland epithelium morphogenesis	2/115	26/17653	0.0123466	0.114541	0.0967811	23213/3371	2
GO:0001889	liver development	4/115	137/17653	0.0123679	0.114541	0.0967811	38/9076/54658/301	4
GO:0001894	tissue homeostasis	5/115	211/17653	0.012372	0.114541	0.0967811	1513/79888/1001/6584/4069	5
GO:0033002	muscle cell proliferation	5/115	211/17653	0.012372	0.114541	0.0967811	3488/10891/7052/1906/4318	5
GO:0051701	interaction with host	5/115	211/17653	0.012372	0.114541	0.0967811	9076/10581/3576/6584/2219	5
GO:1905954	positive regulation of lipid localization	3/115	75/17653	0.0129448	0.119362	0.100855	9388/1906/718	3
GO:0010575	positive regulation of vascular endothelial growth factor production	2/115	27/17653	0.0132782	0.120245	0.101601	23213/718	2
GO:0042730	fibrinolysis	2/115	27/17653	0.0132782	0.120245	0.101601	5328/5054	2
GO:0090314	positive regulation of protein targeting to membrane	2/115	27/17653	0.0132782	0.120245	0.101601	2040/5174	2
GO:0046165	alcohol biosynthetic process	4/115	140/17653	0.0133023	0.120245	0.101601	38/3706/79644/3158	4
GO:0061008	hepaticobiliary system development	4/115	140/17653	0.0133023	0.120245	0.101601	38/9076/54658/301	4
GO:0007568	aging	6/115	298/17653	0.0133744	0.120422	0.10175	8091/9076/3488/10891/5054/1906	6
GO:0008277	regulation of G-protein coupled receptor protein signaling pathway	4/115	141/17653	0.0136236	0.122186	0.103241	8490/3576/1906/718	4
GO:0062012	regulation of small molecule metabolic process	8/115	485/17653	0.0140342	0.124309	0.105035	79849/3488/10891/4843/60481/2980/301/4199	8
GO:0044706	multi-multicellular organism process	5/115	218/17653	0.0140784	0.124309	0.105035	2182/3490/3488/1906/4318	5
GO:0043900	regulation of multi-organism process	7/115	391/17653	0.0140965	0.124309	0.105035	8091/10581/3576/4321/4843/2040/2219	7
GO:0048545	response to steroid hormone	7/115	391/17653	0.0140965	0.124309	0.105035	3490/9076/11240/10891/1906/54658/301	7
GO:0008209	androgen metabolic process	2/115	28/17653	0.0142393	0.124309	0.105035	79644/10891	2
GO:0008299	isoprenoid biosynthetic process	2/115	28/17653	0.0142393	0.124309	0.105035	79644/3158	2
GO:0060512	prostate gland morphogenesis	2/115	28/17653	0.0142393	0.124309	0.105035	23213/3371	2
GO:0042445	hormone metabolic process	5/115	219/17653	0.0143345	0.1246	0.105281	79644/10891/79154/195814/54658	5
GO:0030802	regulation of cyclic nucleotide biosynthetic process	3/115	78/17653	0.0143811	0.1246	0.105281	79849/4843/2980	3
GO:0060627	regulation of vesicle-mediated transport	8/115	490/17653	0.0148442	0.12795	0.108111	717/145741/722/27445/5054/725/301/718	8
GO:1903901	negative regulation of viral life cycle	3/115	79/17653	0.0148792	0.12795	0.108111	8091/10581/2219	3
GO:0043903	regulation of symbiosis, encompassing mutualism through parasitism	5/115	222/17653	0.0151214	0.129547	0.109461	8091/10581/3576/2040/2219	5
GO:0045589	regulation of regulatory T cell differentiation	2/115	29/17653	0.0152296	0.12999	0.109834	8651/10288	2
GO:0014074	response to purine-containing compound	4/115	147/17653	0.0156546	0.132311	0.111796	3488/10891/366/343	4
GO:0009991	response to extracellular stimulus	8/115	495/17653	0.0156879	0.132311	0.111796	2182/38/6751/717/10891/9388/3371/54658	8
GO:0015849	organic acid transport	6/115	309/17653	0.0157321	0.132311	0.111796	2182/4843/11254/1906/301/366	6
GO:0046942	carboxylic acid transport	6/115	309/17653	0.0157321	0.132311	0.111796	2182/4843/11254/1906/301/366	6
GO:1901615	organic hydroxy compound metabolic process	8/115	497/17653	0.0160349	0.134365	0.113532	38/3706/1001/79644/5333/23600/195814/3158	8
GO:0046596	regulation of viral entry into host cell	2/115	30/17653	0.0162487	0.135171	0.114212	10581/2219	2
GO:0090023	positive regulation of neutrophil chemotaxis	2/115	30/17653	0.0162487	0.135171	0.114212	3576/1906	2
GO:0050878	regulation of body fluid levels	8/115	499/17653	0.0163875	0.135833	0.114772	10630/6288/9076/5328/5054/725/2152/1906	8
GO:0000302	response to reactive oxygen species	5/115	227/17653	0.0164964	0.136244	0.115119	10891/1906/301/4318/4314	5
GO:0042446	hormone biosynthetic process	3/115	83/17653	0.0169685	0.138672	0.11717	79644/10891/79154	3
GO:0044070	regulation of anion transport	3/115	83/17653	0.0169685	0.138672	0.11717	766/1906/5174	3
GO:0030100	regulation of endocytosis	5/115	229/17653	0.017069	0.138672	0.11717	717/722/5054/725/718	5
GO:0002449	lymphocyte mediated immunity	6/115	315/17653	0.0171329	0.138672	0.11717	715/717/722/725/3426/718	6
GO:0034694	response to prostaglandin	2/115	31/17653	0.0172963	0.138672	0.11717	3371/1906	2
GO:0044319	wound healing, spreading of cells	2/115	31/17653	0.0172963	0.138672	0.11717	10630/4321	2
GO:0045066	regulatory T cell differentiation	2/115	31/17653	0.0172963	0.138672	0.11717	8651/10288	2
GO:0090505	epiboly involved in wound healing	2/115	31/17653	0.0172963	0.138672	0.11717	10630/4321	2
GO:0019058	viral life cycle	6/115	316/17653	0.0173745	0.138672	0.11717	8091/9076/10581/3576/2040/2219	6
GO:0071774	response to fibroblast growth factor	4/115	152/17653	0.0174856	0.138672	0.11717	3576/2261/23213/3371	4
GO:0045621	positive regulation of lymphocyte differentiation	3/115	84/17653	0.0175152	0.138672	0.11717	8651/301/10288	3
GO:0050829	defense response to Gram-negative bacterium	3/115	84/17653	0.0175152	0.138672	0.11717	4843/5054/4069	3
GO:0035821	modification of morphology or physiology of other organism	4/115	153/17653	0.0178671	0.140138	0.118409	8091/4843/2040/4069	4
GO:1900371	regulation of purine nucleotide biosynthetic process	4/115	153/17653	0.0178671	0.140138	0.118409	79849/10891/4843/2980	4
GO:0019217	regulation of fatty acid metabolic process	3/115	85/17653	0.0180716	0.140138	0.118409	10891/60481/301	3
GO:1903035	negative regulation of response to wounding	3/115	85/17653	0.0180716	0.140138	0.118409	5328/5054/1906	3
GO:0010634	positive regulation of epithelial cell migration	4/115	154/17653	0.0182538	0.140138	0.118409	54566/1906/301/4318	4
GO:0030808	regulation of nucleotide biosynthetic process	4/115	154/17653	0.0182538	0.140138	0.118409	79849/10891/4843/2980	4
GO:0016042	lipid catabolic process	6/115	320/17653	0.0183642	0.140138	0.118409	38/8824/79644/5333/23600/9388	6
GO:0051260	protein homooligomerization	6/115	320/17653	0.0183642	0.140138	0.118409	38/9076/2040/7052/51074/10562	6
GO:0010574	regulation of vascular endothelial growth factor production	2/115	32/17653	0.0183717	0.140138	0.118409	23213/718	2
GO:0071624	positive regulation of granulocyte chemotaxis	2/115	32/17653	0.0183717	0.140138	0.118409	3576/1906	2
GO:0090504	epiboly	2/115	32/17653	0.0183717	0.140138	0.118409	10630/4321	2
GO:0002690	positive regulation of leukocyte chemotaxis	3/115	87/17653	0.0192138	0.145114	0.122614	3576/5054/1906	3
GO:0045981	positive regulation of nucleotide metabolic process	3/115	87/17653	0.0192138	0.145114	0.122614	10891/4843/2980	3
GO:1900544	positive regulation of purine nucleotide metabolic process	3/115	87/17653	0.0192138	0.145114	0.122614	10891/4843/2980	3
GO:0006066	alcohol metabolic process	6/115	324/17653	0.019392	0.145176	0.122666	38/3706/79644/5333/195814/3158	6
GO:0051897	positive regulation of protein kinase B signaling	4/115	157/17653	0.0194451	0.145176	0.122666	1116/3488/2261/2152	4
GO:0090313	regulation of protein targeting to membrane	2/115	33/17653	0.0194748	0.145176	0.122666	2040/5174	2
GO:1902624	positive regulation of neutrophil migration	2/115	33/17653	0.0194748	0.145176	0.122666	3576/1906	2
GO:0001942	hair follicle development	3/115	88/17653	0.0197995	0.146565	0.12384	1001/3488/54345	3
GO:0046394	carboxylic acid biosynthetic process	7/115	419/17653	0.0198224	0.146565	0.12384	587/10891/60481/23600/1906/301/51074	7
GO:0055067	monovalent inorganic cation homeostasis	4/115	158/17653	0.0198526	0.146565	0.12384	6549/766/8671/1906	4
GO:0046677	response to antibiotic	6/115	326/17653	0.0199204	0.146594	0.123864	9076/6279/3371/1906/54658/301	6
GO:0016053	organic acid biosynthetic process	7/115	420/17653	0.020053	0.147098	0.12429	587/10891/60481/23600/1906/301/51074	7
GO:0032388	positive regulation of intracellular transport	5/115	240/17653	0.0204549	0.149568	0.126377	1513/63928/1001/2040/5174	5
GO:0010573	vascular endothelial growth factor production	2/115	34/17653	0.020605	0.149713	0.126499	23213/718	2
GO:0051482	positive regulation of cytosolic calcium ion concentration involved in phospholipase C-activating G-protein coupled signaling pathway	2/115	34/17653	0.020605	0.149713	0.126499	7052/1906	2
GO:0001101	response to acid chemical	6/115	329/17653	0.0207313	0.150155	0.126873	3490/9076/10891/8651/3371/1906	6
GO:0022404	molting cycle process	3/115	90/17653	0.0210005	0.150678	0.127315	1001/3488/54345	3
GO:0022405	hair cycle process	3/115	90/17653	0.0210005	0.150678	0.127315	1001/3488/54345	3
GO:0098773	skin epidermis development	3/115	90/17653	0.0210005	0.150678	0.127315	1001/3488/54345	3
GO:0009108	coenzyme biosynthetic process	5/115	242/17653	0.0211144	0.151024	0.127607	2182/38/10891/60481/4199	5
GO:0002683	negative regulation of immune system process	7/115	426/17653	0.0214765	0.151871	0.128323	11213/11240/4321/722/725/301/10288	7
GO:0051453	regulation of intracellular pH	3/115	91/17653	0.0216157	0.151871	0.128323	6549/766/8671	3
GO:0097327	response to antineoplastic agent	3/115	91/17653	0.0216157	0.151871	0.128323	9076/1906/10974	3
[truncated: 3,173 more rows]

## Sheet: Table S4
Table S4. The 22 enriched genes in KEGG pathways
ID	Description	GeneRatio	BgRatio	pvalue	p.adjust	qvalue	geneID	geneSymbol	Count
hsa04610	Complement and coagulation cascades	5/20	115/10954	1.59769207328618e-06	5.27238384184439e-05	2.01813735572991e-05	P00749/Q59GZ8/A0A024QZM9/A0A024QYT5/P05121	PLAU/PLAU/PLAU/SERPINE1/SERPINE1	5
hsa04530	Tight junction	5/20	239/10954	5.62321494684744e-05	0.000927830466229827	0.000355150417695628	A5JSJ9/O95832/Q9H329/Q59GC2/Q9NSG9	CLDN1/CLDN1/EPB41L4B/EPB41L4B/EPB41L4B	5
hsa04371	Apelin signaling pathway	4/20	220/10954	0.000595659095125268	0.00655225004637795	0.00250803829526429	Q9UBK2/A0A024R9Q9/A0A024QYT5/P05121	PPARGC1A/PPARGC1A/SERPINE1/SERPINE1	4
hsa04064	NF-kappa B signaling pathway	3/20	145/10954	0.00219564565260876	0.0156596983928779	0.00599414292550351	P00749/Q59GZ8/A0A024QZM9	PLAU/PLAU/PLAU	3
hsa05215	Prostate cancer	3/20	149/10954	0.00237268157467847	0.0156596983928779	0.00599414292550351	P00749/Q59GZ8/A0A024QZM9	PLAU/PLAU/PLAU	3
hsa02010	ABC transporters	2/20	64/10954	0.00596639930871524	0.0328151961979338	0.0125608406499268	A0A024RAV7/O60706	ABCC9/ABCC9	2
hsa04979	Cholesterol metabolism	2/20	78/10954	0.00875273775398647	0.037216730704299	0.0142456385471001	Q9Y5X9/A0A024R2B5	LIPG/LIPG	2
hsa05202	Transcriptional misregulation in cancer	3/20	249/10954	0.00993832481297273	0.037216730704299	0.0142456385471001	P00749/Q59GZ8/A0A024QZM9	PLAU/PLAU/PLAU	3
hsa05206	MicroRNAs in cancer	3/20	253/10954	0.0103786534857754	0.037216730704299	0.0142456385471001	P00749/Q59GZ8/A0A024QZM9	PLAU/PLAU/PLAU	3
hsa00561	Glycerolipid metabolism	2/20	89/10954	0.0112777971831209	0.037216730704299	0.0142456385471001	Q9Y5X9/A0A024R2B5	LIPG/LIPG	2
hsa04115	p53 signaling pathway	2/20	101/10954	0.014354812092333	0.0430644362769991	0.0164839947471767	A0A024QYT5/P05121	SERPINE1/SERPINE1	2
hsa04920	Adipocytokine signaling pathway	2/20	111/10954	0.0171658843657285	0.0472061820057534	0.0180693519639248	Q9UBK2/A0A024R9Q9	PPARGC1A/PPARGC1A	2
hsa05205	Proteoglycans in cancer	3/20	319/10954	0.0193164945708773	0.0490341785260731	0.01876906355065	P00749/Q59GZ8/A0A024QZM9	PLAU/PLAU/PLAU	3
hsa04211	Longevity regulating pathway	2/20	136/10954	0.0251203107759895	0.0592121611148323	0.0226649420535243	Q9UBK2/A0A024R9Q9	PPARGC1A/PPARGC1A	2
hsa04931	Insulin resistance	2/20	158/10954	0.0331394823165654	0.0667144255250337	0.0255366222105392	Q9UBK2/A0A024R9Q9	PPARGC1A/PPARGC1A	2
hsa04922	Glucagon signaling pathway	2/20	161/10954	0.0343022854774486	0.0667144255250337	0.0255366222105392	Q9UBK2/A0A024R9Q9	PPARGC1A/PPARGC1A	2
hsa05142	Chagas disease (American trypanosomiasis)	2/20	162/10954	0.0346934564588049	0.0667144255250337	0.0255366222105392	A0A024QYT5/P05121	SERPINE1/SERPINE1	2
hsa04933	AGE-RAGE signaling pathway in diabetic complications	2/20	169/10954	0.0374809070555894	0.0667144255250337	0.0255366222105392	A0A024QYT5/P05121	SERPINE1/SERPINE1	2
hsa04670	Leukocyte transendothelial migration	2/20	173/10954	0.0391118194621054	0.0667144255250337	0.0255366222105392	A5JSJ9/O95832	CLDN1/CLDN1	2
hsa04152	AMPK signaling pathway	2/20	178/10954	0.0411885780594002	0.0667144255250337	0.0255366222105392	Q9UBK2/A0A024R9Q9	PPARGC1A/PPARGC1A	2
hsa04066	HIF-1 signaling pathway	2/20	181/10954	0.0424546344250215	0.0667144255250337	0.0255366222105392	A0A024QYT5/P05121	SERPINE1/SERPINE1	2
hsa04910	Insulin signaling pathway	2/20	206/10954	0.0535627328000516	0.0803440992000775	0.0307537221818478	Q9UBK2/A0A024R9Q9		2
